# Supplementary material for: Association between genetically determined leptin and blood lipids considering alcohol consumption: a Mendelian randomisation study
Source: PubMed Central journal article supplement — BMJ Open. 2019 Nov 7;9(11):e026860. doi: 10.1136/bmjopen-2018-026860 (PMC6858149; doi:10.1136/bmjopen-2018-026860), 2019-11-07
Supplement: bmjopen-2018-026860.draft_revisions.pdf [file bmjopen-2018-026860.draft_revisions.pdf]

# BMJ Open

BMJ Open is committed to open peer review. As part of this commitment we make the peer review history of every article we publish publicly available.

When an article is published we post the peer reviewers' comments and the authors' responses online. We also post the versions of the paper that were used during peer review. These are the versions that the peer review comments apply to.

The versions of the paper that follow are the versions that were submitted during the peer review process. They are not the versions of record or the final published versions. They should not be cited or distributed as the published version of this manuscript.

BMJ Open is an open access journal and the full, final, typeset and author-corrected version of record of the manuscript is available on our site with no access controls, subscription charges or pay-per-view fees (<http://bmjopen.bmj.com>).

If you have any questions on BMJ Open's open peer review process please email [info.bmjopen@bmj.com](mailto:info.bmjopen@bmj.com)

# BMJ Open

## The effect of genetically determined leptin on blood lipids considering alcohol consumption

|                               |                                                                                                                                                                                                                                                                                                                                                                                                                                                                                                                                                                                                                                                        |
|-------------------------------|--------------------------------------------------------------------------------------------------------------------------------------------------------------------------------------------------------------------------------------------------------------------------------------------------------------------------------------------------------------------------------------------------------------------------------------------------------------------------------------------------------------------------------------------------------------------------------------------------------------------------------------------------------|
| Journal:                      | <i>BMJ Open</i>                                                                                                                                                                                                                                                                                                                                                                                                                                                                                                                                                                                                                                        |
| Manuscript ID                 | bmjopen-2018-026860                                                                                                                                                                                                                                                                                                                                                                                                                                                                                                                                                                                                                                    |
| Article Type:                 | Research                                                                                                                                                                                                                                                                                                                                                                                                                                                                                                                                                                                                                                               |
| Date Submitted by the Author: | 22-Sep-2018                                                                                                                                                                                                                                                                                                                                                                                                                                                                                                                                                                                                                                            |
| Complete List of Authors:     | Shen, Luqi; University of Georgia, Department of Epidemiology and Biostatistics<br>Cordero, José ; University of Georgia, Department of Epidemiology and Biostatistics<br>Wang, Jia-Sheng; University of Georgia, Department of Environmental Health Science<br>Shen, Ye; University of Georgia, Department of Epidemiology and Biostatistics<br>Li, Shengxu; Tulane University School of Public Health and Tropical Medicine, Department of Epidemiology<br>Li, Changwei; University of Georgia College of Public Health, Department of Epidemiology and Biostatistics; Tulane University School of Public Health and Tropical Medicine, Epidemiology |
| Keywords:                     | EPIDEMIOLOGY, leptin, lipids, alcohol consumption, genetic risk score                                                                                                                                                                                                                                                                                                                                                                                                                                                                                                                                                                                  |
|                               |                                                                                                                                                                                                                                                                                                                                                                                                                                                                                                                                                                                                                                                        |

SCHOLARONE™  
Manuscripts

1  
2  
3 **1 The effect of genetically determined leptin on blood lipids considering alcohol consumption**  
4  
5

6 **2 Running title: Genetically determined leptin and lipids**  
7

8  
9 **3 Luqi Shen<sup>a</sup>, José F. Cordero<sup>a</sup>, Jia-Sheng Wang<sup>b</sup>, Ye Shen<sup>a</sup>, Shengxu Li<sup>c</sup>, Changwei Li<sup>a,c</sup>**  
10  
11

12 **4 Author names and affiliations:**  
13  
14

15 **5 a. Department of Epidemiology and Biostatistics, College of Public Health, University of**  
16 **6 Georgia, Health Sciences Campus, 101 Buck Road, Athens, GA 30602, USA.**  
17  
18

19 **7 b. Department of Environmental Health Science, College of Public Health, University of**  
20 **8 Georgia, 150 East Green Street, Athens, GA 30602, USA.**  
21  
22

23 **9 c. Department of Epidemiology, Tulane University School of Public Health and Tropical**  
24 **10 Medicine, 1440 Canal Street, Suite 2000, New Orleans, LA 70112, USA.**  
25  
26  
27  
28

29 **11**  
30  
31 **12 Corresponding author: Assistant Professor Changwei Li, Department of Epidemiology and**  
32 **13 Biostatistics, College of Public Health, University of Georgia, 120 B.S. Miller Hall, Health**  
33 **14 Sciences Campus, 101 Buck Road, Athens, GA 30602, USA. Telephone: 706.583.0918, Email:**  
34 **15 [changwei.li@uga.edu](mailto:changwei.li@uga.edu)**  
35  
36  
37  
38  
39  
40

41 **16 Word count: 2,873**  
42  
43  
44  
45  
46  
47  
48  
49

---

50 Abbreviations: CVD, cardiovascular disease; dbGaP, the database of genotype and phenotype; FHS, the  
51 Framingham Heart Study; GRS, genetic risk score; GWAS, genome-wide association studies; HDL-C,  
52 high density lipoprotein cholesterol; LDL-C, low density lipoprotein cholesterol; log-leptin,  
53 logarithmically transformed leptin; log-TG, logarithmically transformed TG; TC, total cholesterol; TG,  
54 triglycerides  
55  
56  
57  
58  
59  
60

## Abstract

**Objectives:** We evaluated the effect of genetically determined leptin on lipids using baseline data for 3,860 participants of the Framingham Heart Study 3<sup>rd</sup> Generation cohort.

**Material and methods:** Two genetic risk scores (GRSs) were generated using leptin loci independent and dependent of body mass index (BMI), respectively. Associations between leptin GRSs and leptin levels, leptin and lipid levels, and the leptin GRSs and lipid levels were assessed by multivariate linear regression models. Interactions between the GRSs and alcohol consumption were also evaluated in the models.

**Results:** Both GRSs were positively associated with log transformed leptin (log-leptin). The BMI independent leptin GRS was associated with log transformed triglycerides (log-TG) ( $\beta=-0.66$ ,  $p=0.01$ ), but not low density lipoprotein cholesterol (LDL-C) ( $p=0.99$ ), high density lipoprotein cholesterol (HDL-C) ( $p=0.44$ ), or total cholesterol (TC) ( $p=0.49$ ). Instrumental variable estimation showed that per unit increase in genetically determined log-leptin was associated with 0.55 (95% confidence interval: 0.05-1.00) units decrease in log-TG. Besides significant association with log-TG ( $\beta=-0.59$ ,  $p=0.009$ ), the BMI dependent GRS was nominally associated with HDL-C ( $\beta=-10.67$ ,  $p=0.09$ ) and TC ( $\beta=-28.05$ ,  $p=0.08$ ). When stratified by drinking status, the BMI dependent GRS was associated with reduced levels of LDL-C ( $p=0.03$ ), log-TG ( $p=0.004$ ), and TC ( $p=0.003$ ) among non-current drinkers only. Significant interactions between the BMI dependent GRS and alcohol drinking were identified for LDL-C ( $p=0.03$ ), TG ( $p=0.03$ ), and TC ( $p=0.02$ ).

1  
2  
3 1 **Conclusion:** These findings together indicated that genetically determined leptin reduced lipid  
4  
5 2 levels and the effect may be modified by alcohol consumption.  
6  
7

8  
9 3 **Keywords:** leptin, lipids, alcohol consumption, genetic risk score  
10  
11

12 4 **Strengths and limitations of this study:**  
13  
14

- 15 5 • Population-based Mendelian randomization studies may offer an opportunity to provide  
16  
17 6 better evidence for the effect of leptin on lipid metabolism in the adult population  
18  
19 7 compared with observational epidemiology studies.  
20  
21 8 • The stringent quality control methods were used in measuring genotypes, phenotype, and  
22  
23 9 covariates in the current study to reduce measurement error and increase the statistical  
24  
25 10 power.  
26  
27 11 • Pleiotropy effects of SNPs included in the leptin genetic risk score (GRS) may confound  
28  
29 12 the leptin GRS and lipids associations.  
30  
31 13 • Our analyses were restricted to individuals of European ancestry.  
32  
33  
34  
35  
36  
37  
38  
39  
40  
41  
42  
43  
44  
45  
46  
47  
48  
49  
50  
51  
52  
53  
54  
55  
56  
57  
58  
59  
60

## Introduction

1  
2  
3  
4  
5  
6  
7  
8  
9  
10  
11  
12  
13  
14  
15  
16  
17  
18  
19  
20  
21  
22  
23  
24  
25  
26  
27  
28  
29  
30  
31  
32  
33  
34  
35  
36  
37  
38  
39  
40  
41  
42  
43  
44  
45  
46  
47  
48  
49  
50  
51  
52  
53  
54  
55  
56  
57  
58  
59  
60

1  
2  
3  
4  
5  
6  
7  
8  
9  
10  
11  
12  
13  
14  
15  
16  
17  
18  
19  
20  
21  
22  
23  
24  
25  
26  
27  
28  
29  
30  
31  
32  
33  
34  
35  
36  
37  
38  
39  
40  
41  
42  
43  
44  
45  
46  
47  
48  
49  
50  
51  
52  
53  
54  
55  
56  
57  
58  
59  
60

Leptin is a key hormone that regulates appetite and food intake, body weight, and energy balance (Campfield et al., 1995, Halaas et al., 1995). Leptin is secreted primarily from the stomach, placenta, and adipose tissue (Zhang et al., 1994). Biological studies have demonstrated that elevated leptin levels may play an important role in the pathogenesis of lipid accumulation (Enser and Ashwell, 1983, Harris, 2014, Kosztaczky et al., 2007, Sainz et al., 2015, Selenscig et al., 2010, Wang et al., 1999). Case reports and case series have documented that leptin therapy can improve lipid profiles among patients with lipoatrophy or congenital leptin deficiency (Ebihara et al., 2007, Javor et al., 2005, Kamran et al., 2012, Park et al., 2007, Paz-Filho et al., 2015). On contrary, in a cross-sectional survey of 12-16 years old high school students, plasma leptin was positively associated with total cholesterol (TC), high density lipoprotein cholesterol (HDL-C), low-density lipoprotein cholesterol (LDL-C), and triglycerides (TG) (Wu et al., 2001). Since observational epidemiologic studies cannot rule out all confounding effects, it is unclear whether such an association is causal. On the other hand, there are studies that demonstrate a neutral effect of leptin on blood lipid levels (Sekhar et al., 2012). A small clinical trial that involved 17 patients with HIV-associated lipodystrophy suggested that leptin treatment did not improve fasting lipid kinetics (Sekhar et al., 2012). Population-based Mendelian randomization studies may offer an opportunity to provide better evidence for the effect of leptin on lipid metabolism in the adult population. Recently, a large-scale genome-wide association study (GWAS) meta-analysis identified five genomic loci associated with circulating leptin (Kilpelainen et al., 2016), which provides an opportunity to conduct a Mendelian randomization study to delineate the association between serum leptin and lipids levels. In addition, alcohol consumption has been shown to influence leptin secretion in both human and animal models

1 (Beulens et al., 2008, Greco et al., 2000, Henriksen et al., 1999, Maddalozzo et al., 2009, Nicolas  
2 et al., 2001, Otaka et al., 2007, Pravdova et al., 2009, Rojdmarm et al., 2001, Roth et al., 2003,  
3 Santolaria et al., 2003, Slomiany and Slomiany, 2009, Tan et al., 2012, Voican et al., 2015, Yu et  
4 al., 2010). In rodent models, leptin has been demonstrated to be increased (Pravdova et al.,  
5 2009, Slomiany and Slomiany, 2009, Yu et al., 2010) or decreased (Maddalozzo et al., 2009, Tan  
6 et al., 2012) after alcohol intake. Similarly, leptin levels in human was decreased (Santolaria et  
7 al., 2003), increased (Henriksen et al., 1999, Nicolas et al., 2001), or even unchanged (Beulens et  
8 al., 2008, Greco et al., 2000, Voican et al., 2015) after drinking. It is unclear whether alcohol  
9 consumption modifies the effect of genetically determined leptin on lipid levels  
10 (Balasubramanian and Nalini, 2006, Wannamethee et al., 2007).

11 Therefore, the objectives of the current study were to evaluate the relationship between  
12 genetically determined leptin and lipid levels and to explore whether the leptin-lipids  
13 associations could be modified by alcohol consumption among participants of the Framingham  
14 Heart Study (FHS) 3<sup>rd</sup> generation cohort.

## 15 **Materials and Methods**

### 16 **Data Sources and Study Participants**

17 The FHS was designed to identify common factors or characteristics that contribute to  
18 cardiovascular disease (CVD) by tracking the development of CVD over a long period of time.  
19 Participants of the FHS were free from overt symptoms of CVD or stroke at baseline. Later on,  
20 the FHS was extended to including offspring and third generation of the original participants. A  
21 detailed description of the FHS 3<sup>rd</sup> generation cohort has been outlined in previous publications  
22 (Splansky et al., 2007). Genotype and phenotype data of the FHS are cataloged on the database

1 of genotype and phenotype (dbGaP) at the National Center for Biotechnology Information  
2 (NCBI). We have received approval to use the FHS data by the Institutional Review Boards at  
3 the University of Georgia and the NCBI. Circulating leptin levels, genotypes, lipid levels, and  
4 important covariates were available for 3,860 (94.7%) participants of the 3<sup>rd</sup> generation cohort at  
5 baseline in 2002-2005 (**Table 1**). Those participants were included in the current analyses.

## 6 **Genotyping and Genetic Risk Score**

7 Genetic loci for circulating leptin levels have been reported in a large genome-wide  
8 association studies (GWAS) meta-analysis by Kilpelainen and colleagues(Kilpelainen et al.,  
9 2016). This study included 32,161 individuals of European ancestry and identified three single-  
10 nucleotide polymorphisms (SNPs), *GCKR* rs780093, *LEP* rs10487505, and *SLC32A1* rs6071166,  
11 that were robustly associated with body mass index (BMI) adjusted leptin at a genome-wide  
12 significance level ( $p < 5 \times 10^{-08}$ ). In addition, *GCKR* rs780093, *CCNLI* rs900400, and *FTO*  
13 rs8043757 were associated with circulating leptin without adjustment for BMI(Kilpelainen et al.,  
14 2016). We assumed the additive genetic model for each SNP and constructed two genetic risk  
15 scores (GRSs) for leptin by combining leptin-increasing alleles for SNPs weighted by their  
16 corresponding effect sizes on logarithmically transformed leptin (log-leptin) as reported in the  
17 original GWAS meta-analysis(Kilpelainen et al., 2016). The first score, GRS1, was generated  
18 using the three SNPs associated with BMI adjusted leptin, and the second score, GRS2, using the  
19 three SNPs associated with leptin unadjusted for BMI.

20 Genome-wide SNPs were genotyped using Affymetrix and Illumina platforms in the  
21 FHS. The 1000 Genome genotype data for the FHS was already imputed and cataloged on the  
22 dbGaP. According to the document of the FHS (2010), before imputation, quality control



1 removed SNPs with a Hardy-Weinberg equilibrium  $p < 1 \times 10^{-6}$ , a missing rate  $> 3.1\%$ , a minor  
2 allele frequency (MAF)  $< 1\%$ , a missing physical position or cannot mapped to build 37 positions,  
3 Mendelian errors  $> 1000$ , or duplicate SNPs. MACH software was used for genotype phasing,  
4 followed by imputation using MiniMac software (Auton et al., 2015, Das et al., 2016).  
5 Imputation results were summarized as dosage scores, which represent the expected numbers of  
6 copies of the coded allele for each SNP, ranging from 0 to 2. After imputation, SNPs with  
7  $r^2 < 0.30$ , an MAF  $< 1\%$ , or a Hardy-Weinberg equilibrium  $p < 1 \times 10^{-6}$  were removed. We retrieved  
8 genotypes of the SNPs for GRSs from the imputed data for all study participants (**Supplemental**  
9 **Table S1 and Supplemental Table S2**).

## 10 **Leptin and Lipids measurement**

11 In the FHS, blood samples were collected after overnight fasting and analyzed following  
12 standard protocols (Andersson et al., 2015). Serum leptin levels were determined by enzyme-  
13 linked immunosorbent assay (ELISA) method at R&D Systems using the Quantikine Human  
14 Leptin Immunoassay (Andersson et al., 2015). Leptin was logarithmically transformed for  
15 analyses in the current study.

16 Fasting blood lipids, including TC, HDL-C, and TG, were measured using automated  
17 enzymatic assays (Andersson et al., 2015). For participants taking lipid-lowering medications,  
18 TC was adjusted as TC/0.8 (Rao et al., 2017). After adjustment, LDL-C was calculated using the  
19 Friedewald formula (Friedewald et al., 1972). The adjusted TC and LDL-C and logarithmically  
20 transformed TG (log-TG) were used for analyses in the current study.

## 21 **Covariates**

1 Demographic and health behavioral variables, including age, gender, education, smoking,  
2 and drinking, were based on self-report. Education levels were categorized into “no more than  
3 high school,” “some college,” and “bachelor’s degree or above.” Smoking was categorized into  
4 “current smoker” or “not a current smoker” and drinking status into “current drinker” and “not a  
5 current drinker.” Physical activity was measured with the physical activity index composite  
6 score, which was calculated by summing the number of hours spent in each activity intensity  
7 level weighted by their corresponding weight factor derived from the estimated oxygen  
8 consumption requirement for each intensity level (Kannel and Sorlie, 1979). BMI was calculated  
9 as weight in kilograms divided by the square of height in meters. Waist circumference was  
10 measured to next lower 1/4 inch by regional anthropometry.

## 11 **Statistical Analysis**

12 Weighted GRSs for leptin were calculated for each participant as the sum of the products  
13 of the participant’s dosage scores for each SNP and the SNP’s estimated effect size. Since  
14 obesity is highly associated with both leptin and blood lipids, our main focus was on GRS1, the  
15 score generated using loci associated with leptin independent of BMI. The GRS1 for participants  
16 was then categorized into quartiles. Means and standard deviations for continuous and  
17 frequencies and percentages for categorical characteristics at baseline were calculated for each  
18 quartile of the GRS1. *p* values for linear trends in those variables across quartiles of the GRS1  
19 were estimated.

20 Three multivariate linear regression models were used to assess associations between log-  
21 leptin and lipids, leptin GRS and log-leptin, and the leptin GRS and lipids, respectively. All  
22 models were adjusted for age, sex, BMI, and waist circumference. To test robustness of the

1 leptin GRS and lipids associations, we additionally controlled for education, smoking, drinking,  
2 and physical activity index score in the fully adjusted models. To explore whether associations  
3 between the leptin GRS and lipids levels were modified by alcohol consumption, we performed  
4 stratified analyses by drinking status. In each stratum of the drinking status, we tested  
5 associations between leptin GRS and lipids by adjusting for age, sex, BMI, and waist  
6 circumference in the base model and additionally adjusting for education, smoking, and physical  
7 activity in the full model. Interactions between the leptin GRS and alcohol consumption were  
8 tested among the overall participants by adding drinking and the interaction term, GRS×drinking,  
9 to the models. All the above analyses were done for GRS1 and GRS2 separately. We quantified  
10 the strength of the causal association of leptin with lipids using the instrumental variable  
11 estimator (Palmer et al., 2011). The estimator was calculated as the ratio of the coefficient for  
12 leptin GRS and lipids association to the coefficient for the leptin GRS and log-leptin association  
13 from the base models.

14 To rule out the effect of lipid-lowering medications, sensitivity analyses were performed  
15 among those not taking lipid medication. To rule out the effect of both diabetes and lipid-  
16 lowering medications, sensitivity analyses were performed among those not taking lipid- or  
17 glucose-lowering medications. All analyses were performed using SAS software (version 9.4;  
18 SAS Institute Inc., Cary, North Carolina). Two-sided  $p$  values were provided, and  $p < 0.05$  was  
19 considered significant.

## 20 Results

21 Characteristics of the study participants are presented in **Table 1**. Participants were on  
22 average 40.2 years old at baseline. There were slightly more females (53.2%), and only 15.4%

1 had less than a high school education. The majority (89.1%) of the participants were current  
2 drinkers, and 15.6% were current smokers. Participants were on average over weighted, with a  
3 mean BMI of 26.9 kg/m<sup>2</sup> and mean waist girth of 36.6 inches. About 6.9% of the participants  
4 were treated for dyslipidemia, and 1.9% were treated for diabetes. The BMI independent leptin  
5 GRS1 was not associated with age ( $p=0.23$ ), sex ( $p=0.89$ ), education ( $p=0.22$ ), smoking  
6 ( $p=0.53$ ), drinking ( $p=0.32$ ), BMI ( $p=0.94$ ), waist circumference ( $p=0.70$ ), lipid-lowering  
7 medication usage ( $p=0.26$ ), or the physical activity index score ( $p=0.51$ ), but with diabetes-  
8 lowering medication usage ( $p=0.03$ ). As expected, the GRS1 was positively associated with age,  
9 sex, BMI, and waist circumference adjusted log-leptin ( $p=4.56\times 10^{-5}$ ).

#### 10 **BMI independent leptin GRS1 and blood lipids**

11 After controlling for age, sex, BMI, and waist circumference, log-leptin was positively  
12 associated with TC ( $\beta=8.56$ ,  $p=6.35\times 10^{-18}$ ), LDL-C ( $\beta=6.46$ ,  $p=1.85\times 10^{-13}$ ), and log-TG ( $\beta=0.13$ ,  
13  $p=1.59\times 10^{-20}$ ), but was not associated with HDL-C ( $\beta=-0.62$ ,  $p=0.11$ ) (**Figure 1 and**  
14 **Supplemental Figure S1**). Per unit increase in the leptin GRS1 was associated with a 1.21-unit  
15 increase in the age, sex, BMI, and waist circumference adjusted log-leptin ( $p=4.56\times 10^{-5}$ ). The  
16 leptin GRS1 was inversely associated with age, sex, BMI, and waist circumference adjusted log-  
17 TG ( $\beta=-0.66$ ,  $p=0.01$ ) (**Figure 1**). When further adjusting for education, smoking, drinking, and  
18 physical activity, the GRS1 and log-TG association was still significant ( $\beta=-0.69$ ,  $p=0.008$ ,  
19 **Table 2**). Instrumental variable estimation indicated that log-TG levels decreased by 0.55 (95%  
20 CI: 0.05, 1.00,  $p=0.02$ ) per unit increase of genetically determined log-leptin level (**Figure 1**).  
21 The leptin GRS1 was inversely associated with TC ( $\beta=-12.50$ ,  $p=0.49$ ) and LDL-C ( $\beta=-0.11$ ,  
22  $p=0.99$ ) and positively associated with HDL-C ( $\beta=5.42$ ,  $p=0.44$ ), however, the correlations were

1 not significant. The GRS1 and blood lipids associations were not modified by drinking status  
2  
3  
4  
5  
6  
7  
8  
9  
10  
11  
12  
13  
14  
15  
16  
17  
18  
19  
20  
21  
22  
23  
24  
25  
26  
27  
28  
29  
30  
31  
32  
33  
34  
35  
36  
37  
38  
39  
40  
41  
42  
43  
44  
45  
46  
47  
48  
49  
50  
51  
52  
53  
54  
55  
56  
57  
58  
59  
60

1 not significant. The GRS1 and blood lipids associations were not modified by drinking status  
(Table 2).

### 3 BMI dependent leptin GRS2 and blood lipids

4 As expected, the BMI dependent leptin GRS2 was not associated with any covariate  
5 except for the BMI ( $p=0.02$ ) and waist circumference ( $p=0.03$ ). In the analyses controlling for  
6 age, sex, BMI, and waist circumference, the GRS2 was significantly associated with lower levels  
7 of log-TG ( $p=0.009$ ) and nominally associated with lower levels of HDL-C ( $p=0.09$ ) and TC  
8 ( $p=0.08$ ) (Supplemental Figure S2). When stratified by drinking status, the leptin GRS2 was  
9 negatively associated with LDL-C ( $\beta=-92.51$ ,  $p=0.03$ ), log-TG ( $\beta=-2.07$ ,  $p=0.004$ ), and TC ( $\beta=-$   
10  $144.68$ ,  $p=0.003$ ) only among non-current drinkers (Table 3). When further adjusting for  
11 education, smoking, drinking, and physical activity, those associations persisted (Table 3).  
12 Furthermore, significant interactions between leptin GRS2 and alcohol drinking were identified  
13 for LDL-C ( $p=0.03$ ), log-TG ( $p=0.03$ ), and TC ( $p=0.02$ ) (Table 3).

14 When restricting to participants not taking lipid-lowering medication and those not taking  
15 lipid- or glucose-lowering medications, respectively, the associations of GRS1 and GRS2 with  
16 blood lipids were similar to those as shown above (Supplemental Table S3, S4, S5 and S6).

## 17 Discussion

18 To the best of our knowledge, the current study is the first Mendelian randomization  
19 analysis on leptin and blood lipids. We provide robust evidence to support a potentially causal  
20 relation between leptin and reduced levels of triglycerides among a majority of overweight and  
21 obese population of European ancestry. Furthermore, we demonstrated that alcohol consumption

1 modified the association of BMI dependent GRS2 with lipids in that genetically determined  
2 leptin levels were inversely associated with LDL-C, log-TG, and TC, but only among individuals  
3 who were not current drinkers.

4 Both the BMI dependent- and independent- GRSs were associated with lower level of  
5 log-TG in the current study. Inconsistent associations between leptin and blood lipids have been  
6 observed in previous studies. In a small study of 80 postmenopausal women, serum leptin was  
7 positively associated with HDL-C, TG, and TC, and inversely associated with LDL-C (Jaleel et  
8 al., 2006). Another study conducted with 294 healthy school children reported that leptin was  
9 only associated with increased TG (Kavazarakis et al., 2001). However, a study of 476 residents  
10 from Cameroon reported a positive correlation between leptin, LDL-C, and TC, and a positive  
11 association between leptin and TC, but no association between leptin and HDL-C or TG (Ayina  
12 et al., 2016). In a more recent study of 134 physically active postmenopausal women, no  
13 significant correlation was detected for leptin and blood lipids (Jürimäe et al., 2010). The  
14 divergent results of previous studies make it impossible to infer a relationship between leptin and  
15 blood lipids. Possible reasons for the divergent findings include varying sample sizes, failure to  
16 account for residual and unmeasured confounding, and the genetic background of the study  
17 population. Through Mendelian randomization analyses, we demonstrated that genetically  
18 determined leptin was inversely associated with log-TG. It is well known that alleles, such as  
19 risk alleles for leptin, are randomly assigned at meiosis and therefore, are independent of non-  
20 genetic confounders. The association between leptin GRS and log-TG in the current study was  
21 less prone to confounding. Our finding is further supported by previous physiologic studies,  
22 among which, leptin was demonstrated to inhibit lipogenesis, stimulate lipolysis, and reduce  
23 triglyceride uptake (Hynes and Jones, 2001). However, the association of HDL-C and TC were

1 only nominally significant with BMI dependent GRS2 in the current study. It could be due to  
2 lack of statistical power or existing interaction of leptin and drinking. Therefore, we cannot rule  
3 out causal relationships between leptin and those lipid measures. Future large-scale Mendelian  
4 randomization studies are warranted to evaluate associations of leptin GRS with HDL-C, LDL-  
5 C, and TC.

6 The BMI independent GRS1 was only associated with log-TG, while the BMI dependent  
7 GRS2 was also in nominal associations with HDL-C and TC. In addition, alcohol drinking  
8 modified the GRS2-lipids associations but not the GRS1-lipids associations. This indicated that  
9 the role of leptin in blood lipids regulation may be through multiple mechanisms. The BMI  
10 dependent GRS2 were inversely associated with LDL-C, log-TG, and TC only among non-  
11 current drinkers, but not among current drinkers. Although future studies are warranted to  
12 confirm these interactions, previous physiological studies may provide a reasonable explanation.  
13 Singh and colleagues demonstrated that the increased expression of caveolin-1 impairs leptin  
14 signaling and attenuates leptin-dependent effect to prevent lipid accumulation in human white  
15 pre-adipocytes (Singh et al., 2012). Meanwhile, Caveolin-1 can be increased by alcohol drinking  
16 (Gao et al., 2014).

17 Our study represents the first Mendelian randomization analyses for leptin and blood  
18 lipids in a population of European ancestry. A major strength of this study is the stringent quality  
19 control methods used in measuring genotypes, phenotype, and covariates in the FHS 3<sup>rd</sup>  
20 Generation Cohort. Those methods can reduce measurement error and increase the statistical  
21 power needed to identify associations between leptin GRS and lipids. We also identify some  
22 limitations. First, pleiotropy effects of SNPs included in the leptin GRS may confound the leptin

1  
2  
3 1 GRS and lipids associations. It is possible that our results may represent a shared genetic basis  
4  
5 2 between leptin and lipids rather than a causal relationship. Second, we may not have sufficient  
6  
7 3 power to detect associations between genetically determined leptin levels and LDL-C, HDL-C,  
8  
9 4 and TC. Larger Mendelian randomization studies are warranted to evaluate associations between  
10  
11 5 leptin and LDL-C, HDL-C, and TC. Finally, our analyses were restricted to individuals of  
12  
13 6 European ancestry. Our findings may not be generalizable to populations of other ancestries.  
14  
15  
16  
17

18 7 In summary, the present study provided robust evidence for a causal effect of leptin on  
19  
20 8 reduced triglycerides. In addition, genetically determined leptin may regulate blood lipids  
21  
22 9 through different mechanisms, and the effect of leptin on lipid metabolism may be modified by  
23  
24 10 alcohol consumption.  
25  
26  
27

## 28 11 **Acknowledgements**

29  
30  
31  
32 12 We acknowledge editorial assistance of Ms. Jessica Ho.  
33  
34

## 35 13 **Author Contributions**

36  
37  
38 14 Conceptualization, Changwei Li, José Cordero, Jia-Sheng Wang, and Shengxu Li;  
39  
40 15 Formal analysis, Luqi Shen and Ye Shen; Supervision, Changwei Li, José Cordero, Jia-Sheng  
41  
42 16 Wang, and Shengxu Li; Writing – original draft, Luqi Shen; Writing – review & editing,  
43  
44 17 Changwei Li, José Cordero, and Luqi Shen.  
45  
46  
47

## 48 18 **Conflict of interest**

49  
50  
51  
52 19 Conflicts of interest and disclosures: none.  
53  
54

## 55 20 **Funding sources**



1  
2  
3  
4  
5  
6  
7  
8  
9  
10  
11  
12  
13  
14  
15  
16  
17  
18  
19  
20  
21  
22  
23  
24  
25  
26  
27  
28  
29  
30  
31  
32  
33  
34  
35  
36  
37  
38  
39  
40  
41  
42  
43  
44  
45  
46  
47  
48  
49  
50  
51  
52  
53  
54  
55  
56  
57  
58  
59  
60

1            This research did not receive any specific grant from funding agencies in the public,  
2 commercial, or not-for-profit sectors.

For peer review only

## References

1. (2010) 1000 Genome imputation based on the November 2010 release 1000 genome imputation general procedure, in Series 1000 Genome imputation based on the November 2010 release 1000 genome imputation general procedure.
2. Andersson C, Lyass A, Larson MG, Robins SJ, Vasan RS (2015) Low-density-lipoprotein cholesterol concentrations and risk of incident diabetes: epidemiological and genetic insights from the Framingham Heart Study. *Diabetologia* 58:2774-2780.
3. Auton A, Brooks LD, Durbin RM, Garrison EP, Kang HM, Korbel JO, Marchini JL, McCarthy S, McVean GA, Abecasis GR, Consortium GP (2015) A global reference for human genetic variation. *Nature* 526:68-74.
4. Ayina CN, Noubiap JJ, Etoundi Ngoa LS, Boudou P, Gautier JF, Mengnjo MK, Mbanya JC, Sobngwi E (2016) Association of serum leptin and adiponectin with anthropomorphic indices of obesity, blood lipids and insulin resistance in a Sub-Saharan African population. *Lipids in health and disease* 15:96.
5. Balasubramanian V, Nalini N (2006) Intraperitoneal leptin regulates lipid metabolism in ethanol supplemented *Mus musculus* heart. *Life sciences* 78:831-837.
6. Beulens JW, de Zoete EC, Kok FJ, Schaafsma G, Hendriks HF (2008) Effect of moderate alcohol consumption on adipokines and insulin sensitivity in lean and overweight men: a diet intervention study. *European journal of clinical nutrition* 62:1098-1105.
7. Campfield LA, Smith FJ, Guisez Y, Devos R, Burn P (1995) Recombinant mouse OB protein: evidence for a peripheral signal linking adiposity and central neural networks. *Science* 269:546-549.
8. Das S, Forer L, Schön herr S, Sidore C, Locke AE, Kwong A, Vrieze SI, Chew EY, Levy S, McGue M, Schlessinger D, Stambolian D, Loh PR, Iacono WG, Swaroop A, Scott LJ, Cucca F,

- 1  
2  
3 1 Kronenberg F, Boehnke M, Abecasis GR, Fuchsberger C (2016) Next-generation genotype  
4  
5 2 imputation service and methods. *Nat Genet* 48:1284-1287.  
6  
7  
8 3 9. Ebihara K, Kusakabe T, Hirata M, Masuzaki H, Miyanaga F, Kobayashi N, Tanaka T, Chusho  
9  
10 4 H, Miyazawa T, Hayashi T, Hosoda K, Ogawa Y, DePaoli AM, Fukushima M, Nakao K (2007)  
11  
12 5 Efficacy and safety of leptin-replacement therapy and possible mechanisms of leptin actions in  
13  
14 6 patients with generalized lipodystrophy. *The Journal of clinical endocrinology and metabolism*  
15  
16 7 92:532-541.  
17  
18  
19 8 10. Enser M, Ashwell M (1983) Fatty acid composition of triglycerides from adipose tissue  
20  
21 9 transplanted between obese and lean mice. *Lipids* 18:776-780.  
22  
23  
24 10 11. Friedewald WT, Levy RI, Fredrickson DS (1972) Estimation of the concentration of low-  
25  
26 11 density lipoprotein cholesterol in plasma, without use of the preparative ultracentrifuge. *Clinical*  
27  
28 12 *chemistry* 18:499-502.  
29  
30  
31 13 12. Gao L, Zhou Y, Zhong W, Zhao X, Chen C, Chen X, Gu Y, Chen J, Lv Z, Shen J (2014)  
32  
33 14 Caveolin-1 is essential for protecting against binge drinking-induced liver damage through  
34  
35 15 inhibiting reactive nitrogen species. *Hepatology* 60:687-699.  
36  
37  
38 16 13. Greco AV, Mingrone G, Favuzzi A, Capristo E, Gniuli D, Addolorato G, Brunani A,  
39  
40 17 Cavagnin F, Gasbarrini G (2000) Serum leptin levels in post-hepatitis liver cirrhosis. *Journal of*  
41  
42 18 *hepatology* 33:38-42.  
43  
44  
45 19 14. Halaas JL, Gajiwala KS, Maffei M, Cohen SL, Chait BT, Rabinowitz D, Lallone RL, Burley  
46  
47 20 SK, Friedman JM (1995) Weight-reducing effects of the plasma protein encoded by the obese  
48  
49 21 gene. *Science* 269:543-546.  
50  
51  
52 22 15. Harris RB (2014) Direct and indirect effects of leptin on adipocyte metabolism. *Biochimica*  
53  
54 23 *et biophysica acta* 1842:414-423.  
55  
56  
57  
58  
59  
60

- 1  
2  
3 1 16. Henriksen JH, Holst JJ, Moller S, Brinch K, Bendtsen F (1999) Increased circulating leptin in  
4  
5 2 alcoholic cirrhosis: relation to release and disposal. *Hepatology* 29:1818-1824.  
6  
7 3 17. Hynes GR, Jones PJ (2001) Leptin and its role in lipid metabolism. *Curr Opin Lipidol*  
8  
9 4 12:321-327.  
10  
11 5 18. Jaleel F, Jaleel A, Rahman MA, Alam E (2006) Comparison of adiponectin, leptin and blood  
12  
13 6 lipid levels in normal and obese postmenopausal women. *J Pak Med Assoc* 56:391-394.  
14  
15 7 19. Javor ED, Cochran EK, Musso C, Young JR, Depaoli AM, Gorden P (2005) Long-term  
16  
17 8 efficacy of leptin replacement in patients with generalized lipodystrophy. *Diabetes* 54:1994-  
18  
19 9 2002.  
20  
21 10 20. Jürimäe T, Jürimäe J, Leppik A, Tafeit E, Kums T (2010) Relationships between adiponectin,  
22  
23 11 leptin, and blood lipids in physically active postmenopausal females. *Am J Hum Biol* 22:609-  
24  
25 12 612.  
26  
27 13 21. Kamran F, Rother KI, Cochran E, Safar Zadeh E, Gorden P, Brown RJ (2012) Consequences  
28  
29 14 of stopping and restarting leptin in an adolescent with lipodystrophy. *Hormone research in*  
30  
31 15 *paediatrics* 78:320-325.  
32  
33 16 22. Kannel WB, Sorlie P (1979) Some health benefits of physical activity. The Framingham  
34  
35 17 Study. *Archives of internal medicine* 139:857-861.  
36  
37 18 23. Kavazarakis E, Moustaki M, Gourgiotis D, Drakatos A, Bossios A, Zeis PM, Xatzidimoula  
38  
39 19 A, Karpathios T (2001) Relation of serum leptin levels to lipid profile in healthy children.  
40  
41 20 *Metabolism* 50:1091-1094.  
42  
43 21 24. Kilpelainen TO, Carli JF, Skowronski AA, Sun Q, Kriebel J, Feitosa MF, Hedman AK,  
44  
45 22 Drong AW, Hayes JE, Zhao J, Pers TH, Schick U, Grarup N, Kutalik Z, Trompet S, Mangino M,  
46  
47 23 Kristiansson K, Beekman M, Lyytikäinen LP, Eriksson J, Henneman P, Lahti J, Tanaka T, Luan  
48  
49  
50  
51  
52  
53  
54  
55  
56  
57  
58  
59  
60

1  
2  
3 1 J, Del Greco MF, Pasko D, Renstrom F, Willems SM, Mahajan A, Rose LM, Guo X, Liu Y,  
4  
5 2 Kleber ME, Perusse L, Gaunt T, Ahluwalia TS, Ju Sung Y, Ramos YF, Amin N, Amuzu A,  
6  
7 3 Barroso I, Bellis C, Blangero J, Buckley BM, Bohringer S, YD IC, de Craen AJ, Crosslin DR,  
8  
9 4 Dale CE, Dastani Z, Day FR, Deelen J, Delgado GE, Demirkan A, Finucane FM, Ford I, Garcia  
10  
11 5 ME, Gieger C, Gustafsson S, Hallmans G, Hankinson SE, Havulinna AS, Herder C, Hernandez  
12  
13 6 D, Hicks AA, Hunter DJ, Illig T, Ingelsson E, Ioan-Facsinay A, Jansson JO, Jenny NS,  
14  
15 7 Jorgensen ME, Jorgensen T, Karlsson M, Koenig W, Kraft P, Kwekkeboom J, Laatikainen T,  
16  
17 8 Ladwig KH, LeDuc CA, Lowe G, Lu Y, Marques-Vidal P, Meisinger C, Menni C, Morris AP,  
18  
19 9 Myers RH, Mannisto S, Nalls MA, Paternoster L, Peters A, Pradhan AD, Rankinen T,  
20  
21 10 Rasmussen-Torvik LJ, Rathmann W, Rice TK, Brent Richards J, Ridker PM, Sattar N, Savage  
22  
23 11 DB, Soderberg S, Timpson NJ, Vandenput L, van Heemst D, Uh HW, Vohl MC, Walker M,  
24  
25 12 Wichmann HE, Widen E, Wood AR, Yao J, Zeller T, Zhang Y, Meulenbelt I, Kloppenburg M,  
26  
27 13 Astrup A, Sorensen TI, Sarzynski MA, Rao DC, Jousilahti P, Vartiainen E, Hofman A,  
28  
29 14 Rivadeneira F, Uitterlinden AG, Kajantie E, Osmond C, Palotie A, Eriksson JG, Heliovaara M,  
30  
31 15 Knekt PB, Koskinen S, Jula A, Perola M, Huupponen RK, Viikari JS, Kahonen M, Lehtimaki T,  
32  
33 16 Raitakari OT, Mellstrom D, Lorentzon M, Casas JP, Bandinelli S, Marz W, Isaacs A, van Dijk  
34  
35 17 KW, van Duijn CM, Harris TB, Bouchard C, Allison MA, Chasman DI, Ohlsson C, Lind L,  
36  
37 18 Scott RA, Langenberg C, Wareham NJ, Ferrucci L, Frayling TM, Pramstaller PP, Borecki IB,  
38  
39 19 Waterworth DM, Bergmann S, Waeber G, Vollenweider P, Vestergaard H, Hansen T, Pedersen  
40  
41 20 O, Hu FB, Eline Slagboom P, Grallert H, Spector TD, Jukema JW, Klein RJ, Schadt EE, Franks  
42  
43 21 PW, Lindgren CM, Leibel RL, Loos RJ (2016) Genome-wide meta-analysis uncovers novel loci  
44  
45 22 influencing circulating leptin levels. Nature communications 7:10494.  
46  
47  
48  
49  
50  
51  
52  
53  
54  
55  
56  
57  
58  
59  
60

- 1  
2  
3 1 25. Kosztaczky B, Foris G, Paragh G, Jr., Seres I, Zsiros E, Koncsos P, Balogh Z, Paragh G  
4  
5 2 (2007) Leptin stimulates endogenous cholesterol synthesis in human monocytes: New role of an  
6  
7 3 old player in atherosclerotic plaque formation. *Leptin-induced increase in cholesterol synthesis.*  
8  
9 4 *The international journal of biochemistry & cell biology* 39:1637-1645.
- 11  
12 5 26. Maddalozzo GF, Turner RT, Edwards CH, Howe KS, Widrick JJ, Rosen CJ, Iwaniec UT  
13  
14 6 (2009) Alcohol alters whole body composition, inhibits bone formation, and increases bone  
15  
16 7 marrow adiposity in rats. *Osteoporosis international : a journal established as result of*  
17  
18 8 *cooperation between the European Foundation for Osteoporosis and the National Osteoporosis*  
19  
20 9 *Foundation of the USA* 20:1529-1538.
- 23  
24 10 27. Nicolas JM, Fernandez-Sola J, Fatjo F, Casamitjana R, Bataller R, Sacanella E, Tobias E,  
25  
26 11 Badia E, Estruch R (2001) Increased circulating leptin levels in chronic alcoholism. *Alcoholism,*  
27  
28 12 *clinical and experimental research* 25:83-88.
- 30  
31 13 28. Otaka M, Konishi N, Odashima M, Jin M, Wada I, Matsuhashi T, Ohba R, Watanabe S  
32  
33 14 (2007) Effect of alcohol consumption on leptin level in serum, adipose tissue, and gastric  
34  
35 15 mucosa. *Digestive diseases and sciences* 52:3066-3069.
- 37  
38 16 29. Palmer TM, Sterne JA, Harbord RM, Lawlor DA, Sheehan NA, Meng S, Granell R, Smith  
39  
40 17 GD, Didelez V (2011) Instrumental variable estimation of causal risk ratios and causal odds  
41  
42 18 ratios in Mendelian randomization analyses. *Am J Epidemiol* 173:1392-1403.
- 44  
45 19 30. Park JY, Javor ED, Cochran EK, DePaoli AM, Gorden P (2007) Long-term efficacy of leptin  
46  
47 20 replacement in patients with Dunnigan-type familial partial lipodystrophy. *Metabolism: clinical*  
48  
49 21 *and experimental* 56:508-516.
- 51  
52 22 31. Paz-Filho G, Mastronardi CA, Licinio J (2015) Leptin treatment: facts and expectations.  
53  
54 23 *Metabolism: clinical and experimental* 64:146-156.

- 1  
2  
3 1 32. Pravdova E, Macho L, Fickova M (2009) Alcohol intake modifies leptin, adiponectin and  
4  
5 2 resistin serum levels and their mRNA expressions in adipose tissue of rats. *Endocrine regulations*  
6  
7 3 43:117-125.  
8  
9  
10 4 33. Rao DC, Sung YJ, Winkler TW, Schwander K, Borecki I, Cupples LA, Gauderman WJ, Rice  
11  
12 5 K, Munroe PB, Psaty BM, Group\* CG-LIW (2017) Multiancestry Study of Gene-Lifestyle  
13  
14 6 Interactions for Cardiovascular Traits in 610 475 Individuals From 124 Cohorts: Design and  
15  
16 7 Rationale. *Circ Cardiovasc Genet* 10.  
17  
18  
19 8 34. Rojdmarm S, Calissendorff J, Brismar K (2001) Alcohol ingestion decreases both diurnal and  
20  
21 9 nocturnal secretion of leptin in healthy individuals. *Clinical endocrinology* 55:639-647.  
22  
23  
24 10 35. Roth MJ, Baer DJ, Albert PS, Castonguay TW, Dorgan JF, Dawsey SM, Brown ED,  
25  
26 11 Hartman TJ, Campbell WS, Giffen CA, Judd JT, Taylor PR (2003) Relationship between serum  
27  
28 12 leptin levels and alcohol consumption in a controlled feeding and alcohol ingestion study.  
29  
30 13 *Journal of the National Cancer Institute* 95:1722-1725.  
31  
32  
33 14 36. Sainz N, Barrenetxe J, Moreno-Aliaga MJ, Martinez JA (2015) Leptin resistance and diet-  
34  
35 15 induced obesity: central and peripheral actions of leptin. *Metabolism: clinical and experimental*  
36  
37 16 64:35-46.  
38  
39  
40 17 37. Santolaria F, Perez-Cejas A, Aleman MR, Gonzalez-Reimers E, Milena A, de la Vega MJ,  
41  
42 18 Martinez-Riera A, Gomez-Rodriguez MA (2003) Low serum leptin levels and malnutrition in  
43  
44 19 chronic alcohol misusers hospitalized by somatic complications. *Alcohol and alcoholism* 38:60-  
45  
46 20 66.  
47  
48  
49 21 38. Sekhar RV, Jahoor F, Iyer D, Guthikonda A, Paraniyam J, Elhaj F, Coraza I,  
50  
51 22 Balasubramanyam A (2012) Leptin replacement therapy does not improve the abnormal lipid  
52  
53  
54  
55  
56  
57  
58  
59  
60

- 1  
2  
3 1 kinetics of hypoleptinemic patients with HIV-associated lipodystrophy syndrome. *Metabolism*  
4  
5 2 61:1395-1403.  
6  
7  
8 3 39. Selenscig D, Rossi A, Chicco A, Lombardo YB (2010) Increased leptin storage with altered  
9  
10 4 leptin secretion from adipocytes of rats with sucrose-induced dyslipidemia and insulin resistance:  
11  
12 5 effect of dietary fish oil. *Metabolism: clinical and experimental* 59:787-795.  
13  
14  
15 6 40. Singh P, Peterson TE, Sert-Kuniyoshi FH, Glenn JA, Davison DE, Romero-Corral A,  
16  
17 7 Pusalavidyasagar S, Jensen MD, Somers VK (2012) Leptin signaling in adipose tissue: role in  
18  
19 8 lipid accumulation and weight gain. *Circ Res* 111:599-603.  
20  
21  
22 9 41. Slomiany BL, Slomiany A (2009) Role of epidermal growth factor receptor transactivation in  
23  
24 10 the activation of cytosolic phospholipase A(2) in leptin protection of salivary gland acinar cells  
25  
26 11 against ethanol cytotoxicity. *Journal of physiology and pharmacology : an official journal of the*  
27  
28 12 *Polish Physiological Society* 60:49-55.  
29  
30  
31 13 42. Splansky GL, Corey D, Yang Q, Atwood LD, Cupples LA, Benjamin EJ, D'Agostino RB,  
32  
33 14 Sr., Fox CS, Larson MG, Murabito JM, O'Donnell CJ, Vasan RS, Wolf PA, Levy D (2007) The  
34  
35 15 Third Generation Cohort of the National Heart, Lung, and Blood Institute's Framingham Heart  
36  
37 16 Study: design, recruitment, and initial examination. *American journal of epidemiology*  
38  
39 17 165:1328-1335.  
40  
41  
42 18 43. Tan X, Sun X, Li Q, Zhao Y, Zhong W, Sun X, Jia W, McClain CJ, Zhou Z (2012) Leptin  
43  
44 19 deficiency contributes to the pathogenesis of alcoholic fatty liver disease in mice. *The American*  
45  
46 20 *journal of pathology* 181:1279-1286.  
47  
48  
49 21 44. Voican CS, Njike-Nakseu M, Boujedidi H, Barri-Ova N, Bouchet-Delbos L, Agostini H,  
50  
51 22 Maitre S, Prevot S, Cassard-Doulicier AM, Naveau S, Perlemuter G (2015) Alcohol withdrawal  
52  
53  
54  
55  
56  
57  
58  
59  
60



- 1  
2  
3 1 alleviates adipose tissue inflammation in patients with alcoholic liver disease. *Liver international*  
4  
5 2 : official journal of the International Association for the Study of the Liver 35:967-978.  
6  
7  
8 3 45. Wang MY, Lee Y, Unger RH (1999) Novel form of lipolysis induced by leptin. *The Journal*  
9  
10 4 of biological chemistry 274:17541-17544.  
11  
12 5 46. Wannamethee SG, Tchernova J, Whincup P, Lowe GD, Kelly A, Rumley A, Wallace AM,  
13  
14 6 Sattar N (2007) Plasma leptin: associations with metabolic, inflammatory and haemostatic risk  
15  
16 7 factors for cardiovascular disease. *Atherosclerosis* 191:418-426.  
17  
18  
19 8 47. Wu DM, Shen MH, Chu NF (2001) Relationship between plasma leptin levels and lipid  
20  
21 9 profiles among school children in Taiwan--the Taipei Children Heart Study. *European journal of*  
22  
23 10 epidemiology 17:911-916.  
24  
25  
26 11 48. Yu HC, Li SY, Cao MF, Jiang XY, Feng L, Zhao JJ, Gao L (2010) Effects of chronic ethanol  
27  
28 12 consumption on levels of adipokines in visceral adipose tissues and sera of rats. *Acta*  
29  
30 13 pharmacologica Sinica 31:461-469.  
31  
32  
33 14 49. Zhang Y, Proenca R, Maffei M, Barone M, Leopold L, Friedman JM (1994) Positional  
34  
35 15 cloning of the mouse obese gene and its human homologue. *Nature* 372:425-432.  
36  
37  
38  
39  
40  
41  
42  
43  
44  
45  
46  
47  
48  
49  
50  
51  
52  
53  
54  
55  
56  
57  
58  
59  
60

### Figure legends

**Figure 1.** The relationship between leptin, genetic risk score for leptin and triglycerides (TG) in Framingham Heart Study the 3<sup>rd</sup> Generation cohort.

For peer review only

**Table 1. Characteristics of the Study Participants by Genetic Risk Score 1 (GRS1)<sup>a</sup> for logarithmically transformed Leptin in Framingham Heart Study 3<sup>rd</sup> Generation Cohort.**

| Covariates                                                   | Overall     | Quartiles of the leptin GRS |             |             |             | P       |
|--------------------------------------------------------------|-------------|-----------------------------|-------------|-------------|-------------|---------|
|                                                              | (n=3,860)   | Q1 (n=964)                  | Q2 (n=961)  | Q3 (n=977)  | Q4 (n=958)  |         |
| Genetic risk score, mean (SD)                                | 0.07 (0.03) | 0.03(0.02)                  | 0.06 (0.01) | 0.08 (0.01) | 0.11 (0.01) |         |
| Age, years, mean (SD)                                        | 40.2 (8.9)  | 40.5 (8.7)                  | 39.9 (8.8)  | 40.3 (9.1)  | 39.9 (8.8)  | 0.23    |
| Male, N (%)                                                  | 1808 (46.8) | 453 (47.0)                  | 437 (45.5)  | 460 (47.1)  | 458 (47.8)  | 0.89    |
| Education levels, N (%)                                      |             |                             |             |             |             |         |
| <i>No more than high school</i>                              | 591 (15.4)  | 141 (14.7)                  | 146 (15.3)  | 157 (16.1)  | 147 (15.4)  |         |
| <i>Some college</i>                                          | 1213 (31.5) | 306 (31.8)                  | 287 (30.0)  | 313 (32.1)  | 307 (32.3)  | 0.22    |
| <i>Bachelor's degree and above</i>                           | 2041 (53.1) | 514 (53.5)                  | 524 (54.8)  | 505 (51.8)  | 498 (52.3)  |         |
| Current Smoker, N (%)                                        | 603 (15.6)  | 144 (15.0)                  | 152 (15.8)  | 165 (16.9)  | 142 (14.8)  | 0.53    |
| Current Drinker, N (%)                                       | 3419 (89.1) | 858 (89.4)                  | 853 (89.1)  | 863 (88.9)  | 845 (89.0)  | 0.32    |
| Physical Activities index score, mean(SD)                    | 37.5 (7.9)  | 37.8 (8.0)                  | 37.3 (8.1)  | 37.4 (7.7)  | 37.4 (7.8)  | 0.51    |
| BMI, kg/m <sup>2</sup> , mean (SD)                           | 26.9 (5.5)  | 26.9 (5.5)                  | 26.7 (5.5)  | 26.9 (5.5)  | 27.1 (5.5)  | 0.94    |
| Waist girth, inches, mean (SD)                               | 36.6 (6.0)  | 36.7 (6.0)                  | 36.3 (5.8)  | 36.7 (5.9)  | 36.8 (6.1)  | 0.70    |
| Treated for Lipids, N (%)                                    | 265 (6.9)   | 80 (8.3)                    | 56 (5.8)    | 66 (6.8)    | 63 (6.6)    | 0.26    |
| Treated for Diabetes, N (%)                                  | 72 (1.9)    | 22 (2.3)                    | 23 (2.4)    | 19 (1.9)    | 8 (0.8)     | 0.03    |
| Log-leptin, mean (SD)                                        | 2.0 (1.1)   | 2.0 (1.0)                   | 2.0 (1.1)   | 2.0 (1.0)   | 2.1 (1.1)   | 0.02    |
| Age, sex, BMI and waist girth adjusted log-leptin, mean (SD) | 2.0 (1.1)   | 2.0 (1.0)                   | 2.0 (1.1)   | 2.0 (1.0)   | 2.1 (1.1)   | 0.00005 |

BMI=body mass index; Log-leptin=logarithmically transformed leptin; GRS=Genetic Risk Score; SD=standard deviation.

<sup>a</sup> Genetic risk scores 1(GRS1) for leptin was generated by summing leptin increasing alleles of 3 SNPs adjusted for BMI, weighted by their corresponding effect sizes reported by Kilpelainen et al.

**Table 2. Association of BMI independent Leptin GRS1<sup>a</sup> with Baseline Lipids among Overall, Drinking, and Non-Drinking Participants of the Framingham Heart Study 3<sup>rd</sup> Generation Cohort, Respectively.**

|                          | Age, sex, BMI, waist adjusted model |      | $P_{\text{interaction}}^b$ | Fully adjusted model <sup>c</sup> |       | $P_{\text{interaction}}^d$ |
|--------------------------|-------------------------------------|------|----------------------------|-----------------------------------|-------|----------------------------|
|                          | Beta( SE)                           | $P$  |                            | Beta( SE)                         | $P$   |                            |
| <b>HDL-C</b>             |                                     |      |                            |                                   |       |                            |
| Overall                  | 5.42 (7.10)                         | 0.44 |                            | 7.79 (7.11)                       | 0.27  |                            |
| Not current drinkers     | 20.42 (18.29)                       | 0.26 | 0.74                       | 22.22 (18.76)                     | 0.24  | 0.71                       |
| Current drinkers         | 6.00 (7.61)                         | 0.43 |                            | 7.02 (7.64)                       | 0.36  |                            |
| <b>LDL-C</b>             |                                     |      |                            |                                   |       |                            |
| Overall                  | -0.11 (16.09)                       | 0.99 |                            | -1.09 (16.24)                     | 0.95  |                            |
| Not current drinkers     | 3.37 (48.63)                        | 0.94 | 0.79                       | -4.18 (50.10)                     | 0.93  | 0.93                       |
| Current drinkers         | -0.14 (17.10)                       | 0.99 |                            | -1.80 (17.18)                     | 0.92  |                            |
| <b>Log-TG</b>            |                                     |      |                            |                                   |       |                            |
| Overall                  | -0.66 (0.26)                        | 0.01 |                            | -0.69 (0.26)                      | 0.008 |                            |
| Not current drinkers     | -1.41 (0.80)                        | 0.08 | 0.31                       | -1.32 (0.82)                      | 0.11  | 0.32                       |
| Current drinkers         | -0.58 (0.27)                        | 0.04 |                            | -0.61 (0.27)                      | 0.03  |                            |
| <b>Total cholesterol</b> |                                     |      |                            |                                   |       |                            |
| Overall                  | -12.50 (18.21)                      | 0.49 |                            | -12.58 (18.31)                    | 0.49  |                            |
| Not current drinkers     | -15.20 (54.11)                      | 0.78 | 0.96                       | -19.13 (55.66)                    | 0.73  | 0.86                       |
| Current drinkers         | -10.20 (19.37)                      | 0.60 |                            | -11.43 (19.42)                    | 0.56  |                            |

GRS=Genetic Risk Score; HDL-C =High-density lipoprotein cholesterol; LDL-C =Low-density lipoprotein cholesterol; log-TG=logarithmically transformed triglycerides; SE=standard error.

<sup>a</sup> Genetic risk scores1 (GRS1) for leptin was generated by summing leptin increasing alleles of 3 SNPs adjusted for body mass index (BMI), weighted by their corresponding effect sizes reported by Kilpelainen et al;

<sup>b</sup> Assessed by adding an interaction term, drinking×GRS along with the drinking variable to the age, sex, BMI and waist adjusted model among the overall participants;

<sup>c</sup> Adjusted for age, sex, education, smoking, drinking, BMI, waist, and physical activity among the overall sample;

<sup>d</sup> Assessed by adding an interaction term, drinking×GRS to the fully adjusted model among the overall participants.

**Table 3. Association of BMI dependent Leptin GRS<sup>2a</sup> with Baseline Lipids among Overall, Drinking, and Non-Drinking Participants of the Framingham Heart Study 3<sup>rd</sup> Generation Cohort, Respectively.**

|                      | Age, sex, BMI, waist adjusted model |       | $P_{\text{interaction}}^b$ | Fully adjusted model <sup>c</sup> |       | $P_{\text{interaction}}^d$ |
|----------------------|-------------------------------------|-------|----------------------------|-----------------------------------|-------|----------------------------|
|                      | Beta( SE)                           | $P$   |                            | Beta( SE)                         | $P$   |                            |
| HDL-C                |                                     |       |                            |                                   |       |                            |
| Overall              | -10.67 (6.20)                       | 0.09  |                            | -10.98 (6.22)                     | 0.08  |                            |
| Not current drinkers | -0.69 (16.31)                       | 0.97  | 0.56                       | 0.82 (16.55)                      | 0.96  | 0.52                       |
| Current drinkers     | -12.15 (6.64)                       | 0.07  |                            | -11.94 (6.68)                     | 0.07  |                            |
| LDL-C                |                                     |       |                            |                                   |       |                            |
| Overall              | -2.11 (14.05)                       | 0.88  |                            | -2.81 (14.21)                     | 0.84  |                            |
| Not current drinkers | -92.51 (43.02)                      | 0.03  | 0.03                       | -101.15 (43.78)                   | 0.02  | 0.02                       |
| Current drinkers     | 9.21 (14.91)                        | 0.54  |                            | 7.89 (15.02)                      | 0.60  |                            |
| log-TG               |                                     |       |                            |                                   |       |                            |
| Overall              | -0.59 (0.23)                        | 0.009 |                            | -0.59 (0.23)                      | 0.01  |                            |
| Not current drinkers | -2.07 (0.71)                        | 0.004 | 0.03                       | -2.03 (0.72)                      | 0.005 | 0.03                       |
| Current drinkers     | -0.40 (0.24)                        | 0.09  |                            | -0.42 (0.24)                      | 0.08  |                            |
| Total cholesterol    |                                     |       |                            |                                   |       |                            |
| Overall              | -28.05 (15.91)                      | 0.08  |                            | -28.74 (16.02)                    | 0.07  |                            |
| Not current drinkers | -144.68 (47.61)                     | 0.003 | 0.02                       | -151.32 (48.37)                   | 0.002 | 0.01                       |
| Current drinkers     | -13.19 (16.90)                      | 0.44  |                            | -14.67 (16.98)                    | 0.39  |                            |

GRS=Genetic Risk Score; HDL-C =High-density lipoprotein cholesterol; LDL-C =Low-density lipoprotein cholesterol; log-TG=logarithmically transformed triglycerides; SE=standard error.

<sup>a</sup> Genetic risk scores<sup>2</sup> (GRS<sup>2</sup>) for leptin was generated by summing leptin increasing alleles of 3 SNPs unadjusted for body mass index (BMI), weighted by their corresponding effect sizes reported by Kilpelainen et al;

<sup>b</sup> Assessed by adding an interaction term, drinking×GRS along with the drinking variable to the age, sex, BMI and waist adjusted model among the overall participants;

<sup>c</sup> Adjusted for age, sex, education, smoking, drinking, BMI, waist, and physical activity among the overall sample;

<sup>d</sup> Assessed by adding an interaction term, drinking×GRS to the fully adjusted model among the overall participants.

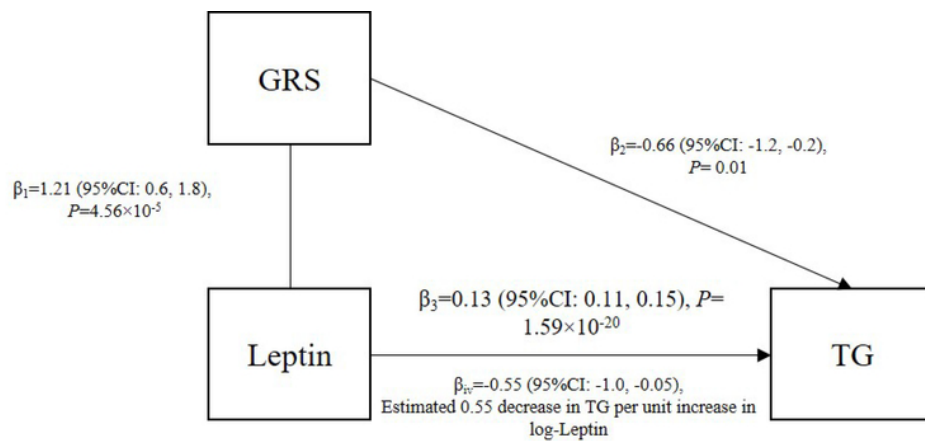

Figure 1

66x29mm (300 x 300 DPI)

1  
2  
3  
4  
5  
6  
7  
8  
9  
10  
11  
12  
13  
14  
15  
16  
17  
18  
19  
20  
21  
22  
23  
24  
25  
26  
27  
28  
29  
30  
31  
32  
33  
34  
35  
36  
37  
38  
39  
40  
41  
42  
43  
44  
45  
46  
47

**Supplemental Table S1. Basic Information of three SNPs for BMI independent leptin GRS1<sup>a</sup> reaching genome-wide significance ( $P < 5 \times 10^{-8}$ )**

| Chromosome  |            | Coded  | Non-coded | Nearest        |                |         |                   |
|-------------|------------|--------|-----------|----------------|----------------|---------|-------------------|
| Position    | rsID       | Allele | Allele    | R <sup>2</sup> | Function       | Gene    | Population        |
| 2:27742603  | rs780093   | C      | T         | 0.995          | intron variant | GCKR    | European American |
| 7:127860163 | rs10487505 | G      | C         | 0.989          | intron variant | LEP     | European American |
| 20:37333012 | rs6071166  | C      | A         | 0.973          | intergenic     | SLC32A1 | European American |

BMI=body mass index

<sup>a</sup> Genetic risk scores 1 (GRS1) for leptin was generated by summing leptin increasing alleles of 3 SNPs adjusted for body mass index (BMI), weighted by their corresponding effect sizes reported by Kilpelainen et al.

**Supplemental Table S2. Basic Information of three SNPs for BMI dependent leptin GRS2<sup>a</sup> reaching genome-wide significance (P<5×10<sup>-8</sup>)**

| Chromosome  |           | Coded  | Non-coded | Nearest        |                      |       |                   |
|-------------|-----------|--------|-----------|----------------|----------------------|-------|-------------------|
| Position    | rsID      | Allele | Allele    | R <sup>2</sup> | Function             | Gene  | Population        |
| 2:27742603  | rs780093  | C      | T         | 0.995          | intron variant       | GCKR  | European American |
| 3:156798775 | rs900400  | T      | C         | 0.691          | upstream variant 2KB | CCNL1 | European American |
| 16:53813450 | rs8043757 | A      | T         | 0.999          | intron variant       | FTO   | European American |

BMI=body mass index

<sup>a</sup> Genetic risk scores 2 (GRS2) for leptin was generated by summing leptin increasing alleles of 3 SNPs unadjusted for body mass index (BMI), weighted by their corresponding effect sizes reported by Kilpelainen et al.



**Supplemental Table S3. Association of BMI independent Leptin GRS1<sup>a</sup> with Baseline Lipids among Overall, Drinking, and Non-Drinking Participants without treating for Lipids of the Framingham Heart Study 3<sup>rd</sup> Generation Cohort, Respectively.**

|                      | Age, sex, BMI, waist adjusted model |          | <i>P</i> <sub>interaction</sub> <sup>b</sup> | Fully adjusted model <sup>c</sup> |          | <i>P</i> <sub>interaction</sub> <sup>d</sup> |
|----------------------|-------------------------------------|----------|----------------------------------------------|-----------------------------------|----------|----------------------------------------------|
|                      | Beta( SE)                           | <i>P</i> |                                              | Beta( SE)                         | <i>P</i> |                                              |
| HDL-C                |                                     |          |                                              |                                   |          |                                              |
| Overall              | 5.25 (7.44)                         | 0.48     |                                              | 7.59 (7.47)                       | 0.31     |                                              |
| Not current drinkers | 18.83 (19.59)                       | 0.34     | 0.86                                         | 20.43 (20.23)                     | 0.31     | 0.83                                         |
| Current drinkers     | 6.22 (7.97)                         | 0.44     |                                              | 7.19 (8)                          | 0.37     |                                              |
| LDL-C                |                                     |          |                                              |                                   |          |                                              |
| Overall              | 14.86 (16.06)                       | 0.35     |                                              | 13.43 (16.2)                      | 0.41     |                                              |
| Not current drinkers | 36.1 (49.22)                        | 0.46     | 0.51                                         | 27.18 (50.69)                     | 0.59     | 0.61                                         |
| Current drinkers     | 12.19 (17.05)                       | 0.47     |                                              | 10.48 (17.11)                     | 0.54     |                                              |
| log-TG               |                                     |          |                                              |                                   |          |                                              |
| Overall              | -0.69 (0.27)                        | 0.01     |                                              | -0.72 (0.27)                      | 0.007    |                                              |
| Not current drinkers | -1.72 (0.84)                        | 0.04     | 0.20                                         | -1.61 (0.86)                      | 0.06     | 0.21                                         |
| Current drinkers     | -0.58 (0.28)                        | 0.04     |                                              | -0.6 (0.28)                       | 0.03     |                                              |

## Total cholesterol

|                      |               |      |      |               |      |      |
|----------------------|---------------|------|------|---------------|------|------|
| Overall              | -0.09 (18.19) | 1.00 |      | -0.67 (18.26) | 0.97 |      |
| Not current drinkers | 3.78 (55.05)  | 0.95 | 0.94 | -2.29 (56.42) | 0.97 | 0.97 |
| Current drinkers     | 0.98 (19.29)  | 0.96 |      | -0.34 (19.32) | 0.99 |      |

BMI=body mass index; GRS=Genetic Risk Score; HDL-C=High-density lipoprotein cholesterol; LDL-C=Low-density lipoprotein cholesterol; log-TG=logarithmically transformed triglycerides; SE=standard error

<sup>a</sup> Genetic risk scores 1 (GRS1) for leptin was generated by summing leptin increasing alleles of 3 SNPs adjusted for body mass index (BMI), weighted by their corresponding effect sizes reported by Kilpelainen et al;

<sup>b</sup> Assessed by adding an interaction term, drinking×GRS along with the drinking variable to the age, sex, BMI and waist adjusted model among the overall participants;

<sup>c</sup> Adjusted for age, sex, education, smoking, drinking, BMI, waist, and physical activity among the overall sample;

<sup>d</sup> Assessed by adding an interaction term, drinking×GRS to the fully adjusted model among the overall participants.

**Supplemental Table S4. Association of BMI dependent Leptin GRS2<sup>a</sup> with Baseline Lipids among Overall, Drinking, and Non-Drinking Participants without treating for Lipids of the Framingham Heart Study 3<sup>rd</sup> Generation Cohort, Respectively.**

|                          | Age, sex, BMI, waist adjusted model |          |                                              | Fully adjusted model <sup>c</sup> |          |                                              |
|--------------------------|-------------------------------------|----------|----------------------------------------------|-----------------------------------|----------|----------------------------------------------|
|                          | Beta( SE)                           | <i>P</i> | <i>P</i> <sub>interaction</sub> <sup>b</sup> | Beta( SE)                         | <i>P</i> | <i>P</i> <sub>interaction</sub> <sup>d</sup> |
| <b>HDL-C</b>             |                                     |          |                                              |                                   |          |                                              |
| Overall                  | -9.73 (6.50)                        | 0.13     |                                              | -9.66 (6.53)                      | 0.14     |                                              |
| Not current drinkers     | -2.61 (17.44)                       | 0.88     | 0.72                                         | -1.22 (17.77)                     | 0.95     | 0.68                                         |
| Current drinkers         | -10.52 (6.94)                       | 0.13     |                                              | -10.19 (6.99)                     | 0.15     |                                              |
| <b>LDL-C</b>             |                                     |          |                                              |                                   |          |                                              |
| Overall                  | -0.42 (14.02)                       | 0.98     |                                              | -1.56 (14.17)                     | 0.91     |                                              |
| Not current drinkers     | -83.19 (43.58)                      | 0.06     | 0.07                                         | -94.12 (44.22)                    | 0.03     | 0.05                                         |
| Current drinkers         | 9.71 (14.86)                        | 0.51     |                                              | 7.61 (14.96)                      | 0.61     |                                              |
| <b>log-TG</b>            |                                     |          |                                              |                                   |          |                                              |
| Overall                  | -0.63 (0.23)                        | 0.007    |                                              | -0.63 (0.23)                      | 0.007    |                                              |
| Not current drinkers     | -2.09 (0.74)                        | 0.005    | 0.04                                         | -2.00 (0.75)                      | 0.008    | 0.05                                         |
| Current drinkers         | -0.45 (0.25)                        | 0.07     |                                              | -0.47 (0.25)                      | 0.05     |                                              |
| <b>Total cholesterol</b> |                                     |          |                                              |                                   |          |                                              |

|                      |                 |       |      |                 |       |      |
|----------------------|-----------------|-------|------|-----------------|-------|------|
| Overall              | -25.28 (15.87)  | 0.11  |      | -26.38 (15.97)  | 0.10  |      |
| Not current drinkers | -136.15 (48.44) | 0.005 | 0.03 | -144.29 (48.92) | 0.003 | 0.02 |
| Current drinkers     | -10.96 (16.82)  | 0.51  |      | -13.64 (16.90)  | 0.42  |      |

BMI=body mass index; GRS=Genetic Risk Score; HDL-C=High-density lipoprotein cholesterol; LDL-C=Low-density lipoprotein cholesterol; log-TG=logarithmically transformed triglycerides; SE=standard error

<sup>a</sup> Genetic risk scores 2 (GRS2) for leptin was generated by summing leptin increasing alleles of 3 SNPs unadjusted for body mass index (BMI), weighted by their corresponding effect sizes reported by Kilpelainen et al;

<sup>b</sup> Assessed by adding an interaction term, drinking×GRS along with the drinking variable to the age, sex, BMI and waist adjusted model among the overall participants;

<sup>c</sup> Adjusted for age, sex, education, smoking, drinking, BMI, waist, and physical activity among the overall sample;

<sup>d</sup> Assessed by adding an interaction term, drinking×GRS to the fully adjusted model among the overall participants.

1  
2  
3  
4  
5  
6  
7  
8  
9  
10  
11  
12  
13  
14  
15  
16  
17  
18  
19  
20  
21  
22  
23  
24  
25  
26  
27  
28  
29  
30  
31  
32  
33  
34  
35  
36  
37  
38  
39  
40  
41  
42  
43  
44  
45  
46  
47

**Supplemental Table S5. Association of BMI independent Leptin GRS1<sup>a</sup> with Baseline Lipids among Overall, Drinking, and Non-Drinking Participants without treating for Lipids and Diabetes of the Framingham Heart Study 3<sup>rd</sup> Generation Cohort, Respectively.**

|                      | Age, sex, BMI, waist adjusted model |      |                                       | Fully adjusted model <sup>c</sup> |      |                                       |
|----------------------|-------------------------------------|------|---------------------------------------|-----------------------------------|------|---------------------------------------|
|                      | Beta( SE)                           | P    | P <sub>interaction</sub> <sup>b</sup> | Beta( SE)                         | P    | P <sub>interaction</sub> <sup>d</sup> |
| <b>HDL-C</b>         |                                     |      |                                       |                                   |      |                                       |
| Overall              | 5.64 (7.47)                         | 0.45 |                                       | 8.00 (7.49)                       | 0.29 |                                       |
| Not current drinkers | 20.89 (19.62)                       | 0.29 | 0.72                                  | 22.51 (20.25)                     | 0.27 | 0.69                                  |
| Current drinkers     | 6.22 (7.98)                         | 0.44 |                                       | 7.17 (8.02)                       | 0.37 |                                       |
| <b>LDL-C</b>         |                                     |      |                                       |                                   |      |                                       |
| Overall              | 15.29 (16.11)                       | 0.34 |                                       | 13.42 (16.27)                     | 0.41 |                                       |
| Not current drinkers | 33.51 (49.77)                       | 0.50 | 0.58                                  | 24.63 (51.26)                     | 0.63 | 0.68                                  |
| Current drinkers     | 12.68 (17.09)                       | 0.46 |                                       | 10.99 (17.16)                     | 0.52 |                                       |
| <b>log-TG</b>        |                                     |      |                                       |                                   |      |                                       |
| Overall              | -0.66 (0.27)                        | 0.01 |                                       | -0.69 (0.27)                      | 0.01 |                                       |
| Not current drinkers | -1.60 (0.85)                        | 0.06 | 0.23                                  | -1.46 (0.86)                      | 0.09 | 0.25                                  |
| Current drinkers     | -0.57 (0.28)                        | 0.04 |                                       | -0.59 (0.28)                      | 0.04 |                                       |

## Total cholesterol

|                      |              |      |      |              |      |      |
|----------------------|--------------|------|------|--------------|------|------|
| Overall              | 1.17 (18.24) | 0.95 |      | 0.14 (18.33) | 0.99 |      |
| Not current drinkers | 6.19 (55.64) | 0.91 | 0.93 | 1.04 (57.03) | 0.99 | 0.99 |
| Current drinkers     | 1.56 (19.35) | 0.94 |      | 0.26 (19.38) | 0.99 |      |

BMI=body mass index; GRS=Genetic Risk Score; HDL-C =High-density lipoprotein cholesterol; LDL-C =Low-density lipoprotein cholesterol; log-TG=logarithmically transformed triglycerides; SE=standard error

<sup>a</sup> Genetic risk scores 1 (GRS1) for leptin was generated by summing leptin increasing alleles of 3 SNPs adjusted for body mass index (BMI), weighted by their corresponding effect sizes reported by Kilpelainen et al;

<sup>b</sup> Assessed by adding an interaction term, drinking×GRS along with the drinking variable to the age, sex, BMI and waist adjusted model among the overall participants;

<sup>c</sup> Adjusted for age, sex, education, smoking, drinking, BMI, waist, and physical activity among the overall sample;

<sup>d</sup> Assessed by adding an interaction term, drinking×GRS to the fully adjusted model among the overall participants.

**Supplemental Table S6. Association of BMI dependent Leptin GRS2<sup>a</sup> with Baseline Lipids among Overall, Drinking, and Non-Drinking Participants without treating for Lipids and Diabetes of the Framingham Heart Study 3<sup>rd</sup> Generation Cohort, respectively.**

|                      | Age, sex, BMI, waist adjusted model |          | <i>P</i> <sub>interaction<sup>b</sup></sub> | Fully adjusted model <sup>c</sup> |          | <i>P</i> <sub>interaction<sup>d</sup></sub> |
|----------------------|-------------------------------------|----------|---------------------------------------------|-----------------------------------|----------|---------------------------------------------|
|                      | Beta( SE)                           | <i>P</i> |                                             | Beta( SE)                         | <i>P</i> |                                             |
| <b>HDL-C</b>         |                                     |          |                                             |                                   |          |                                             |
| Overall              | -10.39 (6.52)                       | 0.11     |                                             | -10.48 (6.55)                     | 0.11     |                                             |
| Not current drinkers | -8.18 (17.54)                       | 0.64     | 0.95                                        | -7.77 (17.87)                     | 0.66     | 0.92                                        |
| Current drinkers     | -10.58 (6.96)                       | 0.13     |                                             | -10.32 (7.01)                     | 0.14     |                                             |
| <b>LDL-C</b>         |                                     |          |                                             |                                   |          |                                             |
| Overall              | -1.58 (14.07)                       | 0.91     |                                             | -3.3 (14.22)                      | 0.82     |                                             |
| Not current drinkers | -95.04 (44.19)                      | 0.03     | 0.04                                        | -105.66 (44.81)                   | 0.02     | 0.03                                        |
| Current drinkers     | 8.84 (14.90)                        | 0.55     |                                             | 6.84 (15.00)                      | 0.65     |                                             |
| <b>log-TG</b>        |                                     |          |                                             |                                   |          |                                             |
| Overall              | -0.62 (0.23)                        | 0.008    |                                             | -0.62 (0.23)                      | 0.008    |                                             |
| Not current drinkers | -2.00 (0.75)                        | 0.008    | 0.06                                        | -1.87 (0.76)                      | 0.01     | 0.08                                        |

|                      |                 |       |      |                 |       |      |
|----------------------|-----------------|-------|------|-----------------|-------|------|
| Current drinkers     | -0.45 (0.25)    | 0.07  |      | -0.48 (0.25)    | 0.05  |      |
| Total cholesterol    |                 |       |      |                 |       |      |
| Overall              | -26.72 (15.92)  | 0.09  |      | -28.67 (16.03)  | 0.07  |      |
| Not current drinkers | -150.52 (49.04) | 0.002 | 0.01 | -158.43 (49.51) | 0.002 | 0.01 |
| Current drinkers     | -12.06 (16.87)  | 0.47  |      | -14.69 (16.95)  | 0.39  |      |

BMI=body mass index; GRS=Genetic Risk Score; HDL-C=High-density lipoprotein cholesterol; LDL-C=Low-density lipoprotein cholesterol; log-TG=logarithmically transformed triglycerides; SE=standard error

<sup>a</sup> Genetic risk scores 2 (GRS2) for leptin was generated by summing leptin increasing alleles of 3 SNPs unadjusted for body mass index (BMI), weighted by their corresponding effect sizes reported by Kilpelainen et al;

<sup>b</sup> Assessed by adding an interaction term, drinking×GRS along with the drinking variable to the age, sex, BMI and waist adjusted model among the overall participants;

<sup>c</sup> Adjusted for age, sex, education, smoking, drinking, BMI, waist, and physical activity among the overall sample;

<sup>d</sup> Assessed by adding an interaction term, drinking×GRS to the fully adjusted model among the overall participants.



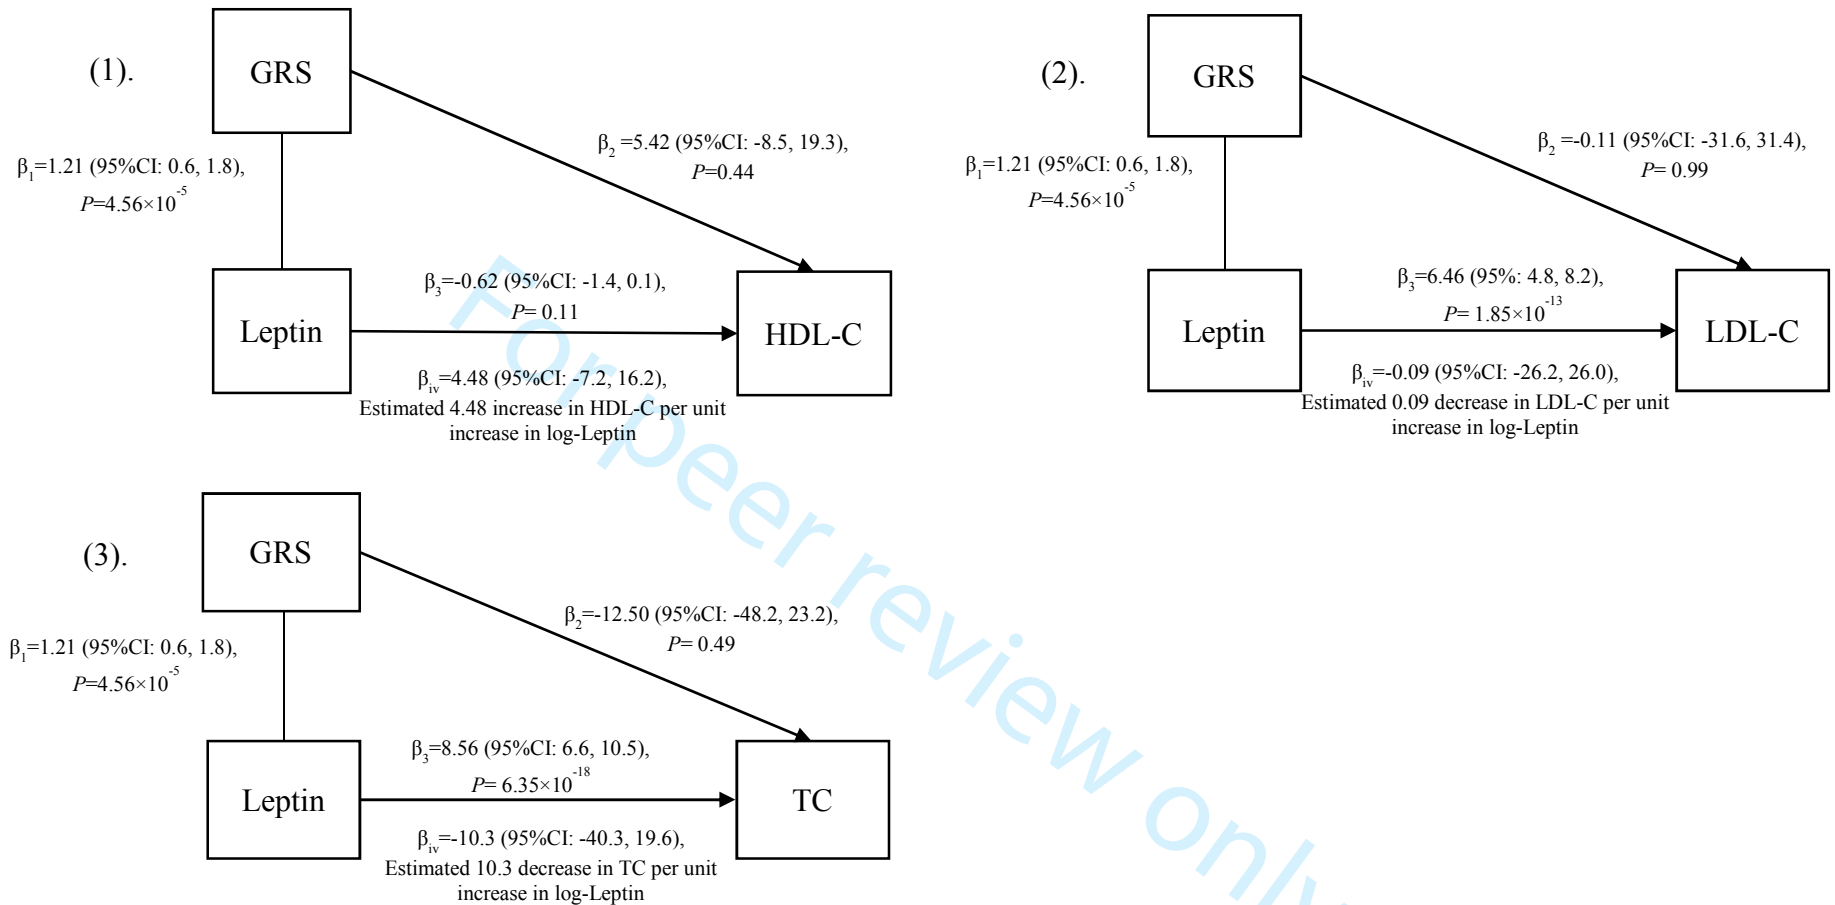

Supplemental Figure S1. The relationship between Leptin, Genetic Risk Score 1 (GRS1) for Leptin and Lipids in Framingham

Heart Study the 3<sup>rd</sup> Generation cohort.

1. The relationship between leptin, genetic risk score for leptin and high density lipoprotein cholesterol (HDL-C)
2. The relationship between leptin, genetic risk score for leptin and low density lipoprotein cholesterol (LDL-C)
3. The relationship between leptin, genetic risk score for leptin and total cholesterol (TC)

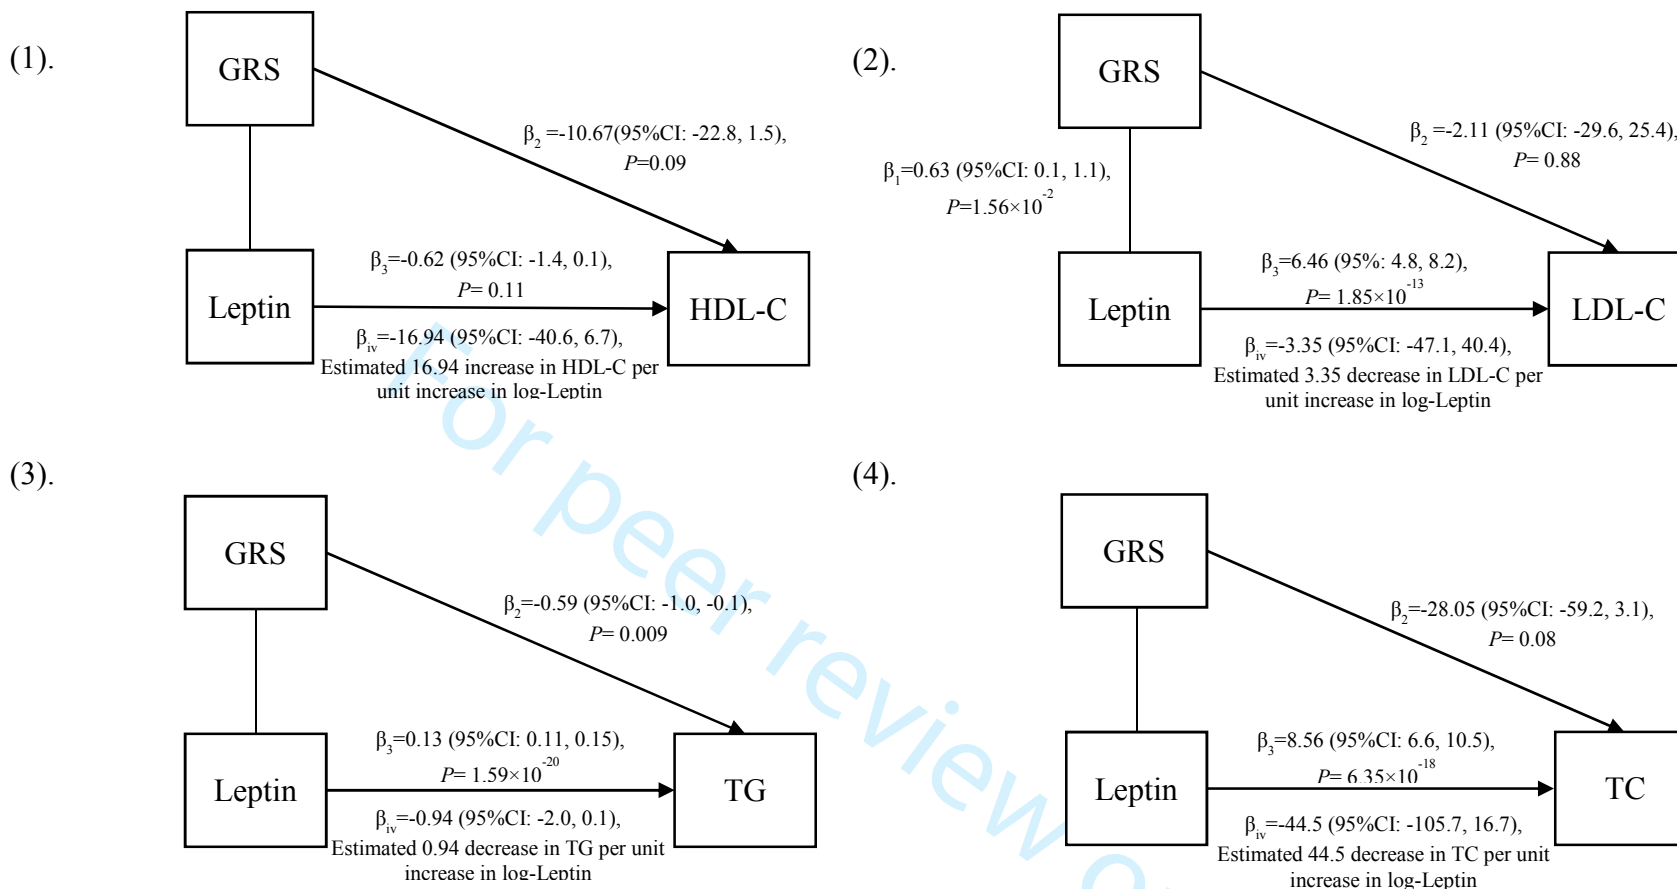

**Supplemental Figure S2. The relationship between Leptin, Genetic Risk Score 2 (GRS2) for Leptin and Lipids in Framingham Heart Study the 3<sup>rd</sup> Generation cohort.**

1. The relationship between leptin, genetic risk score for leptin and high density lipoprotein cholesterol (HDL-C)
2. The relationship between leptin, genetic risk score for leptin and low density lipoprotein cholesterol (LDL-C)
3. The relationship between leptin, genetic risk score for leptin and triglycerides (TG)

1  
2  
3  
4  
5  
6  
7  
8  
9  
10  
11  
12  
13  
14  
15  
16  
17  
18  
19  
20  
21  
22  
23  
24  
25  
26  
27  
28  
29  
30  
31  
32  
33  
34  
35  
36  
37  
38  
39  
40  
41  
42  
43  
44  
45  
46  
47

4. The relationship between leptin, genetic risk score for leptin and total cholesterol (TC)

For peer review only

# Reporting checklist for genetic association study.

Based on the STREGA guidelines.

## Instructions to authors

Complete this checklist by entering the page numbers from your manuscript where readers will find each of the items listed below.

Your article may not currently address all the items on the checklist. Please modify your text to include the missing information. If you are certain that an item does not apply, please write "n/a" and provide a short explanation.

Upload your completed checklist as an extra file when you submit to a journal.

In your methods section, say that you used the STREGA reporting guidelines, and cite them as:

Little J, Higgins JP, Ioannidis JP, Moher D, Gagnon F, von Elm E, Khoury MJ, Cohen B, Davey-Smith G, Grimshaw J, Scheet P, Gwinn M, Williamson RE, Zou GY, Hutchings K, Johnson CY, Tait V, Wiens M, Golding J, van Duijn C, McLaughlin J, Paterson A, Wells G, Fortier I, Freedman M, Zecevic M, King R, Infante-Rivard C, Stewart A, Birkett N; STrengthening the REporting of Genetic Association Studies. STrengthening the REporting of Genetic Association Studies (STREGA): An Extension of the STROBE Statement.

|          |     | Reporting Item                                                                                                                                                    | Page Number |
|----------|-----|-------------------------------------------------------------------------------------------------------------------------------------------------------------------|-------------|
| Title    | #1a | Indicate the study's design with a commonly used term in the title or the abstract                                                                                | 1           |
| Abstract | #1b | Provide in the abstract an informative and balanced summary of what was done and what was found                                                                   | 2           |
|          | #2  | Explain the scientific background and rationale for the investigation being reported                                                                              | 4           |
|          | #3  | State specific objectives, including any prespecified hypotheses. State if the study is the first report of a genetic association, a replication effort, or both. | 5           |
|          | #4  | Present key elements of study design early in the paper                                                                                                           | 5           |
|          | #5  | Describe the setting, locations, and relevant dates, including periods of recruitment, exposure, follow-up, and data collection                                   | 5-6         |

|    |      |                                                                                                                                            |     |
|----|------|--------------------------------------------------------------------------------------------------------------------------------------------|-----|
| 1  | #6a  | Cohort study – Give the eligibility criteria, and the sources and methods                                                                  | 5-6 |
| 2  |      | of selection of participants. Describe methods of follow-up. Case-control                                                                  |     |
| 3  |      | study – Give the eligibility criteria, and the sources and methods of case                                                                 |     |
| 4  |      | ascertainment and control selection. Give the rationale for the choice of                                                                  |     |
| 5  |      | cases and controls. Cross-sectional study – Give the eligibility criteria,                                                                 |     |
| 6  |      | and the sources and methods of selection of participants. Give                                                                             |     |
| 7  |      | information on the criteria and methods for selection of subsets of                                                                        |     |
| 8  |      | participants from a larger study, when relevant.                                                                                           |     |
| 9  |      |                                                                                                                                            |     |
| 10 |      |                                                                                                                                            |     |
| 11 |      |                                                                                                                                            |     |
| 12 |      |                                                                                                                                            |     |
| 13 |      |                                                                                                                                            |     |
| 14 | #6b  | Cohort study – For matched studies, give matching criteria and number                                                                      | n/a |
| 15 |      | of exposed and unexposed. Case-control study – For matched studies,                                                                        |     |
| 16 |      | give matching criteria and the number of controls per case.                                                                                |     |
| 17 |      |                                                                                                                                            |     |
| 18 |      |                                                                                                                                            |     |
| 19 | #7a  | Clearly define all outcomes, exposures, predictors, potential                                                                              | 7-8 |
| 20 |      | confounders, and effect modifiers. Give diagnostic criteria, if applicable                                                                 |     |
| 21 |      |                                                                                                                                            |     |
| 22 |      |                                                                                                                                            |     |
| 23 | #7b  | Clearly define genetic exposures (genetic variants) using a widely-used                                                                    | 6-7 |
| 24 |      | nomenclature system. Identify variables likely to be associated with                                                                       |     |
| 25 |      | population stratification (confounding by ethnic origin).                                                                                  |     |
| 26 |      |                                                                                                                                            |     |
| 27 |      |                                                                                                                                            |     |
| 28 | #8a  | For each variable of interest give sources of data and details of methods                                                                  | 5-6 |
| 29 |      | of assessment (measurement). Describe comparability of assessment                                                                          |     |
| 30 |      | methods if there is more than one group. Give information separately for                                                                   |     |
| 31 |      | for exposed and unexposed groups if applicable.                                                                                            |     |
| 32 |      |                                                                                                                                            |     |
| 33 |      |                                                                                                                                            |     |
| 34 |      |                                                                                                                                            |     |
| 35 | #8b  | Describe laboratory methods, including source and storage of DNA,                                                                          | 6-7 |
| 36 |      | genotyping methods and platforms (including the allele calling algorithm                                                                   |     |
| 37 |      | used, and its version), error rates and call rates. State the laboratory /                                                                 |     |
| 38 |      | centre where genotyping was done. Describe comparability of laboratory                                                                     |     |
| 39 |      | methods if there is more than one group. Specify whether genotypes                                                                         |     |
| 40 |      | were assigned using all of the data from the study simultaneously or in                                                                    |     |
| 41 |      | smaller batches.                                                                                                                           |     |
| 42 |      |                                                                                                                                            |     |
| 43 |      |                                                                                                                                            |     |
| 44 |      |                                                                                                                                            |     |
| 45 |      |                                                                                                                                            |     |
| 46 | #9a  | Describe any efforts to address potential sources of bias                                                                                  | 8-9 |
| 47 |      |                                                                                                                                            |     |
| 48 | #9b  | Describe any efforts to address potential sources of bias                                                                                  | 8-9 |
| 49 |      |                                                                                                                                            |     |
| 50 |      |                                                                                                                                            |     |
| 51 | #10  | Explain how the study size was arrived at                                                                                                  | 5-6 |
| 52 |      |                                                                                                                                            |     |
| 53 | #11  | Explain how quantitative variables were handled in the analyses. If                                                                        | 6   |
| 54 |      | applicable, describe which groupings were chosen, and why. If                                                                              |     |
| 55 |      | applicable, describe how effects of treatment were dealt with.                                                                             |     |
| 56 |      |                                                                                                                                            |     |
| 57 |      |                                                                                                                                            |     |
| 58 |      |                                                                                                                                            |     |
| 59 | #12a | Describe all statistical methods, including those used to control for                                                                      | 8-9 |
| 60 |      | For peer review only - <a href="http://bmjopen.bmj.com/site/about/guidelines.xhtml">http://bmjopen.bmj.com/site/about/guidelines.xhtml</a> |     |

|    |                                                                                 |      |
|----|---------------------------------------------------------------------------------|------|
| 1  | confounding. State software version used and options (or settings)              |      |
| 2  | chosen.                                                                         |      |
| 3  |                                                                                 |      |
| 4  | #12b Describe any methods used to examine subgroups and interactions            | 9    |
| 5  |                                                                                 |      |
| 6  | #12c Explain how missing data were addressed                                    | 9    |
| 7  |                                                                                 |      |
| 8  | #12d If applicable, explain how loss to follow-up was addressed                 | n/a  |
| 9  |                                                                                 |      |
| 10 |                                                                                 |      |
| 11 | #12e Describe any sensitivity analyses                                          | 9    |
| 12 |                                                                                 |      |
| 13 | #12f State whether Hardy-Weinberg equilibrium was considered and, if so,        | 7    |
| 14 | how.                                                                            |      |
| 15 |                                                                                 |      |
| 16 |                                                                                 |      |
| 17 | #12g Describe any methods used for inferring genotypes or haplotypes            | 7    |
| 18 |                                                                                 |      |
| 19 | #12h Describe any methods used to assess or address population                  | 7    |
| 20 | stratification.                                                                 |      |
| 21 |                                                                                 |      |
| 22 |                                                                                 |      |
| 23 | #12i Describe any methods used to address multiple comparisons or to            | 7    |
| 24 | control risk of false positive findings.                                        |      |
| 25 |                                                                                 |      |
| 26 |                                                                                 |      |
| 27 | #12j Describe any methods used to address and correct for relatedness           | n/a  |
| 28 | among subjects                                                                  |      |
| 29 |                                                                                 |      |
| 30 |                                                                                 |      |
| 31 | #13a Report numbers of individuals at each stage of study—eg numbers            | 5-6  |
| 32 | potentially eligible, examined for eligibility, confirmed eligible, included in |      |
| 33 | the study, completing follow-up, and analysed. Give information                 |      |
| 34 | separately for for exposed and unexposed groups if applicable. Report           |      |
| 35 | numbers of individuals in whom genotyping was attempted and numbers             |      |
| 36 | of individuals in whom genotyping was successful.                               |      |
| 37 |                                                                                 |      |
| 38 |                                                                                 |      |
| 39 |                                                                                 |      |
| 40 |                                                                                 |      |
| 41 | #13b Give reasons for non-participation at each stage                           | n/a  |
| 42 |                                                                                 |      |
| 43 | #13c Consider use of a flow diagram                                             | n/a  |
| 44 |                                                                                 |      |
| 45 | #14a Give characteristics of study participants (eg demographic, clinical,      | 9-10 |
| 46 | social) and information on exposures and potential confounders. Give            |      |
| 47 | information separately for exposed and unexposed groups if applicable.          |      |
| 48 | Consider giving information by genotype                                         |      |
| 49 |                                                                                 |      |
| 50 |                                                                                 |      |
| 51 |                                                                                 |      |
| 52 | #14b Indicate number of participants with missing data for each variable of     | 9-10 |
| 53 | interest                                                                        |      |
| 54 |                                                                                 |      |
| 55 |                                                                                 |      |
| 56 | #14c Cohort study – Summarize follow-up time, e.g. average and total            | n/a  |
| 57 | amount.                                                                         |      |
| 58 |                                                                                 |      |
| 59 |                                                                                 |      |
| 60 |                                                                                 |      |

- 1 #15 Cohort study Report numbers of outcome events or summary measures 9/10  
 2 over time. Give information separately for exposed and unexposed  
 3 groups if applicable. Report outcomes (phenotypes) for each genotype  
 4 category over time Case-control study – Report numbers in each  
 5 exposure category, or summary measures of exposure. Give information  
 6 separately for cases and controls . Report numbers in each genotype  
 7 category. Cross-sectional study – Report numbers of outcome events or  
 8 summary measures. Give information separately for exposed and  
 9 unexposed groups if applicable. Report outcomes (phenotypes) for each  
 10 genotype category  
 11  
 12  
 13  
 14  
 15  
 16  
 17 #16a Give unadjusted estimates and, if applicable, confounder-adjusted 10-11  
 18 estimates and their precision (eg, 95% confidence interval). Make clear  
 19 which confounders were adjusted for and why they were included  
 20  
 21  
 22 #16b Report category boundaries when continuous variables were categorized 10-11  
 23  
 24 #16c If relevant, consider translating estimates of relative risk into absolute 10-11  
 25 risk for a meaningful time period  
 26  
 27  
 28 #16d Report results of any adjustments for multiple comparisons 10-11  
 29  
 30 #17a Report other analyses done—e.g., analyses of subgroups and 10-11  
 31 interactions, and sensitivity analyses  
 32  
 33 #17b Report other analyses done—e.g., analyses of subgroups and 10-11  
 34 interactions, and sensitivity analyses  
 35  
 36 #17c Report other analyses done—e.g., analyses of subgroups and 10-11  
 37 interactions, and sensitivity analyses  
 38  
 39  
 40 #18 Summarise key results with reference to study objectives 11-13  
 41  
 42  
 43 #19 Discuss limitations of the study, taking into account sources of potential 13-14  
 44 bias or imprecision. Discuss both direction and magnitude of any  
 45 potential bias.  
 46  
 47  
 48 #20 Give a cautious overall interpretation considering objectives, limitations, 14  
 49 multiplicity of analyses, results from similar studies, and other relevant  
 50 evidence.  
 51  
 52  
 53 #21 Discuss the generalisability (external validity) of the study results 14  
 54  
 55  
 56 #22 Give the source of funding and the role of the funders for the present 15  
 57  
 58  
 59

1 study and, if applicable, for the original study on which the present article  
2 is based  
3

4 The STREGA checklist is distributed under the terms of the Creative Commons Attribution License  
5 CC-BY. This checklist was completed on 22. September 2018 using <http://www.goodreports.org/>, a  
6 tool made by the [EQUATOR Network](#) in collaboration with [Penelope.ai](#)  
7  
8  
9  
10  
11  
12  
13  
14  
15  
16  
17  
18  
19  
20  
21  
22  
23  
24  
25  
26  
27  
28  
29  
30  
31  
32  
33  
34  
35  
36  
37  
38  
39  
40  
41  
42  
43  
44  
45  
46  
47  
48  
49  
50  
51  
52  
53  
54  
55  
56  
57  
58  
59  
60



# BMJ Open

## The association between genetically determined leptin and blood lipids considering alcohol consumption: a Mendelian randomization study

|                                 |                                                                                                                                                                                                                                                                                                                                                                                                                                                                                                                                                                                                                                                                                                                                                                                                                         |
|---------------------------------|-------------------------------------------------------------------------------------------------------------------------------------------------------------------------------------------------------------------------------------------------------------------------------------------------------------------------------------------------------------------------------------------------------------------------------------------------------------------------------------------------------------------------------------------------------------------------------------------------------------------------------------------------------------------------------------------------------------------------------------------------------------------------------------------------------------------------|
| Journal:                        | <i>BMJ Open</i>                                                                                                                                                                                                                                                                                                                                                                                                                                                                                                                                                                                                                                                                                                                                                                                                         |
| Manuscript ID                   | bmjopen-2018-026860.R1                                                                                                                                                                                                                                                                                                                                                                                                                                                                                                                                                                                                                                                                                                                                                                                                  |
| Article Type:                   | Original research                                                                                                                                                                                                                                                                                                                                                                                                                                                                                                                                                                                                                                                                                                                                                                                                       |
| Date Submitted by the Author:   | 04-Jun-2019                                                                                                                                                                                                                                                                                                                                                                                                                                                                                                                                                                                                                                                                                                                                                                                                             |
| Complete List of Authors:       | Shen, Luqi; University of Georgia College of Public Health, Department of Epidemiology and Biostatistics<br>Cordero, José ; University of Georgia College of Public Health, Department of Epidemiology and Biostatistics<br>Wang, Jia-Sheng; University of Georgia College of Public Health, Department of Environmental Health Science<br>Shen, Ye; University of Georgia College of Public Health, Department of Epidemiology and Biostatistics<br>Li, Shengxu; Children's Hospitals and Clinics of Minnesota, Children's Minnesota Research Institute<br>Liang, Lirong; Beijing Chaoyang Hospital<br>Zou, Zhiyong; Peking University School of Public Health, Institute of Child and Adolescent Health<br>Li, Changwei; University of Georgia College of Public Health, Department of Epidemiology and Biostatistics |
| <b>Primary Subject Heading</b>: | Epidemiology                                                                                                                                                                                                                                                                                                                                                                                                                                                                                                                                                                                                                                                                                                                                                                                                            |
| Secondary Subject Heading:      | Public health, Genetics and genomics                                                                                                                                                                                                                                                                                                                                                                                                                                                                                                                                                                                                                                                                                                                                                                                    |
| Keywords:                       | EPIDEMIOLOGY, leptin, lipids, alcohol consumption, genetic risk score                                                                                                                                                                                                                                                                                                                                                                                                                                                                                                                                                                                                                                                                                                                                                   |
|                                 |                                                                                                                                                                                                                                                                                                                                                                                                                                                                                                                                                                                                                                                                                                                                                                                                                         |

SCHOLARONE™  
Manuscripts

1  
2  
3 1 **The association between genetically determined leptin and blood lipids considering alcohol**  
4  
5 2 **consumption: a Mendelian randomization study**  
6  
7

8 3 **Running title: Genetically determined leptin and lipids**  
9

10  
11 4 Luqi Shen<sup>a</sup>, José F. Cordero<sup>a</sup>, Jia-Sheng Wang<sup>b</sup>, Ye Shen<sup>a</sup>, Shengxu Li<sup>c</sup>, Lirong Liang<sup>d</sup>, Zhi-  
12  
13 5 Yong Zou<sup>e</sup>, Changwei Li<sup>a</sup>  
14  
15

16  
17 6 **Author names and affiliations:**  
18

- 19  
20 7 a. Department of Epidemiology and Biostatistics, College of Public Health, University of  
21  
22 8 Georgia, Health Sciences Campus, 101 Buck Road, Athens, GA 30602, USA.  
23  
24 9 b. Department of Environmental Health Science, College of Public Health, University of  
25  
26 10 Georgia, 150 East Green Street, Athens, GA 30602, USA.  
27  
28 11 c. Children's Minnesota Research Institute, Children's Hospitals and Clinics of Minnesota,  
29  
30 12 Minneapolis, MN 55404, USA.  
31  
32 13 d. Clinical Epidemiology and Tobacco Dependence Treatment Research Department,  
33  
34 14 Beijing Institute of Respiratory Medicine, Beijing Chaoyang Hospital, Capital Medical  
35  
36 15 University, Beijing, China;  
37  
38 16 e. Institute of Child and Adolescent Health, School of Public Health, Peking University,  
39  
40 17 The Public Health Building in Peking University Health Science Center, Beijing 100191,  
41  
42 18 China  
43  
44  
45  
46  
47  
48  
49

50 20 **Corresponding authors:**  
51  
52  
53  
54  
55  
56  
57  
58  
59  
60

1 **Changwei Li**, Department of Epidemiology and Biostatistics, College of Public Health,  
2 University of Georgia, 120 B.S. Miller Hall, Health Sciences Campus, 101 Buck Road, Athens,  
3 GA 30602, USA. Telephone: 706.583.0918, Email: [changwei.li@uga.edu](mailto:changwei.li@uga.edu)

4 **Zhi-Yong Zou**, Institute of Child and Adolescent Health, School of Public Health, Peking  
5 University, The Public Health Building in Peking University Health Science Center, 38 Xue  
6 Yuan Road, Haidian District, Beijing 100191, China. Email: [harveyzou2002@bjmu.edu.cn](mailto:harveyzou2002@bjmu.edu.cn);

7  
8 **Word count: 3,356**

## Abstract

**Objectives:** The objective of this study was to evaluate the association of genetically determined leptin with lipids.

**Design:** We conducted a Mendelian randomization study to assess a potential causal relationship between serum leptin and lipid levels. We also evaluated whether alcohol drinking modified the associations of genetically determined leptin with blood lipids.

**Setting and Participants:** 3,860 participants of the Framingham Heart Study 3<sup>rd</sup> Generation cohort.

**Results:** Both genetic risk scores (GRSs), the GRS generated using leptin loci independent of body mass index (BMI) and GRS generated using leptin loci dependent of BMI, were positively associated with log transformed leptin (log-leptin). The BMI independent leptin GRS was associated with log transformed triglycerides (log-TG) ( $\beta=-0.66$ ,  $p=0.01$ ), but not low density lipoprotein cholesterol (LDL-C) ( $p=0.99$ ), high density lipoprotein cholesterol (HDL-C) ( $p=0.44$ ), or total cholesterol (TC) ( $p=0.49$ ). Instrumental variable estimation showed that per unit increase in genetically determined log-leptin was associated with 0.55 (95% confidence interval: 0.05-1.00) units decrease in log-TG. Besides significant association with log-TG ( $\beta=-0.59$ ,  $p=0.009$ ), the BMI dependent GRS was nominally associated with HDL-C ( $\beta=-10.67$ ,  $p=0.09$ ) and TC ( $\beta=-28.05$ ,  $p=0.08$ ). When stratified by drinking status, the BMI dependent GRS was associated with reduced levels of LDL-C ( $p=0.03$ ), log-TG ( $p=0.004$ ), and TC ( $p=0.003$ ) among non-current drinkers only. Significant interactions between the BMI dependent GRS and alcohol drinking were identified for LDL-C ( $p=0.03$ ), TG ( $p=0.03$ ), and TC ( $p=0.02$ ).

**Conclusion:** These findings together indicated that genetically determined leptin reduced lipid levels and the association may be modified by alcohol consumption.

1  
2  
3 **1 Keywords:** leptin, lipids, alcohol consumption, genetic risk score  
4  
5

6 **2 Strengths and limitations of this study:**  
7

- 8  
9 • Population-based Mendelian randomization studies may offer an opportunity to provide  
10  
11 better evidence for the association of leptin with lipid metabolism in the adult population  
12  
13 compared with observational epidemiology studies.  
14  
15  
16 • The stringent quality control methods were used in measuring genotypes, phenotype, and  
17  
18 covariates in the current study to reduce measurement error and increase the statistical  
19  
20 power.  
21  
22  
23 • Pleiotropy effects of SNPs included in the leptin genetic risk score (GRS) may confound  
24  
25 the leptin GRS and lipids associations.  
26  
27  
28 • Our analyses were restricted to individuals of European ancestry.  
29  
30  
31  
32  
33  
34  
35  
36  
37  
38  
39  
40  
41  
42  
43  
44  
45  
46  
47  
48  
49  
50  
51  
52  
53  
54  
55  
56  
57  
58  
59  
60

## Introduction

1  
2  
3  
4  
5  
6  
7  
8  
9  
10  
11  
12  
13  
14  
15  
16  
17  
18  
19  
20  
21  
22  
23  
24  
25  
26  
27  
28  
29  
30  
31  
32  
33  
34  
35  
36  
37  
38  
39  
40  
41  
42  
43  
44  
45  
46  
47  
48  
49  
50  
51  
52  
53  
54  
55  
56  
57  
58  
59  
60

1  
2  
3  
4  
5  
6  
7  
8  
9  
10  
11  
12  
13  
14  
15  
16  
17  
18  
19  
20  
21  
22  
23  
24  
25  
26  
27  
28  
29  
30  
31  
32  
33  
34  
35  
36  
37  
38  
39  
40  
41  
42  
43  
44  
45  
46  
47  
48  
49  
50  
51  
52  
53  
54  
55  
56  
57  
58  
59  
60

Leptin is a key hormone that regulates appetite and food intake, body weight, and energy balance.<sup>1 2</sup> Leptin is secreted primarily from the stomach, placenta, and adipose tissue.<sup>3</sup> Biological studies have demonstrated that elevated leptin levels may play an important role in the pathogenesis of lipid accumulation.<sup>4-9</sup> As an extremely active endocrine organ, the adipose tissue secretes leptin playing a key role in immunometabolism.<sup>10</sup> Leptin can regulate both innate and adaptive immune responses.<sup>11 12</sup> Meanwhile, leptin and insulin interact to establish a regulatory feedback loop, the adipoinsular axis.<sup>13</sup> Leptin suppresses insulin synthesis and secretion from  $\beta$ -cells<sup>13</sup> and improves insulin sensitivity<sup>14</sup>. In turn, insulin can stimulate leptin secretion from adipocytes<sup>15 16</sup>. Both the immune responses and insulin are involved in lipid metabolism.<sup>17 18</sup> Case reports and case series have documented that leptin therapy can improve lipid profiles among patients with lipoatrophy or congenital leptin deficiency.<sup>19-23</sup> On contrary, in a cross-sectional survey of 12-16 years old high school students, plasma leptin was positively associated with total cholesterol (TC), high density lipoprotein cholesterol (HDL-C), low-density lipoprotein cholesterol (LDL-C), and triglycerides (TG).<sup>24</sup> Since observational epidemiologic studies cannot rule out all confounding effects, it is unclear whether such an association is causal. On the other hand, there are studies that demonstrate a neutral effect of leptin on blood lipid levels.<sup>25</sup> A small clinical trial that involved 17 patients with HIV-associated lipodystrophy suggested that leptin treatment did not improve fasting lipid kinetics.<sup>25</sup> Population-based Mendelian randomization studies may offer an opportunity to provide better evidence for the effect of leptin on lipid metabolism in the adult population. Recently, a large-scale genome-wide association study (GWAS) meta-analysis identified five genomic loci associated with circulating leptin,<sup>26</sup> which provides an opportunity to conduct a Mendelian randomization study to delineate

1 the association between serum leptin and lipids levels. In addition, alcohol consumption has been  
2 shown to influence leptin secretion in both human and animal models.<sup>27-40</sup> In rodent models,  
3 leptin has been demonstrated to be increased<sup>30-32</sup> or decreased<sup>33 34</sup> after alcohol intake.  
4 Similarly, leptin levels in human was decreased,<sup>36</sup> increased,<sup>35 37</sup> or even unchanged<sup>38-40</sup> after  
5 drinking. It is unclear whether alcohol consumption modifies the association of genetically  
6 determined leptin with lipid levels.<sup>41 42</sup>

7 Therefore, the objectives of the current study were to evaluate the relationship between  
8 genetically determined leptin and lipid levels and to explore whether the leptin-lipids  
9 associations could be modified by alcohol consumption among participants of the Framingham  
10 Heart Study (FHS) 3<sup>rd</sup> generation cohort.

## 11 **Materials and Methods**

### 12 **Data Sources and Study Participants**

13 The FHS was designed to identify common factors or characteristics that contribute to  
14 cardiovascular disease (CVD) by tracking the development of CVD over a long period of time.  
15 Participants of the FHS were free from overt symptoms of CVD or stroke at baseline. Later on,  
16 the FHS was extended to including offspring and third generation of the original participants. A  
17 detailed description of the FHS 3<sup>rd</sup> generation cohort has been outlined in previous  
18 publications.<sup>43</sup> Genotype and phenotype data of the FHS are cataloged on the database of  
19 genotype and phenotype (dbGaP) at the National Center for Biotechnology Information (NCBI).  
20 We have received approval to use the FHS data by the Institutional Review Boards at the  
21 University of Georgia and the NCBI. Circulating leptin levels, genotypes, lipid levels, and

1  
2  
3 1 important covariates were available for 3,860 (94.7%) participants of the 3<sup>rd</sup> generation cohort at  
4  
5 2 baseline in 2002-2005 (**Table 1**). Those participants were included in the current analyses.  
6  
7

### 3 **Genotyping and Genetic Risk Score**

4 Genetic loci for circulating leptin levels have been reported in a large genome-wide  
5 association studies (GWAS) meta-analysis by Kilpelainen and colleagues.<sup>26</sup> This study included  
6 32,161 individuals of European ancestry and identified three single-nucleotide polymorphisms  
7 (SNPs), *GCKR* rs780093, *LEP* rs10487505, and *SLC32A1* rs6071166, that were robustly  
8 associated with body mass index (BMI) adjusted leptin at a genome-wide significance level  
9 ( $p < 5 \times 10^{-08}$ ). In addition, *GCKR* rs780093, *CCNLI* rs900400, and *FTO* rs8043757 were  
10 associated with circulating leptin without adjustment for BMI.<sup>26</sup> We assumed the additive  
11 genetic model for each SNP and constructed two genetic risk scores (GRSs) for leptin by  
12 combining leptin-increasing alleles for SNPs weighted by their corresponding effect sizes on  
13 logarithmically transformed leptin (log-leptin) as reported in the original GWAS meta-analysis.<sup>26</sup>  
14 The first score, GRS1, was generated using the three SNPs associated with BMI adjusted leptin,  
15 and the second score, GRS2, using the three SNPs associated with leptin unadjusted for BMI.

16 Genome-wide SNPs were genotyped using Affymetrix and Illumina platforms in the  
17 FHS. The 1000 Genome genotype data for the FHS was already imputed and cataloged on the  
18 dbGaP. According to the document of the FHS,<sup>44</sup> before imputation, quality control removed  
19 SNPs with a Hardy-Weinberg equilibrium  $p < 1 \times 10^{-6}$ , a missing rate  $> 3.1\%$ , a minor allele  
20 frequency (MAF)  $< 1\%$ , a missing physical position or cannot mapped to build 37 positions,  
21 Mendelian errors  $> 1000$ , or duplicate SNPs. MACH software was used for genotype phasing,  
22 followed by imputation using MiniMac software.<sup>45 46</sup> Imputation results were summarized as



1 dosage scores, which represent the expected numbers of copies of the coded allele for each SNP,  
2 ranging from 0 to 2. After imputation, SNPs with  $r^2 < 0.30$ , an MAF  $< 1\%$ , or a Hardy-Weinberg  
3 equilibrium  $p < 1 \times 10^{-6}$  were removed. We retrieved genotypes of the SNPs for GRSs from the  
4 imputed data for all study participants (**Supplemental Table S1 and Supplemental Table S2**).

## 5 **Leptin and Lipids measurement**

6 In the FHS, blood samples were collected after overnight fasting and analyzed following  
7 standard protocols.<sup>47</sup> Serum leptin levels were determined by enzyme-linked immunosorbent  
8 assay (ELISA) method at R&D Systems using the Quantikine Human Leptin Immunoassay.<sup>47</sup>  
9 Leptin was logarithmically transformed for analyses in the current study.

10 Fasting blood lipids, including TC, HDL-C, and TG, were measured using automated  
11 enzymatic assays.<sup>47</sup> For participants taking lipid-lowering medications, TC was adjusted as  
12 TC/0.8.<sup>48</sup> After adjustment, LDL-C was calculated using the Friedewald formula.<sup>49</sup> The adjusted  
13 TC and LDL-C and logarithmically transformed TG (log-TG) were used for analyses in the  
14 current study.

## 15 **Covariates**

16 Demographic and health behavioral variables, including age, gender, education, smoking,  
17 and drinking, were based on self-report. Education levels were categorized into “no more than  
18 high school,” “some college,” and “bachelor’s degree or above.” Smoking was categorized into  
19 “current smoker” or “not a current smoker” and drinking status into “current drinker” and “not a  
20 current drinker.” Physical activity was measured with the physical activity index composite  
21 score, which was calculated by summing the number of hours spent in each activity intensity

1 level weighted by their corresponding weight factor derived from the estimated oxygen  
2 consumption requirement for each intensity level.<sup>50</sup> BMI was calculated as weight in kilograms  
3 divided by the square of height in meters. Waist circumference was measured to next lower 1/4  
4 inch by regional anthropometry.

## 5 **Statistical Analysis**

6 Weighted GRSs for leptin were calculated for each participant as the sum of the products  
7 of the participant's dosage scores for each SNP and the SNP's estimated effect size. Since  
8 obesity is highly associated with both leptin and blood lipids, our main focus was on GRS1, the  
9 score generated using loci associated with leptin independent of BMI. The GRS1 for participants  
10 was then categorized into quartiles. Means and standard deviations for continuous and  
11 frequencies and percentages for categorical characteristics at baseline were calculated for each  
12 quartile of the GRS1. *p* values for linear trends in those variables across quartiles of the GRS1  
13 were estimated.

14 Three multivariate linear regression models were used to assess associations between log-  
15 leptin and lipids, leptin GRS and log-leptin, and the leptin GRS and lipids, respectively. All  
16 models were adjusted for age, sex, BMI, and waist circumference. To test robustness of the  
17 leptin GRS and lipids associations, we additionally controlled for education, smoking, drinking,  
18 and physical activity index score in the fully adjusted models. To explore whether associations  
19 between the leptin GRS and lipids levels were modified by alcohol consumption, we performed  
20 stratified analyses by drinking status. In each stratum of the drinking status, we tested  
21 associations between leptin GRS and lipids by adjusting for age, sex, BMI, and waist  
22 circumference in the base model and additionally adjusting for education, smoking, and physical

1 activity in the full model. Interactions between the leptin GRS and alcohol consumption were  
2 tested among the overall participants by adding drinking and the interaction term, GRS×drinking,  
3 to the models. All the above analyses were done for GRS1 and GRS2 separately. We quantified  
4 the strength of the causal association of leptin with lipids using the instrumental variable  
5 estimator.<sup>51</sup> The estimator was calculated as the ratio of the coefficient for leptin GRS and lipids  
6 association to the coefficient for the leptin GRS and log-leptin association from the base models.

7 To rule out the effect of lipid-lowering medications, sensitivity analyses were performed  
8 among those not taking lipid medication. To rule out the effect of both diabetes and lipid-  
9 lowering medications, sensitivity analyses were performed among those not taking lipid- or  
10 glucose-lowering medications. All analyses were performed using SAS software (version 9.4;  
11 SAS Institute Inc., Cary, North Carolina). Two-sided *p* values were provided, and *p*<0.05 was  
12 considered significant.

### 13 **Participant and Public Involvement**

14 Neither patients or public were directly involved in the development, design or  
15 recruitment of the study. Results will not be disseminated directly to study participants.

## 16 **Results**

17 Characteristics of the study participants are presented in **Table 1**. Participants were on  
18 average 40.2 years old at baseline. There were slightly more females (53.2%), and only 15.4%  
19 had less than a high school education. The majority (89.1%) of the participants were current  
20 drinkers, and 15.6% were current smokers. Participants were on average over weighted, with a  
21 mean BMI of 26.9 kg/m<sup>2</sup> and mean waist girth of 36.6 inches. About 6.9% of the participants

1 were treated for dyslipidemia, and 1.9% were treated for diabetes. The BMI independent leptin  
2 GRS1 was not associated with age ( $p=0.23$ ), sex ( $p=0.89$ ), education ( $p=0.22$ ), smoking  
3 ( $p=0.53$ ), drinking ( $p=0.32$ ), BMI ( $p=0.94$ ), waist circumference ( $p=0.70$ ), lipid-lowering  
4 medication usage ( $p=0.26$ ), or the physical activity index score ( $p=0.51$ ), but with diabetes-  
5 lowering medication usage ( $p=0.03$ ). As expected, the GRS1 was positively associated with age,  
6 sex, BMI, and waist circumference adjusted log-leptin ( $p=4.56\times 10^{-5}$ ).

### 7 **BMI independent leptin GRS1 and blood lipids**

8 After controlling for age, sex, BMI, and waist circumference, log-leptin was positively  
9 associated with TC ( $\beta=8.56$ ,  $p=6.35\times 10^{-18}$ ), LDL-C ( $\beta=6.46$ ,  $p=1.85\times 10^{-13}$ ), and log-TG ( $\beta=0.13$ ,  
10  $p=1.59\times 10^{-20}$ ), but was not associated with HDL-C ( $\beta=-0.62$ ,  $p=0.11$ ) (**Figure 1 and**  
11 **Supplemental Figure S1**). Per unit increase in the leptin GRS1 was associated with a 1.21-unit  
12 increase in the age, sex, BMI, and waist circumference adjusted log-leptin ( $p=4.56\times 10^{-5}$ ). The  
13 leptin GRS1 was inversely associated with age, sex, BMI, and waist circumference adjusted log-  
14 TG ( $\beta=-0.66$ ,  $p=0.01$ ) (**Figure 1**). When further adjusting for education, smoking, drinking, and  
15 physical activity, the GRS1 and log-TG association was still significant ( $\beta=-0.69$ ,  $p=0.008$ ,  
16 **Table 2**). Instrumental variable estimation indicated that log-TG levels decreased by 0.55 (95%  
17 CI: 0.05, 1.00,  $p=0.02$ ) per unit increase of genetically determined log-leptin level (**Figure 1**).  
18 The leptin GRS1 was inversely associated with TC ( $\beta=-12.50$ ,  $p=0.49$ ) and LDL-C ( $\beta=-0.11$ ,  
19  $p=0.99$ ) and positively associated with HDL-C ( $\beta=5.42$ ,  $p=0.44$ ), however, the correlations were  
20 not significant. The GRS1 and blood lipids associations were not modified by drinking status  
21 (**Table 2**).

### 22 **BMI dependent leptin GRS2 and blood lipids**

1 As expected, the BMI dependent leptin GRS2 was not associated with any covariate  
2 except for the BMI ( $p=0.02$ ) and waist circumference ( $p=0.03$ ). In the analyses controlling for  
3 age, sex, BMI, and waist circumference, the GRS2 was significantly associated with lower levels  
4 of log-TG ( $p=0.009$ ) and nominally associated with lower levels of HDL-C ( $p=0.09$ ) and TC  
5 ( $p=0.08$ ) (**Supplemental Figure S2**). When stratified by drinking status, the leptin GRS2 was  
6 negatively associated with LDL-C ( $\beta=-92.51$ ,  $p=0.03$ ), log-TG ( $\beta=-2.07$ ,  $p=0.004$ ), and TC ( $\beta=-$   
7  $144.68$ ,  $p=0.003$ ) only among non-current drinkers (**Table 3**). When further adjusting for  
8 education, smoking, drinking, and physical activity, those associations persisted (**Table 3**).  
9 Furthermore, significant interactions between leptin GRS2 and alcohol drinking were identified  
10 for LDL-C ( $p=0.03$ ), log-TG ( $p=0.03$ ), and TC ( $p=0.02$ ) (**Table 3**).

11 When restricting to participants not taking lipid-lowering medication and those not taking  
12 lipid- or glucose-lowering medications, respectively, the associations of GRS1 and GRS2 with  
13 blood lipids were similar to those as shown above (**Supplemental Table S3, S4, S5 and S6**).

## 14 Discussion

15 To the best of our knowledge, the current study is the first Mendelian randomization  
16 analysis on leptin and blood lipids. We provide robust evidence to support a potentially causal  
17 relation between leptin and reduced levels of triglycerides among a majority of overweight and  
18 obese population of European ancestry. Furthermore, we demonstrated that alcohol consumption  
19 modified the association of BMI dependent GRS2 with lipids in that genetically determined  
20 leptin levels were inversely associated with LDL-C, log-TG, and TC, but only among individuals  
21 who were not current drinkers.

1  
2  
3 1 Both the BMI dependent- and independent- GRSs were associated with lower level of  
4  
5 2 log-TG in the current study. Inconsistent associations between leptin and blood lipids have been  
6  
7 3 observed in previous studies. In a small study of 80 postmenopausal women, serum leptin was  
8  
9 4 positively associated with HDL-C, TG, and TC, and inversely associated with LDL-C.<sup>52</sup> Another  
10  
11 5 study conducted with 294 healthy school children reported that leptin was only associated with  
12  
13 6 increased TG.<sup>53</sup> However, a study of 476 residents from Cameroon reported a positive  
14  
15 7 correlation between leptin, LDL-C, and TC, and a positive association between leptin and TC,  
16  
17 8 but no association between leptin and HDL-C or TG.<sup>54</sup> In a more recent study of 134 physically  
18  
19 9 active postmenopausal women, no significant correlation was detected for leptin and blood  
20  
21 10 lipids.<sup>55</sup> The divergent results of previous studies make it impossible to infer a relationship  
22  
23 11 between leptin and blood lipids. Possible reasons for the divergent findings include varying  
24  
25 12 sample sizes, failure to account for residual and unmeasured confounding, and the genetic  
26  
27 13 background of the study population. Through Mendelian randomization analyses, we  
28  
29 14 demonstrated that genetically determined leptin was inversely associated with log-TG. It is well  
30  
31 15 known that alleles, such as risk alleles for leptin, are randomly assigned at meiosis and therefore,  
32  
33 16 are independent of non-genetic confounders. The association between leptin GRS and log-TG in  
34  
35 17 the current study was less prone to confounding. This also highlights the importance of using  
36  
37 18 Mendelian randomization to delineate causal relationships. Our finding is further supported by  
38  
39 19 previous physiologic studies, among which, leptin was demonstrated to inhibit lipogenesis,  
40  
41 20 stimulate lipolysis, and reduce triglyceride uptake.<sup>56</sup> However, the association of HDL-C and TC  
42  
43 21 were only nominally significant with BMI dependent GRS2 in the current study. It could be due  
44  
45 22 to lack of statistical power or existing interaction of leptin and drinking. Therefore, we cannot  
46  
47 23 rule out causal relationships between leptin and those lipid measures. Future large-scale  
48  
49  
50  
51  
52  
53  
54  
55  
56  
57  
58  
59  
60

1  
2  
3 1 Mendelian randomization studies are warranted to evaluate associations of leptin GRS with  
4  
5 2 HDL-C, LDL-C, and TC.  
6  
7

8  
9 3 The BMI independent GRS1 was only associated with log-TG, while the BMI dependent  
10  
11 4 GRS2 was also in nominal associations with HDL-C and TC. In addition, alcohol drinking  
12  
13 5 modified the GRS2-lipids associations but not the GRS1-lipids associations. This indicated that  
14  
15 6 the role of leptin in blood lipids regulation may be through multiple mechanisms. The BMI  
16  
17 7 dependent GRS2 were inversely associated with LDL-C, log-TG, and TC only among non-  
18  
19 8 current drinkers, but not among current drinkers. Although future studies are warranted to  
20  
21 9 confirm these interactions, previous physiological studies may provide a reasonable explanation.  
22  
23 10 Singh and colleagues demonstrated that the increased expression of caveolin-1 impairs leptin  
24  
25 11 signaling and attenuates leptin-dependent effect to prevent lipid accumulation in human white  
26  
27 12 pre-adipocytes.<sup>57</sup> Meanwhile, Caveolin-1 can be increased by alcohol drinking.<sup>58</sup>  
28  
29  
30  
31  
32

33 13 Our study represents the first Mendelian randomization analyses for leptin and blood  
34  
35 14 lipids in a population of European ancestry. A major strength of this study is the stringent quality  
36  
37 15 control methods used in measuring genotypes, phenotype, and covariates in the FHS 3<sup>rd</sup>  
38  
39 16 Generation Cohort. Those methods can reduce measurement error and increase the statistical  
40  
41 17 power needed to identify associations between leptin GRS and lipids. We also identify some  
42  
43 18 limitations. First, pleiotropy effects of SNPs included in the leptin GRS may confound the leptin  
44  
45 19 GRS and lipids associations. It is possible that our results may represent a shared genetic basis  
46  
47 20 between leptin and lipids rather than a causal relationship. Second, we may not have sufficient  
48  
49 21 power to detect associations between genetically determined leptin levels and LDL-C, HDL-C,  
50  
51 22 and TC. Larger Mendelian randomization studies are warranted to evaluate associations between  
52  
53  
54  
55  
56  
57  
58  
59  
60

1 leptin and LDL-C, HDL-C, and TC. Third, we did not control for total energy intake in our  
2 analyses because food frequency questionnaire survey was not conducted in the third generation  
3 cohort at baseline when leptin was measured. However, leptin combines with receptors in the  
4 hypothalamus to reduce appetite and increase energy expenditure. Therefore, total energy intake  
5 is in the pathway from leptin to lipids metabolism and may not meet the criteria of being a  
6 confounder. Forth, the type of alcohol consumed was not measured and cannot be considered in  
7 the current analyses. It is possible that the alcohol consumed in the studied population is mainly  
8 wine and/or beers, which contain high level of resveratrol and phytochemical. The two chemicals  
9 may benefit lipid metabolism.<sup>59 60</sup> However, the two chemicals do not share similar genetic  
10 profile with leptin, and consequently, they should not be correlated with leptin and cannot affect  
11 the associations between leptin GRS and blood lipids. Finally, our analyses were restricted to  
12 individuals of European ancestry. Our findings may not be generalizable to populations of other  
13 ancestries.

14 In summary, the present study provided robust evidence for a potential causal effect of  
15 leptin on reduced triglycerides. In addition, genetically determined leptin may regulate blood  
16 lipids through different mechanisms, and the association between leptin and lipid metabolism  
17 may be modified by alcohol consumption.

## 18 **Acknowledgements**

19 We acknowledge editorial assistance of Ms. Jessica Ho.

## 20 **Author Contributions**



1  
2  
3 1 Conceptualization, Changwei Li, José Cordero, Jia-Sheng Wang, Shengxu Li, and Zhi-  
4 Yong Zou; Formal analysis, Luqi Shen and Ye Shen; Supervision, Changwei Li, José Cordero,  
5  
6 2 Jia-Sheng Wang, Shengxu Li, and Zhi-Yong-Zou; Writing – original draft, Luqi Shen; Writing –  
7  
8 3 review & editing, Changwei Li, José Cordero, Luqi Shen, Lirong Liang, and Zhi-Yong Zou.  
9  
10  
11  
12

### 13 5 **Conflict of interest**

14  
15  
16  
17 6 Conflicts of interest and disclosures: none.  
18  
19

### 20 7 **Funding sources**

21  
22  
23  
24 8 This study was supported by National Natural Science Foundation of China (81773454)  
25  
26 9 and China Scholarship Council (201806015008).  
27  
28  
29

### 30 10 **Data sharing statement**

31  
32  
33 11 The deidentified dataset supporting this study is available on the database of genotype  
34  
35 12 and phenotype (dbGaP) at the National Center for Biotechnology Information (NCBI).  
36  
37  
38 13 [https://www.ncbi.nlm.nih.gov/projects/gap/cgi-bin/study.cgi?study\\_id=phs000007.v30.p11](https://www.ncbi.nlm.nih.gov/projects/gap/cgi-bin/study.cgi?study_id=phs000007.v30.p11). The  
39  
40 14 researchers are able to reuse the dataset on the condition that they get the approval from dbGaP  
41  
42 15 and their institution.  
43  
44  
45  
46  
47  
48  
49  
50  
51  
52  
53  
54  
55  
56  
57  
58  
59  
60

## References

1. Campfield LA, Smith FJ, Guisez Y, et al. Recombinant mouse OB protein: evidence for a peripheral signal linking adiposity and central neural networks. *Science* 1995;269(5223):546-9.
2. Halaas JL, Gajiwala KS, Maffei M, et al. Weight-reducing effects of the plasma protein encoded by the obese gene. *Science* 1995;269(5223):543-6.
3. Zhang Y, Proenca R, Maffei M, et al. Positional cloning of the mouse obese gene and its human homologue. *Nature* 1994;372(6505):425-32. doi: 10.1038/372425a0
4. Sainz N, Barrenetxe J, Moreno-Aliaga MJ, et al. Leptin resistance and diet-induced obesity: central and peripheral actions of leptin. *Metabolism: clinical and experimental* 2015;64(1):35-46. doi: 10.1016/j.metabol.2014.10.015
5. Wang MY, Lee Y, Unger RH. Novel form of lipolysis induced by leptin. *The Journal of biological chemistry* 1999;274(25):17541-4.
6. Harris RB. Direct and indirect effects of leptin on adipocyte metabolism. *Biochimica et biophysica acta* 2014;1842(3):414-23. doi: 10.1016/j.bbadis.2013.05.009
7. Enser M, Ashwell M. Fatty acid composition of triglycerides from adipose tissue transplanted between obese and lean mice. *Lipids* 1983;18(11):776-80.
8. Selenscig D, Rossi A, Chicco A, et al. Increased leptin storage with altered leptin secretion from adipocytes of rats with sucrose-induced dyslipidemia and insulin resistance: effect of dietary fish oil. *Metabolism: clinical and experimental* 2010;59(6):787-95. doi: 10.1016/j.metabol.2009.09.025
9. Kosztaczky B, Foris G, Paragh G, Jr., et al. Leptin stimulates endogenous cholesterol synthesis in human monocytes: New role of an old player in atherosclerotic plaque

- 1  
2  
3 1 formation. Leptin-induced increase in cholesterol synthesis. *The international journal of*  
4  
5 2 *biochemistry & cell biology* 2007;39(9):1637-45. doi: 10.1016/j.biocel.2007.04.012  
6  
7  
8 3 10. Francisco V, Pino J, Campos-Cabaleiro V, et al. Obesity, Fat Mass and Immune System:  
9  
10 4 Role for Leptin. *Front Physiol* 2018;9:640. doi: 10.3389/fphys.2018.00640 [published  
11  
12 5 Online First: 2018/06/01]  
13  
14  
15 6 11. La Cava A. Leptin in inflammation and autoimmunity. *Cytokine* 2017;98:51-58. doi:  
16  
17 7 10.1016/j.cyto.2016.10.011  
18  
19 8 12. Maurya R, Bhattacharya P, Dey R, et al. Leptin Functions in Infectious Diseases. *Front*  
20  
21 9 *Immunol* 2018;9:2741. doi: 10.3389/fimmu.2018.02741 [published Online First:  
22  
23 10 2018/11/26]  
24  
25  
26 11 13. D'souza AM, Neumann UH, Glavas MM, et al. The glucoregulatory actions of leptin. *Mol*  
27  
28 12 *Metab* 2017;6(9):1052-65. doi: 10.1016/j.molmet.2017.04.011 [published Online First:  
29  
30 13 2017/05/04]  
31  
32  
33 14 14. Sivitz WI, Walsh SA, Morgan DA, et al. Effects of leptin on insulin sensitivity in normal  
34  
35 15 rats. *Endocrinology* 1997;138(8):3395-401. doi: 10.1210/endo.138.8.5327  
36  
37  
38 16 15. Barr VA, Malide D, Zarnowski MJ, et al. Insulin stimulates both leptin secretion and  
39  
40 17 production by rat white adipose tissue. *Endocrinology* 1997;138(10):4463-72. doi:  
41  
42 18 10.1210/endo.138.10.5451  
43  
44  
45 19 16. Saladin R, De Vos P, Guerre-Millo M, et al. Transient increase in obese gene expression  
46  
47 20 after food intake or insulin administration. *Nature* 1995;377(6549):527-9. doi:  
48  
49 21 10.1038/377527a0  
50  
51  
52  
53  
54  
55  
56  
57  
58  
59  
60

- 1  
2  
3 1 17. Abella V, Scotece M, Conde J, et al. Leptin in the interplay of inflammation, metabolism and  
4  
5 2 immune system disorders. *Nat Rev Rheumatol* 2017;13(2):100-09. doi:  
6  
7 3 10.1038/nrrheum.2016.209 [published Online First: 2017/01/05]  
8  
9  
10 4 18. Saltiel AR, Kahn CR. Insulin signalling and the regulation of glucose and lipid metabolism.  
11  
12 5 *Nature* 2001;414(6865):799-806. doi: 10.1038/414799a  
13  
14  
15 6 19. Paz-Filho G, Mastronardi CA, Licinio J. Leptin treatment: facts and expectations.  
16  
17 7 *Metabolism: clinical and experimental* 2015;64(1):146-56. doi:  
18  
19 8 10.1016/j.metabol.2014.07.014  
20  
21  
22 9 20. Park JY, Javor ED, Cochran EK, et al. Long-term efficacy of leptin replacement in patients  
23  
24 10 with Dunnigan-type familial partial lipodystrophy. *Metabolism: clinical and*  
25  
26 11 *experimental* 2007;56(4):508-16. doi: 10.1016/j.metabol.2006.11.010  
27  
28  
29 12 21. Javor ED, Cochran EK, Musso C, et al. Long-term efficacy of leptin replacement in patients  
30  
31 13 with generalized lipodystrophy. *Diabetes* 2005;54(7):1994-2002.  
32  
33  
34 14 22. Ebihara K, Kusakabe T, Hirata M, et al. Efficacy and safety of leptin-replacement therapy  
35  
36 15 and possible mechanisms of leptin actions in patients with generalized lipodystrophy. *The*  
37  
38 16 *Journal of clinical endocrinology and metabolism* 2007;92(2):532-41. doi:  
39  
40 17 10.1210/jc.2006-1546  
41  
42  
43 18 23. Kamran F, Rother KI, Cochran E, et al. Consequences of stopping and restarting leptin in an  
44  
45 19 adolescent with lipodystrophy. *Hormone research in paediatrics* 2012;78(5-6):320-5.  
46  
47 20 doi: 10.1159/000341398  
48  
49  
50 21 24. Wu DM, Shen MH, Chu NF. Relationship between plasma leptin levels and lipid profiles  
51  
52 22 among school children in Taiwan--the Taipei Children Heart Study. *European journal of*  
53  
54 23 *epidemiology* 2001;17(10):911-6.  
55  
56  
57  
58  
59  
60

- 1  
2  
3 1 25. Sekhar RV, Jahoor F, Iyer D, et al. Leptin replacement therapy does not improve the  
4  
5 2 abnormal lipid kinetics of hypoleptinemic patients with HIV-associated lipodystrophy  
6  
7 3 syndrome. *Metabolism: clinical and experimental* 2012;61(10):1395-403. doi:  
8  
9 4 10.1016/j.metabol.2012.03.013  
10  
11  
12 5 26. Kilpelainen TO, Carli JF, Skowronski AA, et al. Genome-wide meta-analysis uncovers novel  
13  
14 6 loci influencing circulating leptin levels. *Nature communications* 2016;7:10494. doi:  
15  
16 7 10.1038/ncomms10494  
17  
18  
19 8 27. Rojdmarm S, Calissendorff J, Brismar K. Alcohol ingestion decreases both diurnal and  
20  
21 9 nocturnal secretion of leptin in healthy individuals. *Clinical endocrinology*  
22  
23 10 2001;55(5):639-47.  
24  
25  
26 11 28. Roth MJ, Baer DJ, Albert PS, et al. Relationship between serum leptin levels and alcohol  
27  
28 12 consumption in a controlled feeding and alcohol ingestion study. *Journal of the National*  
29  
30 13 *Cancer Institute* 2003;95(22):1722-5.  
31  
32  
33 14 29. Otaka M, Konishi N, Odashima M, et al. Effect of alcohol consumption on leptin level in  
34  
35 15 serum, adipose tissue, and gastric mucosa. *Digestive diseases and sciences*  
36  
37 16 2007;52(11):3066-9. doi: 10.1007/s10620-006-9635-x  
38  
39  
40 17 30. Pravdova E, Macho L, Fickova M. Alcohol intake modifies leptin, adiponectin and resistin  
41  
42 18 serum levels and their mRNA expressions in adipose tissue of rats. *Endocrine regulations*  
43  
44 19 2009;43(3):117-25.  
45  
46  
47 20 31. Slomiany BL, Slomiany A. Role of epidermal growth factor receptor transactivation in the  
48  
49 21 activation of cytosolic phospholipase A(2) in leptin protection of salivary gland acinar  
50  
51 22 cells against ethanol cytotoxicity. *Journal of physiology and pharmacology : an official*  
52  
53 23 *journal of the Polish Physiological Society* 2009;60(2):49-55.  
54  
55  
56  
57  
58  
59  
60

- 1  
2  
3 1 32. Yu HC, Li SY, Cao MF, et al. Effects of chronic ethanol consumption on levels of  
4  
5 2 adipokines in visceral adipose tissues and sera of rats. *Acta pharmacologica Sinica*  
6  
7 3 2010;31(4):461-9. doi: 10.1038/aps.2010.12  
8  
9  
10 4 33. Maddalozzo GF, Turner RT, Edwards CH, et al. Alcohol alters whole body composition,  
11  
12 5 inhibits bone formation, and increases bone marrow adiposity in rats. *Osteoporosis*  
13  
14 6 *international : a journal established as result of cooperation between the European*  
15  
16 7 *Foundation for Osteoporosis and the National Osteoporosis Foundation of the USA*  
17  
18 8 2009;20(9):1529-38. doi: 10.1007/s00198-009-0836-y  
19  
20  
21 9 34. Tan X, Sun X, Li Q, et al. Leptin deficiency contributes to the pathogenesis of alcoholic fatty  
22  
23 10 liver disease in mice. *The American journal of pathology* 2012;181(4):1279-86. doi:  
24  
25 11 10.1016/j.ajpath.2012.06.013  
26  
27  
28 12 35. Henriksen JH, Holst JJ, Moller S, et al. Increased circulating leptin in alcoholic cirrhosis:  
29  
30 13 relation to release and disposal. *Hepatology* 1999;29(6):1818-24. doi:  
31  
32 14 10.1002/hep.510290601  
33  
34  
35 15 36. Santolaria F, Perez-Cejas A, Aleman MR, et al. Low serum leptin levels and malnutrition in  
36  
37 16 chronic alcohol misusers hospitalized by somatic complications. *Alcohol and alcoholism*  
38  
39 17 2003;38(1):60-6.  
40  
41  
42 18 37. Nicolas JM, Fernandez-Sola J, Fatjo F, et al. Increased circulating leptin levels in chronic  
43  
44 19 alcoholism. *Alcoholism, clinical and experimental research* 2001;25(1):83-8.  
45  
46  
47 20 38. Beulens JW, de Zoete EC, Kok FJ, et al. Effect of moderate alcohol consumption on  
48  
49 21 adipokines and insulin sensitivity in lean and overweight men: a diet intervention study.  
50  
51 22 *European journal of clinical nutrition* 2008;62(9):1098-105. doi:  
52  
53 23 10.1038/sj.ejcn.1602821  
54  
55  
56  
57  
58  
59  
60

- 1  
2  
3 1 39. Voican CS, Njike-Nakseu M, Boujedidi H, et al. Alcohol withdrawal alleviates adipose tissue  
4  
5 2 inflammation in patients with alcoholic liver disease. *Liver international : official journal*  
6  
7 3 *of the International Association for the Study of the Liver* 2015;35(3):967-78. doi:  
8  
9 4 10.1111/liv.12575  
10  
11  
12 5 40. Greco AV, Mingrone G, Favuzzi A, et al. Serum leptin levels in post-hepatitis liver cirrhosis.  
13  
14 6 *Journal of hepatology* 2000;33(1):38-42.  
15  
16  
17 7 41. Wannamethee SG, Tchernova J, Whincup P, et al. Plasma leptin: associations with  
18  
19 8 metabolic, inflammatory and haemostatic risk factors for cardiovascular disease.  
20  
21 9 *Atherosclerosis* 2007;191(2):418-26. doi: 10.1016/j.atherosclerosis.2006.04.012  
22  
23  
24 10 42. Balasubramanian V, Nalini N. Intraperitoneal leptin regulates lipid metabolism in ethanol  
25  
26 11 supplemented Mus musculus heart. *Life sciences* 2006;78(8):831-7. doi:  
27  
28 12 10.1016/j.lfs.2005.05.079  
29  
30  
31 13 43. Splansky GL, Corey D, Yang Q, et al. The Third Generation Cohort of the National Heart,  
32  
33 14 Lung, and Blood Institute's Framingham Heart Study: design, recruitment, and initial  
34  
35 15 examination. *American journal of epidemiology* 2007;165(11):1328-35. doi:  
36  
37 16 10.1093/aje/kwm021  
38  
39  
40 17 44. 1000 Genome imputation based on the November 2010 release 1000 genome imputation  
41  
42 18 general procedure, 2010.  
43  
44  
45 19 45. Auton A, Brooks LD, Durbin RM, et al. A global reference for human genetic variation.  
46  
47 20 *Nature* 2015;526(7571):68-74. doi: 10.1038/nature15393  
48  
49 21 46. Das S, Forer L, Schönherr S, et al. Next-generation genotype imputation service and  
50  
51 22 methods. *Nat Genet* 2016;48(10):1284-7. doi: 10.1038/ng.3656 [published Online First:  
52  
53 23 2016/08/29]  
54  
55  
56  
57  
58  
59  
60

- 1  
2  
3 1 47. Andersson C, Lyass A, Larson MG, et al. Low-density-lipoprotein cholesterol concentrations  
4  
5 2 and risk of incident diabetes: epidemiological and genetic insights from the Framingham  
6  
7 3 Heart Study. *Diabetologia* 2015;58(12):2774-80. doi: 10.1007/s00125-015-3762-x  
8  
9  
10 4 48. Rao DC, Sung YJ, Winkler TW, et al. Multiancestry Study of Gene-Lifestyle Interactions for  
11  
12 5 Cardiovascular Traits in 610 475 Individuals From 124 Cohorts: Design and Rationale.  
13  
14 6 *Circ Cardiovasc Genet* 2017;10(3) doi: 10.1161/CIRCGENETICS.116.001649  
15  
16  
17 7 49. Friedewald WT, Levy RI, Fredrickson DS. Estimation of the concentration of low-density  
18  
19 8 lipoprotein cholesterol in plasma, without use of the preparative ultracentrifuge. *Clinical*  
20  
21 9 *chemistry* 1972;18(6):499-502.  
22  
23  
24 10 50. Kannel WB, Sorlie P. Some health benefits of physical activity. The Framingham Study.  
25  
26 11 *Archives of internal medicine* 1979;139(8):857-61.  
27  
28  
29 12 51. Palmer TM, Sterne JA, Harbord RM, et al. Instrumental variable estimation of causal risk  
30  
31 13 ratios and causal odds ratios in Mendelian randomization analyses. *Am J Epidemiol*  
32  
33 14 2011;173(12):1392-403. doi: 10.1093/aje/kwr026 [published Online First: 2011/05/09]  
34  
35  
36 15 52. Jaleel F, Jaleel A, Rahman MA, et al. Comparison of adiponectin, leptin and blood lipid  
37  
38 16 levels in normal and obese postmenopausal women. *J Pak Med Assoc* 2006;56(9):391-4.  
39  
40  
41 17 53. Kavazarakis E, Moustaki M, Gourgiotis D, et al. Relation of serum leptin levels to lipid  
42  
43 18 profile in healthy children. *Metabolism* 2001;50(9):1091-4. doi:  
44  
45 19 10.1053/meta.2001.25606  
46  
47 20 54. Ayina CN, Noubiap JJ, Etoundi Ngoa LS, et al. Association of serum leptin and adiponectin  
48  
49 21 with anthropomorphic indices of obesity, blood lipids and insulin resistance in a Sub-  
50  
51 22 Saharan African population. *Lipids in health and disease* 2016;15:96. doi:  
52  
53 23 10.1186/s12944-016-0264-x  
54  
55  
56  
57  
58  
59  
60



- 1  
2  
3 1 55. Jürimäe T, Jürimäe J, Leppik A, et al. Relationships between adiponectin, leptin, and blood  
4  
5 2 lipids in physically active postmenopausal females. *Am J Hum Biol* 2010;22(5):609-12.  
6  
7 3 doi: 10.1002/ajhb.21052  
8  
9  
10 4 56. Hynes GR, Jones PJ. Leptin and its role in lipid metabolism. *Curr Opin Lipidol*  
11  
12 5 2001;12(3):321-7.  
13  
14  
15 6 57. Singh P, Peterson TE, Sert-Kuniyoshi FH, et al. Leptin signaling in adipose tissue: role in  
16  
17 7 lipid accumulation and weight gain. *Circ Res* 2012;111(5):599-603. doi:  
18  
19 8 10.1161/CIRCRESAHA.112.273656 [published Online First: 2012/06/22]  
20  
21  
22 9 58. Gao L, Zhou Y, Zhong W, et al. Caveolin-1 is essential for protecting against binge drinking-  
23  
24 10 induced liver damage through inhibiting reactive nitrogen species. *Hepatology*  
25  
26 11 2014;60(2):687-99. doi: 10.1002/hep.27162 [published Online First: 2014/05/19]  
27  
28  
29 12 59. Haghghatdoost F, Hariri M. Effect of resveratrol on lipid profile: An updated systematic  
30  
31 13 review and meta-analysis on randomized clinical trials. *Pharmacol Res* 2018;129:141-50.  
32  
33 14 doi: 10.1016/j.phrs.2017.12.033 [published Online First: 2018/01/02]  
34  
35  
36 15 60. Leng E, Xiao Y, Mo Z, et al. Synergistic effect of phytochemicals on cholesterol metabolism  
37  
38 16 and lipid accumulation in HepG2 cells. *BMC Complement Altern Med* 2018;18(1):122.  
39  
40 17 doi: 10.1186/s12906-018-2189-6 [published Online First: 2018/04/05]  
41  
42  
43 18  
44  
45 19

1  
2  
3  
4  
5  
6  
7  
8  
9  
10  
11  
12  
13  
14  
15  
16  
17  
18  
19  
20  
21  
22  
23  
24  
25  
26  
27  
28  
29  
30  
31  
32  
33  
34  
35  
36  
37  
38  
39  
40  
41  
42  
43  
44  
45  
46  
47  
48  
49  
50  
51  
52  
53  
54  
55  
56  
57  
58  
59  
60

**Figure legends**

**Figure 1.** The relationship between leptin, genetic risk score for leptin and triglycerides (TG) in Framingham Heart Study the 3<sup>rd</sup> Generation cohort.

For peer review only

**Table 1. Characteristics of the Study Participants by Genetic Risk Score 1 (GRS1)<sup>a</sup> for logarithmically transformed Leptin in Framingham Heart Study 3<sup>rd</sup> Generation Cohort.**

| Covariates                                                   | Overall           | Quartiles of the leptin GRS |                   |                   |                   | P       |
|--------------------------------------------------------------|-------------------|-----------------------------|-------------------|-------------------|-------------------|---------|
|                                                              | (n=3,860)         | Q1 (n=964)                  | Q2 (n=961)        | Q3 (n=977)        | Q4 (n=958)        |         |
| Genetic risk score, mean (SD)                                | 0.07 (0.03)       | 0.03(0.02)                  | 0.06 (0.01)       | 0.08 (0.01)       | 0.11 (0.01)       |         |
| Age, years, mean (SD)                                        | 40.2 (8.9)        | 40.5 (8.7)                  | 39.9 (8.8)        | 40.3 (9.1)        | 39.9 (8.8)        | 0.23    |
| Male, N (%)                                                  | 1808 (46.8)       | 453 (47.0)                  | 437 (45.5)        | 460 (47.1)        | 458 (47.8)        | 0.89    |
| Education levels, N (%)                                      |                   |                             |                   |                   |                   |         |
| <i>No more than high school</i>                              | 591 (15.4)        | 141 (14.7)                  | 146 (15.3)        | 157 (16.1)        | 147 (15.4)        |         |
| <i>Some college</i>                                          | 1213 (31.5)       | 306 (31.8)                  | 287 (30.0)        | 313 (32.1)        | 307 (32.3)        | 0.22    |
| <i>Bachelor's degree and above</i>                           | 2041 (53.1)       | 514 (53.5)                  | 524 (54.8)        | 505 (51.8)        | 498 (52.3)        |         |
| Current Smoker, N (%)                                        | 603 (15.6)        | 144 (15.0)                  | 152 (15.8)        | 165 (16.9)        | 142 (14.8)        | 0.53    |
| Current Drinker, N (%)                                       | 3419 (89.1)       | 858 (89.4)                  | 853 (89.1)        | 863 (88.9)        | 845 (89.0)        | 0.32    |
| Physical Activities index score, mean(SD)                    | 37.5 (7.9)        | 37.8 (8.0)                  | 37.3 (8.1)        | 37.4 (7.7)        | 37.4 (7.8)        | 0.51    |
| BMI, kg/m <sup>2</sup> , mean (SD)                           | 26.9 (5.5)        | 26.9 (5.5)                  | 26.7 (5.5)        | 26.9 (5.5)        | 27.1 (5.5)        | 0.94    |
| Waist girth, inches, mean (SD)                               | 36.6 (6.0)        | 36.7 (6.0)                  | 36.3 (5.8)        | 36.7 (5.9)        | 36.8 (6.1)        | 0.70    |
| Treated for Lipids, N (%)                                    | 265 (6.9)         | 80 (8.3)                    | 56 (5.8)          | 66 (6.8)          | 63 (6.6)          | 0.26    |
| Treated for Diabetes, N (%)                                  | 72 (1.9)          | 22 (2.3)                    | 23 (2.4)          | 19 (1.9)          | 8 (0.8)           | 0.03    |
| Low Density Lipoprotein, mg/dL, mean (SD)                    | 111.7 (31.4)      | 112.1 (30.5)                | 111.5 (31.1)      | 111.9 (32.4)      | 111.3 (31.8)      | 0.94    |
| High Density Lipoprotein, mg/dL, mean (SD)                   | 54.3 (16.1)       | 54.1 (15.4)                 | 54.4 (15.9)       | 54.5 (16.2)       | 54.4 (16.7)       | 0.62    |
| Triglycerides, mg/dL, median (IQR)                           | 92.0 (65.0-138.0) | 92.0 (65.0-142.0)           | 96.0 (66.0-140.0) | 92.0 (65.0-137.0) | 90.0 (63.0-134.0) | 0.03*   |
| Total Cholesterol, mg/dL, mean (SD)                          | 188.8 (35.5)      | 189.1 (34.1)                | 188.9 (37.1)      | 189.5 (35.7)      | 187.9 (35.2)      | 0.64    |
| Leptin, ng/dL, median (IQR)                                  | 12.5 (3.5-15.1)   | 6.7 (3.4-14.5)              | 7.2 (3.4-14.8)    | 7.7 (3.7-14.9)    | 7.7 (3.6-16.8)    | 0.02*   |
| Log-leptin, mean (SD)                                        | 2.0 (1.1)         | 2.0 (1.0)                   | 2.0 (1.1)         | 2.0 (1.0)         | 2.1 (1.1)         | 0.02    |
| Age, sex, BMI and waist girth adjusted log-leptin, mean (SD) | 2.0 (1.1)         | 2.0 (1.0)                   | 2.0 (1.1)         | 2.0 (1.0)         | 2.1 (1.1)         | 0.00005 |

BMI=body mass index; Log-leptin=logarithmically transformed leptin; GRS=Genetic Risk Score; SD=standard deviation.

1  
2  
3<sup>a</sup> Genetic risk scores 1(GRS1) for leptin was generated by summing leptin increasing alleles of 3 SNPs adjusted for BMI, weighted by  
4 their corresponding effect sizes reported by Kilpelainen et al.

5  
6 \*Log transformed leptin and triglycerides were used to calculate the *P*-values.  
7  
8  
9  
10  
11  
12  
13  
14  
15  
16  
17  
18  
19  
20  
21  
22  
23  
24  
25  
26  
27  
28  
29  
30  
31  
32  
33  
34  
35  
36  
37  
38  
39  
40  
41  
42  
43  
44  
45  
46  
47

For peer review only

**Table 2. Association of BMI independent Leptin GRS1<sup>a</sup> with Baseline Lipids among Overall, Drinking, and Non-Drinking Participants of the Framingham Heart Study 3<sup>rd</sup> Generation Cohort, Respectively.**

|                          | Age, sex, BMI, waist adjusted model |      | $P_{\text{interaction}}^b$ | Fully adjusted model <sup>c</sup> |       | $P_{\text{interaction}}^d$ |
|--------------------------|-------------------------------------|------|----------------------------|-----------------------------------|-------|----------------------------|
|                          | Beta( SE)                           | $P$  |                            | Beta( SE)                         | $P$   |                            |
| <b>HDL-C</b>             |                                     |      |                            |                                   |       |                            |
| Overall                  | 5.42 (7.10)                         | 0.44 |                            | 7.79 (7.11)                       | 0.27  |                            |
| Not current drinkers     | 20.42 (18.29)                       | 0.26 | 0.74                       | 22.22 (18.76)                     | 0.24  | 0.71                       |
| Current drinkers         | 6.00 (7.61)                         | 0.43 |                            | 7.02 (7.64)                       | 0.36  |                            |
| <b>LDL-C</b>             |                                     |      |                            |                                   |       |                            |
| Overall                  | -0.11 (16.09)                       | 0.99 |                            | -1.09 (16.24)                     | 0.95  |                            |
| Not current drinkers     | 3.37 (48.63)                        | 0.94 | 0.79                       | -4.18 (50.10)                     | 0.93  | 0.93                       |
| Current drinkers         | -0.14 (17.10)                       | 0.99 |                            | -1.80 (17.18)                     | 0.92  |                            |
| <b>Log-TG</b>            |                                     |      |                            |                                   |       |                            |
| Overall                  | -0.66 (0.26)                        | 0.01 |                            | -0.69 (0.26)                      | 0.008 |                            |
| Not current drinkers     | -1.41 (0.80)                        | 0.08 | 0.31                       | -1.32 (0.82)                      | 0.11  | 0.32                       |
| Current drinkers         | -0.58 (0.27)                        | 0.04 |                            | -0.61 (0.27)                      | 0.03  |                            |
| <b>Total cholesterol</b> |                                     |      |                            |                                   |       |                            |
| Overall                  | -12.50 (18.21)                      | 0.49 |                            | -12.58 (18.31)                    | 0.49  |                            |
| Not current drinkers     | -15.20 (54.11)                      | 0.78 | 0.96                       | -19.13 (55.66)                    | 0.73  | 0.86                       |
| Current drinkers         | -10.20 (19.37)                      | 0.60 |                            | -11.43 (19.42)                    | 0.56  |                            |

GRS=Genetic Risk Score; HDL-C =High-density lipoprotein cholesterol; LDL-C =Low-density lipoprotein cholesterol; log-TG=logarithmically transformed triglycerides; SE=standard error.

<sup>a</sup> Genetic risk scores1 (GRS1) for leptin was generated by summing leptin increasing alleles of 3 SNPs adjusted for body mass index (BMI), weighted by their corresponding effect sizes reported by Kilpelainen et al;

<sup>b</sup> Assessed by adding an interaction term, drinking×GRS along with the drinking variable to the age, sex, BMI and waist adjusted model among the overall participants;

<sup>c</sup> Adjusted for age, sex, education, smoking, drinking, BMI, waist, and physical activity among the overall sample;

<sup>d</sup> Assessed by adding an interaction term, drinking×GRS to the fully adjusted model among the overall participants.

**Table 3. Association of BMI dependent Leptin GRS<sup>2a</sup> with Baseline Lipids among Overall, Drinking, and Non-Drinking Participants of the Framingham Heart Study 3<sup>rd</sup> Generation Cohort, Respectively.**

|                      | Age, sex, BMI, waist adjusted model |       | $P_{\text{interaction}}^b$ | Fully adjusted model <sup>c</sup> |       | $P_{\text{interaction}}^d$ |
|----------------------|-------------------------------------|-------|----------------------------|-----------------------------------|-------|----------------------------|
|                      | Beta( SE)                           | $P$   |                            | Beta( SE)                         | $P$   |                            |
| HDL-C                |                                     |       |                            |                                   |       |                            |
| Overall              | -10.67 (6.20)                       | 0.09  |                            | -10.98 (6.22)                     | 0.08  |                            |
| Not current drinkers | -0.69 (16.31)                       | 0.97  | 0.56                       | 0.82 (16.55)                      | 0.96  | 0.52                       |
| Current drinkers     | -12.15 (6.64)                       | 0.07  |                            | -11.94 (6.68)                     | 0.07  |                            |
| LDL-C                |                                     |       |                            |                                   |       |                            |
| Overall              | -2.11 (14.05)                       | 0.88  |                            | -2.81 (14.21)                     | 0.84  |                            |
| Not current drinkers | -92.51 (43.02)                      | 0.03  | 0.03                       | -101.15 (43.78)                   | 0.02  | 0.02                       |
| Current drinkers     | 9.21 (14.91)                        | 0.54  |                            | 7.89 (15.02)                      | 0.60  |                            |
| log-TG               |                                     |       |                            |                                   |       |                            |
| Overall              | -0.59 (0.23)                        | 0.009 |                            | -0.59 (0.23)                      | 0.01  |                            |
| Not current drinkers | -2.07 (0.71)                        | 0.004 | 0.03                       | -2.03 (0.72)                      | 0.005 | 0.03                       |
| Current drinkers     | -0.40 (0.24)                        | 0.09  |                            | -0.42 (0.24)                      | 0.08  |                            |
| Total cholesterol    |                                     |       |                            |                                   |       |                            |
| Overall              | -28.05 (15.91)                      | 0.08  |                            | -28.74 (16.02)                    | 0.07  |                            |
| Not current drinkers | -144.68 (47.61)                     | 0.003 | 0.02                       | -151.32 (48.37)                   | 0.002 | 0.01                       |
| Current drinkers     | -13.19 (16.90)                      | 0.44  |                            | -14.67 (16.98)                    | 0.39  |                            |

GRS=Genetic Risk Score; HDL-C =High-density lipoprotein cholesterol; LDL-C =Low-density lipoprotein cholesterol; log-TG=logarithmically transformed triglycerides; SE=standard error.

<sup>a</sup> Genetic risk scores<sup>2</sup> (GRS<sup>2</sup>) for leptin was generated by summing leptin increasing alleles of 3 SNPs unadjusted for body mass index (BMI), weighted by their corresponding effect sizes reported by Kilpelainen et al;

<sup>b</sup> Assessed by adding an interaction term, drinking×GRS along with the drinking variable to the age, sex, BMI and waist adjusted model among the overall participants;

<sup>c</sup> Adjusted for age, sex, education, smoking, drinking, BMI, waist, and physical activity among the overall sample;

<sup>d</sup> Assessed by adding an interaction term, drinking×GRS to the fully adjusted model among the overall participants.

1  
2  
3  
4  
5  
6  
7  
8  
9  
10  
11  
12  
13  
14  
15  
16  
17  
18  
19  
20  
21  
22  
23  
24  
25  
26  
27  
28  
29  
30  
31  
32  
33  
34  
35  
36  
37  
38  
39  
40  
41  
42  
43  
44  
45  
46  
47  
48  
49  
50  
51  
52  
53  
54  
55  
56  
57  
58  
59  
60

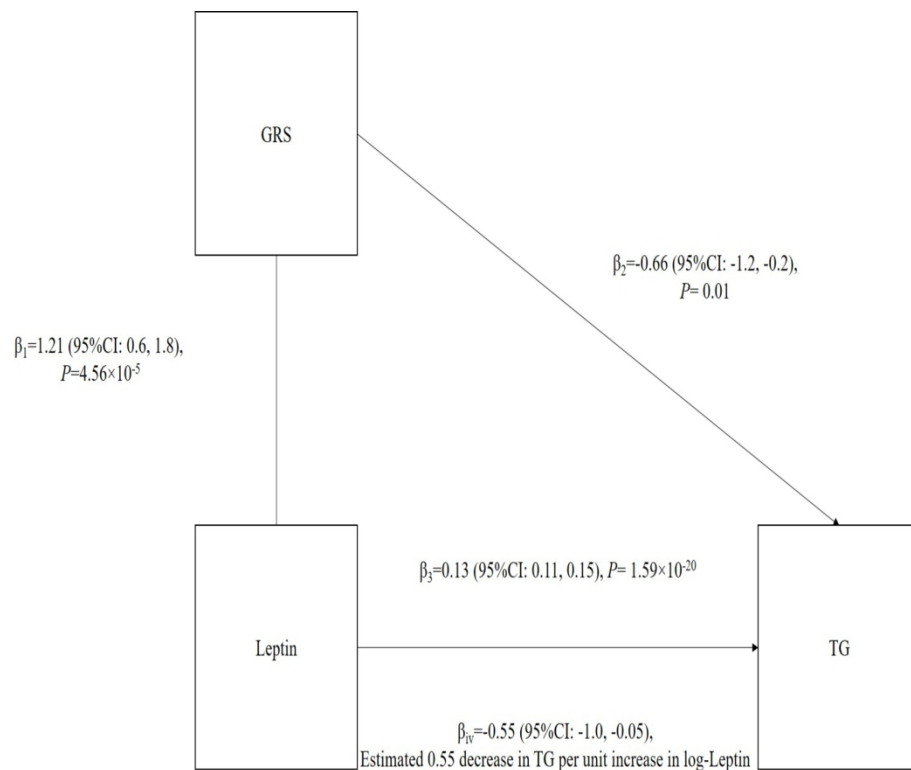

155x127mm (300 x 300 DPI)

1  
2  
3  
4  
5  
6  
7  
8  
9  
10  
11  
12  
13  
14  
15  
16  
17  
18  
19  
20  
21  
22  
23  
24  
25  
26  
27  
28  
29  
30  
31  
32  
33  
34  
35  
36  
37  
38  
39  
40  
41  
42  
43  
44  
45  
46  
47

**Supplemental Table S1. Basic Information of three SNPs for BMI independent leptin GRS1<sup>a</sup> reaching genome-wide significance ( $P < 5 \times 10^{-8}$ )**

| Chromosome  |            | Coded  | Non-coded | Nearest        |                |         |                   |
|-------------|------------|--------|-----------|----------------|----------------|---------|-------------------|
| Position    | rsID       | Allele | Allele    | R <sup>2</sup> | Function       | Gene    | Population        |
| 2:27742603  | rs780093   | C      | T         | 0.995          | intron variant | GCKR    | European American |
| 7:127860163 | rs10487505 | G      | C         | 0.989          | intron variant | LEP     | European American |
| 20:37333012 | rs6071166  | C      | A         | 0.973          | intergenic     | SLC32A1 | European American |

BMI=body mass index

<sup>a</sup> Genetic risk scores 1 (GRS1) for leptin was generated by summing leptin increasing alleles of 3 SNPs adjusted for body mass index (BMI), weighted by their corresponding effect sizes reported by Kilpelainen et al.



**Supplemental Table S2. Basic Information of three SNPs for BMI dependent leptin GRS2<sup>a</sup> reaching genome-wide significance (P<5×10<sup>-8</sup>)**

| <b>Chromosome</b> |             | <b>Coded</b>  | <b>Non-coded</b> |                      |                      | <b>Nearest</b> |                   |
|-------------------|-------------|---------------|------------------|----------------------|----------------------|----------------|-------------------|
| <b>Position</b>   | <b>rsID</b> | <b>Allele</b> | <b>Allele</b>    | <b>R<sup>2</sup></b> | <b>Function</b>      | <b>Gene</b>    | <b>Population</b> |
| 2:27742603        | rs780093    | C             | T                | 0.995                | intron variant       | GCKR           | European American |
| 3:156798775       | rs900400    | T             | C                | 0.691                | upstream variant 2KB | CCNL1          | European American |
| 16:53813450       | rs8043757   | A             | T                | 0.999                | intron variant       | FTO            | European American |

BMI=body mass index

<sup>a</sup> Genetic risk scores 2 (GRS2) for leptin was generated by summing leptin increasing alleles of 3 SNPs unadjusted for body mass index (BMI), weighted by their corresponding effect sizes reported by Kilpelainen et al.

**Supplemental Table S3. Association of BMI independent Leptin GRS1<sup>a</sup> with Baseline Lipids among Overall, Drinking, and Non-Drinking Participants without treating for Lipids of the Framingham Heart Study 3<sup>rd</sup> Generation Cohort, Respectively.**

|                      | Age, sex, BMI, waist adjusted model |          | <i>P</i> <sub>interaction<sup>b</sup></sub> | Fully adjusted model <sup>c</sup> |          | <i>P</i> <sub>interaction<sup>d</sup></sub> |
|----------------------|-------------------------------------|----------|---------------------------------------------|-----------------------------------|----------|---------------------------------------------|
|                      | Beta( SE)                           | <i>P</i> |                                             | Beta( SE)                         | <i>P</i> |                                             |
| <b>HDL-C</b>         |                                     |          |                                             |                                   |          |                                             |
| Overall              | 5.25 (7.44)                         | 0.48     |                                             | 7.59 (7.47)                       | 0.31     |                                             |
| Not current drinkers | 18.83 (19.59)                       | 0.34     | 0.86                                        | 20.43 (20.23)                     | 0.31     | 0.83                                        |
| Current drinkers     | 6.22 (7.97)                         | 0.44     |                                             | 7.19 (8)                          | 0.37     |                                             |
| <b>LDL-C</b>         |                                     |          |                                             |                                   |          |                                             |
| Overall              | 14.86 (16.06)                       | 0.35     |                                             | 13.43 (16.2)                      | 0.41     |                                             |
| Not current drinkers | 36.1 (49.22)                        | 0.46     | 0.51                                        | 27.18 (50.69)                     | 0.59     | 0.61                                        |
| Current drinkers     | 12.19 (17.05)                       | 0.47     |                                             | 10.48 (17.11)                     | 0.54     |                                             |
| <b>log-TG</b>        |                                     |          |                                             |                                   |          |                                             |
| Overall              | -0.69 (0.27)                        | 0.01     |                                             | -0.72 (0.27)                      | 0.007    |                                             |
| Not current drinkers | -1.72 (0.84)                        | 0.04     | 0.20                                        | -1.61 (0.86)                      | 0.06     | 0.21                                        |
| Current drinkers     | -0.58 (0.28)                        | 0.04     |                                             | -0.6 (0.28)                       | 0.03     |                                             |

## Total cholesterol

|                      |               |      |      |               |      |      |
|----------------------|---------------|------|------|---------------|------|------|
| Overall              | -0.09 (18.19) | 1.00 |      | -0.67 (18.26) | 0.97 |      |
| Not current drinkers | 3.78 (55.05)  | 0.95 | 0.94 | -2.29 (56.42) | 0.97 | 0.97 |
| Current drinkers     | 0.98 (19.29)  | 0.96 |      | -0.34 (19.32) | 0.99 |      |

BMI=body mass index; GRS=Genetic Risk Score; HDL-C=High-density lipoprotein cholesterol; LDL-C=Low-density lipoprotein cholesterol; log-TG=logarithmically transformed triglycerides; SE=standard error

<sup>a</sup> Genetic risk scores 1 (GRS1) for leptin was generated by summing leptin increasing alleles of 3 SNPs adjusted for body mass index (BMI), weighted by their corresponding effect sizes reported by Kilpelainen et al;

<sup>b</sup> Assessed by adding an interaction term, drinking×GRS along with the drinking variable to the age, sex, BMI and waist adjusted model among the overall participants;

<sup>c</sup> Adjusted for age, sex, education, smoking, drinking, BMI, waist, and physical activity among the overall sample;

<sup>d</sup> Assessed by adding an interaction term, drinking×GRS to the fully adjusted model among the overall participants.

**Supplemental Table S4. Association of BMI dependent Leptin GRS2<sup>a</sup> with Baseline Lipids among Overall, Drinking, and Non-Drinking Participants without treating for Lipids of the Framingham Heart Study 3<sup>rd</sup> Generation Cohort, Respectively.**

|                          | Age, sex, BMI, waist adjusted model |          |                                              | Fully adjusted model <sup>c</sup> |          |                                              |
|--------------------------|-------------------------------------|----------|----------------------------------------------|-----------------------------------|----------|----------------------------------------------|
|                          | Beta( SE)                           | <i>P</i> | <i>P</i> <sub>interaction</sub> <sup>b</sup> | Beta( SE)                         | <i>P</i> | <i>P</i> <sub>interaction</sub> <sup>d</sup> |
| <b>HDL-C</b>             |                                     |          |                                              |                                   |          |                                              |
| Overall                  | -9.73 (6.50)                        | 0.13     |                                              | -9.66 (6.53)                      | 0.14     |                                              |
| Not current drinkers     | -2.61 (17.44)                       | 0.88     | 0.72                                         | -1.22 (17.77)                     | 0.95     | 0.68                                         |
| Current drinkers         | -10.52 (6.94)                       | 0.13     |                                              | -10.19 (6.99)                     | 0.15     |                                              |
| <b>LDL-C</b>             |                                     |          |                                              |                                   |          |                                              |
| Overall                  | -0.42 (14.02)                       | 0.98     |                                              | -1.56 (14.17)                     | 0.91     |                                              |
| Not current drinkers     | -83.19 (43.58)                      | 0.06     | 0.07                                         | -94.12 (44.22)                    | 0.03     | 0.05                                         |
| Current drinkers         | 9.71 (14.86)                        | 0.51     |                                              | 7.61 (14.96)                      | 0.61     |                                              |
| <b>log-TG</b>            |                                     |          |                                              |                                   |          |                                              |
| Overall                  | -0.63 (0.23)                        | 0.007    |                                              | -0.63 (0.23)                      | 0.007    |                                              |
| Not current drinkers     | -2.09 (0.74)                        | 0.005    | 0.04                                         | -2.00 (0.75)                      | 0.008    | 0.05                                         |
| Current drinkers         | -0.45 (0.25)                        | 0.07     |                                              | -0.47 (0.25)                      | 0.05     |                                              |
| <b>Total cholesterol</b> |                                     |          |                                              |                                   |          |                                              |

|                      |                 |       |      |                 |       |      |
|----------------------|-----------------|-------|------|-----------------|-------|------|
| Overall              | -25.28 (15.87)  | 0.11  |      | -26.38 (15.97)  | 0.10  |      |
| Not current drinkers | -136.15 (48.44) | 0.005 | 0.03 | -144.29 (48.92) | 0.003 | 0.02 |
| Current drinkers     | -10.96 (16.82)  | 0.51  |      | -13.64 (16.90)  | 0.42  |      |

BMI=body mass index; GRS=Genetic Risk Score; HDL-C=High-density lipoprotein cholesterol; LDL-C=Low-density lipoprotein cholesterol; log-TG=logarithmically transformed triglycerides; SE=standard error

<sup>a</sup> Genetic risk scores 2 (GRS2) for leptin was generated by summing leptin increasing alleles of 3 SNPs unadjusted for body mass index (BMI), weighted by their corresponding effect sizes reported by Kilpelainen et al;

<sup>b</sup> Assessed by adding an interaction term, drinking×GRS along with the drinking variable to the age, sex, BMI and waist adjusted model among the overall participants;

<sup>c</sup> Adjusted for age, sex, education, smoking, drinking, BMI, waist, and physical activity among the overall sample;

<sup>d</sup> Assessed by adding an interaction term, drinking×GRS to the fully adjusted model among the overall participants.

**Supplemental Table S5. Association of BMI independent Leptin GRS1<sup>a</sup> with Baseline Lipids among Overall, Drinking, and Non-Drinking Participants without treating for Lipids and Diabetes of the Framingham Heart Study 3<sup>rd</sup> Generation Cohort, Respectively.**

|                      | Age, sex, BMI, waist adjusted model |          |                                              | Fully adjusted model <sup>c</sup> |          |                                              |
|----------------------|-------------------------------------|----------|----------------------------------------------|-----------------------------------|----------|----------------------------------------------|
|                      | Beta( SE)                           | <i>P</i> | <i>P</i> <sub>interaction</sub> <sup>b</sup> | Beta( SE)                         | <i>P</i> | <i>P</i> <sub>interaction</sub> <sup>d</sup> |
| <b>HDL-C</b>         |                                     |          |                                              |                                   |          |                                              |
| Overall              | 5.64 (7.47)                         | 0.45     |                                              | 8.00 (7.49)                       | 0.29     |                                              |
| Not current drinkers | 20.89 (19.62)                       | 0.29     | 0.72                                         | 22.51 (20.25)                     | 0.27     | 0.69                                         |
| Current drinkers     | 6.22 (7.98)                         | 0.44     |                                              | 7.17 (8.02)                       | 0.37     |                                              |
| <b>LDL-C</b>         |                                     |          |                                              |                                   |          |                                              |
| Overall              | 15.29 (16.11)                       | 0.34     |                                              | 13.42 (16.27)                     | 0.41     |                                              |
| Not current drinkers | 33.51 (49.77)                       | 0.50     | 0.58                                         | 24.63 (51.26)                     | 0.63     | 0.68                                         |
| Current drinkers     | 12.68 (17.09)                       | 0.46     |                                              | 10.99 (17.16)                     | 0.52     |                                              |
| <b>log-TG</b>        |                                     |          |                                              |                                   |          |                                              |
| Overall              | -0.66 (0.27)                        | 0.01     |                                              | -0.69 (0.27)                      | 0.01     |                                              |
| Not current drinkers | -1.60 (0.85)                        | 0.06     | 0.23                                         | -1.46 (0.86)                      | 0.09     | 0.25                                         |
| Current drinkers     | -0.57 (0.28)                        | 0.04     |                                              | -0.59 (0.28)                      | 0.04     |                                              |

## Total cholesterol

|                      |              |      |      |              |      |      |
|----------------------|--------------|------|------|--------------|------|------|
| Overall              | 1.17 (18.24) | 0.95 |      | 0.14 (18.33) | 0.99 |      |
| Not current drinkers | 6.19 (55.64) | 0.91 | 0.93 | 1.04 (57.03) | 0.99 | 0.99 |
| Current drinkers     | 1.56 (19.35) | 0.94 |      | 0.26 (19.38) | 0.99 |      |

BMI=body mass index; GRS=Genetic Risk Score; HDL-C =High-density lipoprotein cholesterol; LDL-C =Low-density lipoprotein cholesterol; log-TG=logarithmically transformed triglycerides; SE=standard error

<sup>a</sup> Genetic risk scores 1 (GRS1) for leptin was generated by summing leptin increasing alleles of 3 SNPs adjusted for body mass index (BMI), weighted by their corresponding effect sizes reported by Kilpelainen et al;

<sup>b</sup> Assessed by adding an interaction term, drinking×GRS along with the drinking variable to the age, sex, BMI and waist adjusted model among the overall participants;

<sup>c</sup> Adjusted for age, sex, education, smoking, drinking, BMI, waist, and physical activity among the overall sample;

<sup>d</sup> Assessed by adding an interaction term, drinking×GRS to the fully adjusted model among the overall participants.

**Supplemental Table S6. Association of BMI dependent Leptin GRS2<sup>a</sup> with Baseline Lipids among Overall, Drinking, and Non-Drinking Participants without treating for Lipids and Diabetes of the Framingham Heart Study 3<sup>rd</sup> Generation Cohort, respectively.**

|                      | Age, sex, BMI, waist adjusted model |          | <i>P</i> <sub>interaction<sup>b</sup></sub> | Fully adjusted model <sup>c</sup> |          | <i>P</i> <sub>interaction<sup>d</sup></sub> |
|----------------------|-------------------------------------|----------|---------------------------------------------|-----------------------------------|----------|---------------------------------------------|
|                      | Beta( SE)                           | <i>P</i> |                                             | Beta( SE)                         | <i>P</i> |                                             |
| <b>HDL-C</b>         |                                     |          |                                             |                                   |          |                                             |
| Overall              | -10.39 (6.52)                       | 0.11     |                                             | -10.48 (6.55)                     | 0.11     |                                             |
| Not current drinkers | -8.18 (17.54)                       | 0.64     | 0.95                                        | -7.77 (17.87)                     | 0.66     | 0.92                                        |
| Current drinkers     | -10.58 (6.96)                       | 0.13     |                                             | -10.32 (7.01)                     | 0.14     |                                             |
| <b>LDL-C</b>         |                                     |          |                                             |                                   |          |                                             |
| Overall              | -1.58 (14.07)                       | 0.91     |                                             | -3.3 (14.22)                      | 0.82     |                                             |
| Not current drinkers | -95.04 (44.19)                      | 0.03     | 0.04                                        | -105.66 (44.81)                   | 0.02     | 0.03                                        |
| Current drinkers     | 8.84 (14.90)                        | 0.55     |                                             | 6.84 (15.00)                      | 0.65     |                                             |
| <b>log-TG</b>        |                                     |          |                                             |                                   |          |                                             |
| Overall              | -0.62 (0.23)                        | 0.008    |                                             | -0.62 (0.23)                      | 0.008    |                                             |
| Not current drinkers | -2.00 (0.75)                        | 0.008    | 0.06                                        | -1.87 (0.76)                      | 0.01     | 0.08                                        |



|    |                      |                 |       |      |                 |       |      |
|----|----------------------|-----------------|-------|------|-----------------|-------|------|
| 1  |                      |                 |       |      |                 |       |      |
| 2  |                      |                 |       |      |                 |       |      |
| 3  | Current drinkers     | -0.45 (0.25)    | 0.07  |      | -0.48 (0.25)    | 0.05  |      |
| 4  |                      |                 |       |      |                 |       |      |
| 5  | Total cholesterol    |                 |       |      |                 |       |      |
| 6  |                      |                 |       |      |                 |       |      |
| 7  | Overall              | -26.72 (15.92)  | 0.09  |      | -28.67 (16.03)  | 0.07  |      |
| 8  |                      |                 |       |      |                 |       |      |
| 9  | Not current drinkers | -150.52 (49.04) | 0.002 | 0.01 | -158.43 (49.51) | 0.002 | 0.01 |
| 10 |                      |                 |       |      |                 |       |      |
| 11 | Current drinkers     | -12.06 (16.87)  | 0.47  |      | -14.69 (16.95)  | 0.39  |      |
| 12 |                      |                 |       |      |                 |       |      |
| 13 |                      |                 |       |      |                 |       |      |
| 14 |                      |                 |       |      |                 |       |      |

BMI=body mass index; GRS=Genetic Risk Score; HDL-C=High-density lipoprotein cholesterol; LDL-C=Low-density lipoprotein cholesterol; log-TG=logarithmically transformed triglycerides; SE=standard error

<sup>a</sup> Genetic risk scores 2 (GRS2) for leptin was generated by summing leptin increasing alleles of 3 SNPs unadjusted for body mass index (BMI), weighted by their corresponding effect sizes reported by Kilpelainen et al;

<sup>b</sup> Assessed by adding an interaction term, drinking×GRS along with the drinking variable to the age, sex, BMI and waist adjusted model among the overall participants;

<sup>c</sup> Adjusted for age, sex, education, smoking, drinking, BMI, waist, and physical activity among the overall sample;

<sup>d</sup> Assessed by adding an interaction term, drinking×GRS to the fully adjusted model among the overall participants.

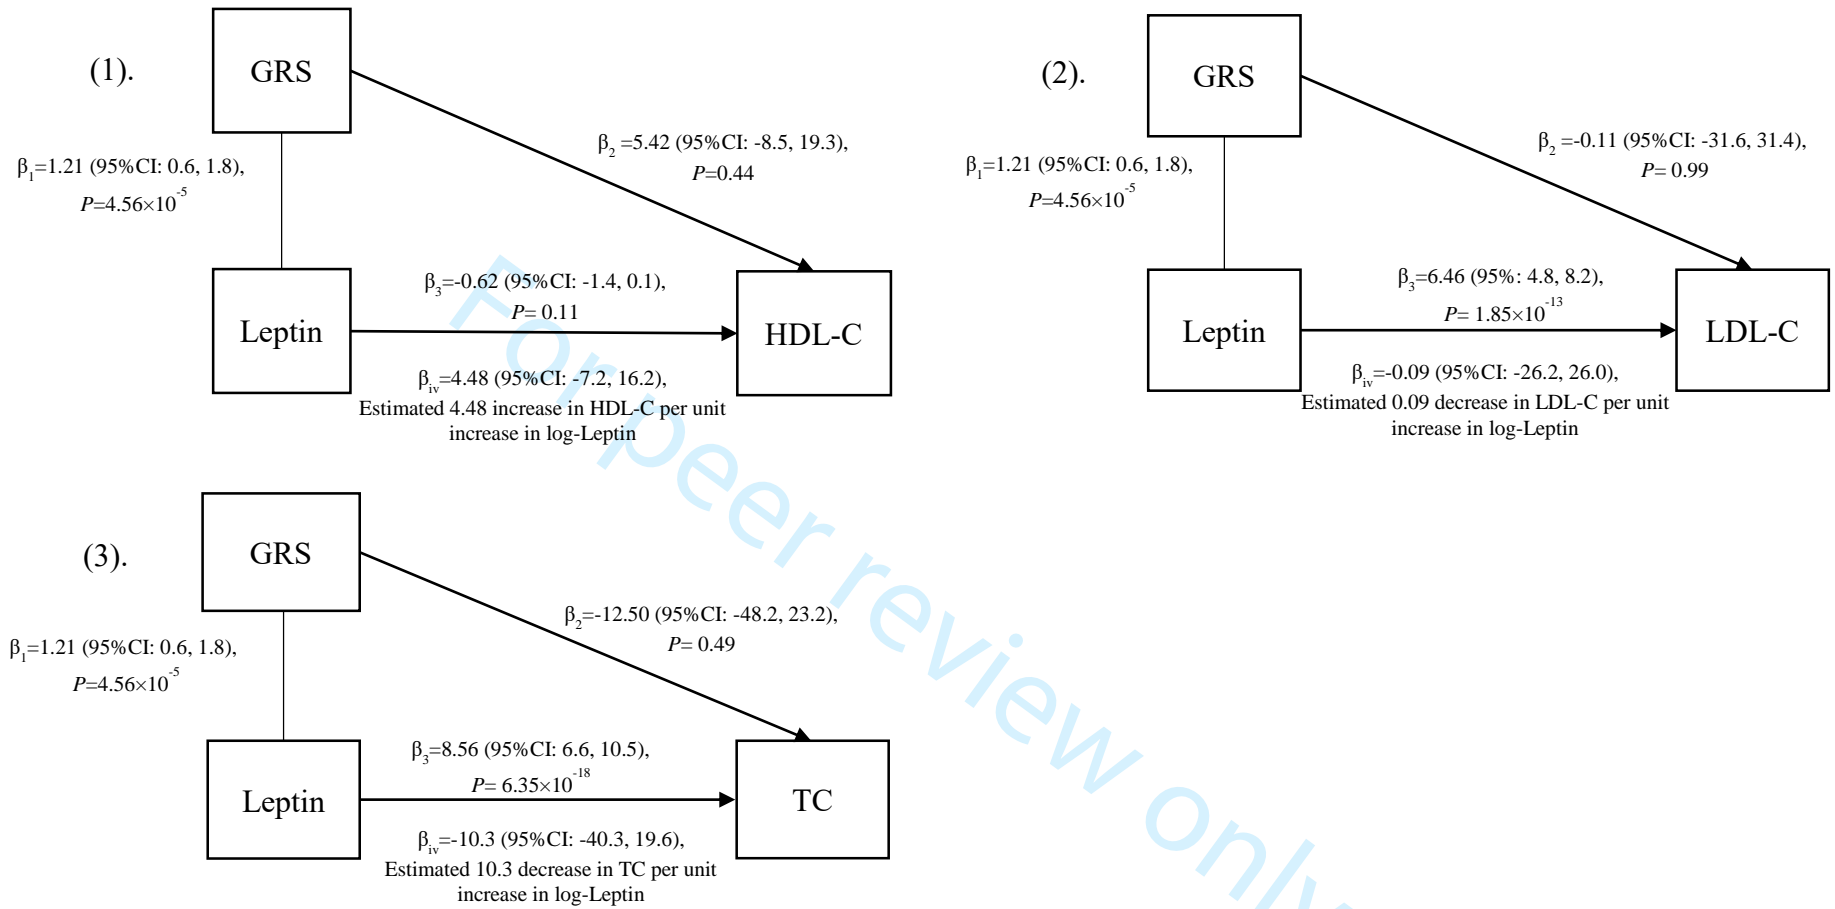

**Supplemental Figure S1. The relationship between Leptin, Genetic Risk Score 1 (GRS1) for Leptin and Lipids in Framingham Heart Study the 3<sup>rd</sup> Generation cohort.**

1. The relationship between leptin, genetic risk score for leptin and high density lipoprotein cholesterol (HDL-C)
2. The relationship between leptin, genetic risk score for leptin and low density lipoprotein cholesterol (LDL-C)
3. The relationship between leptin, genetic risk score for leptin and total cholesterol (TC)

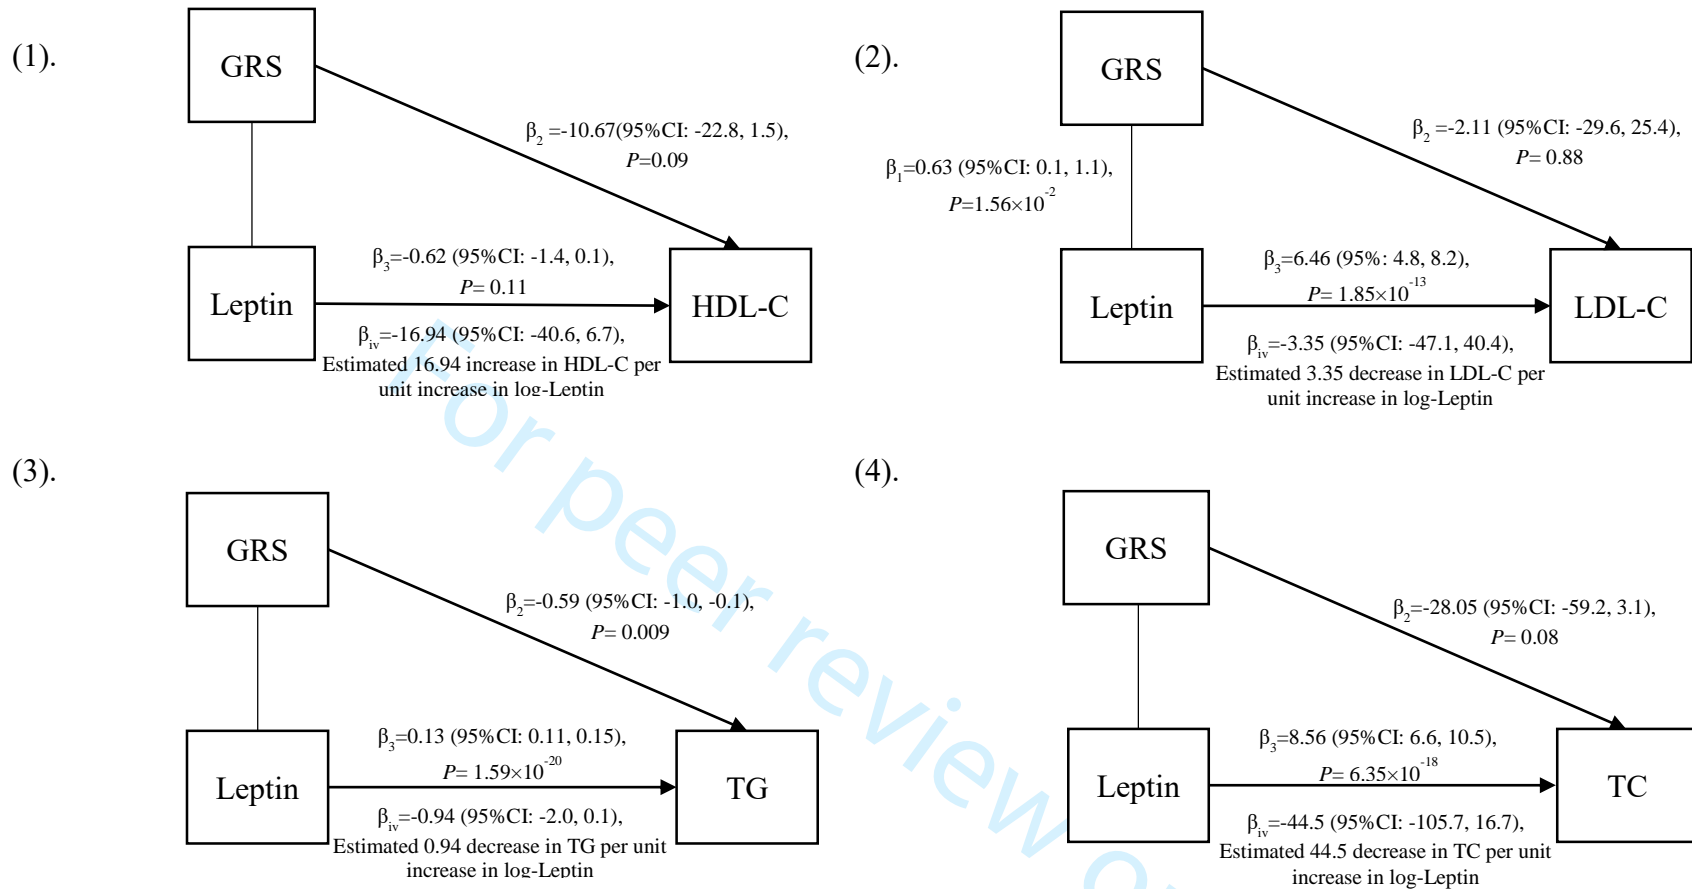

**Supplemental Figure S2. The relationship between Leptin, Genetic Risk Score 2 (GRS2) for Leptin and Lipids in Framingham Heart Study the 3<sup>rd</sup> Generation cohort.**

1. The relationship between leptin, genetic risk score for leptin and high density lipoprotein cholesterol (HDL-C)
2. The relationship between leptin, genetic risk score for leptin and low density lipoprotein cholesterol (LDL-C)
3. The relationship between leptin, genetic risk score for leptin and triglycerides (TG)

1  
2  
3  
4  
5  
6  
7  
8  
9  
10  
11  
12  
13  
14  
15  
16  
17  
18  
19  
20  
21  
22  
23  
24  
25  
26  
27  
28  
29  
30  
31  
32  
33  
34  
35  
36  
37  
38  
39  
40  
41  
42  
43  
44  
45  
46  
47

4. The relationship between leptin, genetic risk score for leptin and total cholesterol (TC)

For peer review only

# Reporting checklist for genetic association study.

Based on the STREGA guidelines.

## Instructions to authors

Complete this checklist by entering the page numbers from your manuscript where readers will find each of the items listed below.

Your article may not currently address all the items on the checklist. Please modify your text to include the missing information. If you are certain that an item does not apply, please write "n/a" and provide a short explanation.

Upload your completed checklist as an extra file when you submit to a journal.

In your methods section, say that you used the STREGA reporting guidelines, and cite them as:

Little J, Higgins JP, Ioannidis JP, Moher D, Gagnon F, von Elm E, Khoury MJ, Cohen B, Davey-Smith G, Grimshaw J, Scheet P, Gwinn M, Williamson RE, Zou GY, Hutchings K, Johnson CY, Tait V, Wiens M, Golding J, van Duijn C, McLaughlin J, Paterson A, Wells G, Fortier I, Freedman M, Zecevic M, King R, Infante-Rivard C, Stewart A, Birkett N; STrengthening the REporting of Genetic Association Studies. STrengthening the REporting of Genetic Association Studies (STREGA): An Extension of the STROBE Statement.

|          |     | Reporting Item                                                                                                                                                    | Page Number |
|----------|-----|-------------------------------------------------------------------------------------------------------------------------------------------------------------------|-------------|
| Title    | #1a | Indicate the study's design with a commonly used term in the title or the abstract                                                                                | 1           |
| Abstract | #1b | Provide in the abstract an informative and balanced summary of what was done and what was found                                                                   | 2           |
|          | #2  | Explain the scientific background and rationale for the investigation being reported                                                                              | 4           |
|          | #3  | State specific objectives, including any prespecified hypotheses. State if the study is the first report of a genetic association, a replication effort, or both. | 5           |
|          | #4  | Present key elements of study design early in the paper                                                                                                           | 5           |
|          | #5  | Describe the setting, locations, and relevant dates, including periods of recruitment, exposure, follow-up, and data collection                                   | 5-6         |

|    |      |                                                                                                                                            |     |
|----|------|--------------------------------------------------------------------------------------------------------------------------------------------|-----|
| 1  | #6a  | Cohort study – Give the eligibility criteria, and the sources and methods                                                                  | 5-6 |
| 2  |      | of selection of participants. Describe methods of follow-up. Case-control                                                                  |     |
| 3  |      | study – Give the eligibility criteria, and the sources and methods of case                                                                 |     |
| 4  |      | ascertainment and control selection. Give the rationale for the choice of                                                                  |     |
| 5  |      | cases and controls. Cross-sectional study – Give the eligibility criteria,                                                                 |     |
| 6  |      | and the sources and methods of selection of participants. Give                                                                             |     |
| 7  |      | information on the criteria and methods for selection of subsets of                                                                        |     |
| 8  |      | participants from a larger study, when relevant.                                                                                           |     |
| 9  |      |                                                                                                                                            |     |
| 10 |      |                                                                                                                                            |     |
| 11 |      |                                                                                                                                            |     |
| 12 |      |                                                                                                                                            |     |
| 13 |      |                                                                                                                                            |     |
| 14 | #6b  | Cohort study – For matched studies, give matching criteria and number                                                                      | n/a |
| 15 |      | of exposed and unexposed. Case-control study – For matched studies,                                                                        |     |
| 16 |      | give matching criteria and the number of controls per case.                                                                                |     |
| 17 |      |                                                                                                                                            |     |
| 18 |      |                                                                                                                                            |     |
| 19 | #7a  | Clearly define all outcomes, exposures, predictors, potential                                                                              | 7-8 |
| 20 |      | confounders, and effect modifiers. Give diagnostic criteria, if applicable                                                                 |     |
| 21 |      |                                                                                                                                            |     |
| 22 |      |                                                                                                                                            |     |
| 23 | #7b  | Clearly define genetic exposures (genetic variants) using a widely-used                                                                    | 6-7 |
| 24 |      | nomenclature system. Identify variables likely to be associated with                                                                       |     |
| 25 |      | population stratification (confounding by ethnic origin).                                                                                  |     |
| 26 |      |                                                                                                                                            |     |
| 27 |      |                                                                                                                                            |     |
| 28 | #8a  | For each variable of interest give sources of data and details of methods                                                                  | 5-6 |
| 29 |      | of assessment (measurement). Describe comparability of assessment                                                                          |     |
| 30 |      | methods if there is more than one group. Give information separately for                                                                   |     |
| 31 |      | for exposed and unexposed groups if applicable.                                                                                            |     |
| 32 |      |                                                                                                                                            |     |
| 33 |      |                                                                                                                                            |     |
| 34 |      |                                                                                                                                            |     |
| 35 | #8b  | Describe laboratory methods, including source and storage of DNA,                                                                          | 6-7 |
| 36 |      | genotyping methods and platforms (including the allele calling algorithm                                                                   |     |
| 37 |      | used, and its version), error rates and call rates. State the laboratory /                                                                 |     |
| 38 |      | centre where genotyping was done. Describe comparability of laboratory                                                                     |     |
| 39 |      | methods if there is more than one group. Specify whether genotypes                                                                         |     |
| 40 |      | were assigned using all of the data from the study simultaneously or in                                                                    |     |
| 41 |      | smaller batches.                                                                                                                           |     |
| 42 |      |                                                                                                                                            |     |
| 43 |      |                                                                                                                                            |     |
| 44 |      |                                                                                                                                            |     |
| 45 |      |                                                                                                                                            |     |
| 46 | #9a  | Describe any efforts to address potential sources of bias                                                                                  | 8-9 |
| 47 |      |                                                                                                                                            |     |
| 48 | #9b  | Describe any efforts to address potential sources of bias                                                                                  | 8-9 |
| 49 |      |                                                                                                                                            |     |
| 50 |      |                                                                                                                                            |     |
| 51 | #10  | Explain how the study size was arrived at                                                                                                  | 5-6 |
| 52 |      |                                                                                                                                            |     |
| 53 | #11  | Explain how quantitative variables were handled in the analyses. If                                                                        | 6   |
| 54 |      | applicable, describe which groupings were chosen, and why. If                                                                              |     |
| 55 |      | applicable, describe how effects of treatment were dealt with.                                                                             |     |
| 56 |      |                                                                                                                                            |     |
| 57 |      |                                                                                                                                            |     |
| 58 |      |                                                                                                                                            |     |
| 59 | #12a | Describe all statistical methods, including those used to control for                                                                      | 8-9 |
| 60 |      | For peer review only - <a href="http://bmjopen.bmj.com/site/about/guidelines.xhtml">http://bmjopen.bmj.com/site/about/guidelines.xhtml</a> |     |

|    |                                                                                 |      |
|----|---------------------------------------------------------------------------------|------|
| 1  | confounding. State software version used and options (or settings)              |      |
| 2  | chosen.                                                                         |      |
| 3  |                                                                                 |      |
| 4  | #12b Describe any methods used to examine subgroups and interactions            | 9    |
| 5  |                                                                                 |      |
| 6  | #12c Explain how missing data were addressed                                    | 9    |
| 7  |                                                                                 |      |
| 8  | #12d If applicable, explain how loss to follow-up was addressed                 | n/a  |
| 9  |                                                                                 |      |
| 10 |                                                                                 |      |
| 11 | #12e Describe any sensitivity analyses                                          | 9    |
| 12 |                                                                                 |      |
| 13 | #12f State whether Hardy-Weinberg equilibrium was considered and, if so,        | 7    |
| 14 | how.                                                                            |      |
| 15 |                                                                                 |      |
| 16 |                                                                                 |      |
| 17 | #12g Describe any methods used for inferring genotypes or haplotypes            | 7    |
| 18 |                                                                                 |      |
| 19 | #12h Describe any methods used to assess or address population                  | 7    |
| 20 | stratification.                                                                 |      |
| 21 |                                                                                 |      |
| 22 |                                                                                 |      |
| 23 | #12i Describe any methods used to address multiple comparisons or to            | 7    |
| 24 | control risk of false positive findings.                                        |      |
| 25 |                                                                                 |      |
| 26 |                                                                                 |      |
| 27 | #12j Describe any methods used to address and correct for relatedness           | n/a  |
| 28 | among subjects                                                                  |      |
| 29 |                                                                                 |      |
| 30 |                                                                                 |      |
| 31 | #13a Report numbers of individuals at each stage of study—eg numbers            | 5-6  |
| 32 | potentially eligible, examined for eligibility, confirmed eligible, included in |      |
| 33 | the study, completing follow-up, and analysed. Give information                 |      |
| 34 | separately for for exposed and unexposed groups if applicable. Report           |      |
| 35 | numbers of individuals in whom genotyping was attempted and numbers             |      |
| 36 | of individuals in whom genotyping was successful.                               |      |
| 37 |                                                                                 |      |
| 38 |                                                                                 |      |
| 39 |                                                                                 |      |
| 40 |                                                                                 |      |
| 41 | #13b Give reasons for non-participation at each stage                           | n/a  |
| 42 |                                                                                 |      |
| 43 | #13c Consider use of a flow diagram                                             | n/a  |
| 44 |                                                                                 |      |
| 45 | #14a Give characteristics of study participants (eg demographic, clinical,      | 9-10 |
| 46 | social) and information on exposures and potential confounders. Give            |      |
| 47 | information separately for exposed and unexposed groups if applicable.          |      |
| 48 | Consider giving information by genotype                                         |      |
| 49 |                                                                                 |      |
| 50 |                                                                                 |      |
| 51 |                                                                                 |      |
| 52 | #14b Indicate number of participants with missing data for each variable of     | 9-10 |
| 53 | interest                                                                        |      |
| 54 |                                                                                 |      |
| 55 |                                                                                 |      |
| 56 | #14c Cohort study – Summarize follow-up time, e.g. average and total            | n/a  |
| 57 | amount.                                                                         |      |
| 58 |                                                                                 |      |
| 59 |                                                                                 |      |
| 60 |                                                                                 |      |

- 1 #15 Cohort study Report numbers of outcome events or summary measures 9/10  
 2 over time. Give information separately for exposed and unexposed  
 3 groups if applicable. Report outcomes (phenotypes) for each genotype  
 4 category over time Case-control study – Report numbers in each  
 5 exposure category, or summary measures of exposure. Give information  
 6 separately for cases and controls . Report numbers in each genotype  
 7 category. Cross-sectional study – Report numbers of outcome events or  
 8 summary measures. Give information separately for exposed and  
 9 unexposed groups if applicable. Report outcomes (phenotypes) for each  
 10 genotype category  
 11  
 12  
 13  
 14  
 15  
 16  
 17 #16a Give unadjusted estimates and, if applicable, confounder-adjusted 10-11  
 18 estimates and their precision (eg, 95% confidence interval). Make clear  
 19 which confounders were adjusted for and why they were included  
 20  
 21  
 22 #16b Report category boundaries when continuous variables were categorized 10-11  
 23  
 24 #16c If relevant, consider translating estimates of relative risk into absolute 10-11  
 25 risk for a meaningful time period  
 26  
 27  
 28 #16d Report results of any adjustments for multiple comparisons 10-11  
 29  
 30 #17a Report other analyses done—e.g., analyses of subgroups and 10-11  
 31 interactions, and sensitivity analyses  
 32  
 33 #17b Report other analyses done—e.g., analyses of subgroups and 10-11  
 34 interactions, and sensitivity analyses  
 35  
 36 #17c Report other analyses done—e.g., analyses of subgroups and 10-11  
 37 interactions, and sensitivity analyses  
 38  
 39  
 40 #18 Summarise key results with reference to study objectives 11-13  
 41  
 42  
 43 #19 Discuss limitations of the study, taking into account sources of potential 13-14  
 44 bias or imprecision. Discuss both direction and magnitude of any  
 45 potential bias.  
 46  
 47  
 48 #20 Give a cautious overall interpretation considering objectives, limitations, 14  
 49 multiplicity of analyses, results from similar studies, and other relevant  
 50 evidence.  
 51  
 52  
 53 #21 Discuss the generalisability (external validity) of the study results 14  
 54  
 55  
 56 #22 Give the source of funding and the role of the funders for the present 15  
 57  
 58  
 59



1 study and, if applicable, for the original study on which the present article  
2 is based  
3

4 The STREGA checklist is distributed under the terms of the Creative Commons Attribution License  
5 CC-BY. This checklist was completed on 22. September 2018 using <http://www.goodreports.org/>, a  
6 tool made by the [EQUATOR Network](#) in collaboration with [Penelope.ai](#)  
7  
8  
9  
10  
11  
12  
13  
14  
15  
16  
17  
18  
19  
20  
21  
22  
23  
24  
25  
26  
27  
28  
29  
30  
31  
32  
33  
34  
35  
36  
37  
38  
39  
40  
41  
42  
43  
44  
45  
46  
47  
48  
49  
50  
51  
52  
53  
54  
55  
56  
57  
58  
59  
60

# BMJ Open

## The association between genetically determined leptin and blood lipids considering alcohol consumption: a Mendelian randomization study

|                                 |                                                                                                                                                                                                                                                                                                                                                                                                                                                                                                                                                                                                                                                                                                                                                                                                                         |
|---------------------------------|-------------------------------------------------------------------------------------------------------------------------------------------------------------------------------------------------------------------------------------------------------------------------------------------------------------------------------------------------------------------------------------------------------------------------------------------------------------------------------------------------------------------------------------------------------------------------------------------------------------------------------------------------------------------------------------------------------------------------------------------------------------------------------------------------------------------------|
| Journal:                        | <i>BMJ Open</i>                                                                                                                                                                                                                                                                                                                                                                                                                                                                                                                                                                                                                                                                                                                                                                                                         |
| Manuscript ID                   | bmjopen-2018-026860.R2                                                                                                                                                                                                                                                                                                                                                                                                                                                                                                                                                                                                                                                                                                                                                                                                  |
| Article Type:                   | Original research                                                                                                                                                                                                                                                                                                                                                                                                                                                                                                                                                                                                                                                                                                                                                                                                       |
| Date Submitted by the Author:   | 05-Jul-2019                                                                                                                                                                                                                                                                                                                                                                                                                                                                                                                                                                                                                                                                                                                                                                                                             |
| Complete List of Authors:       | Shen, Luqi; University of Georgia College of Public Health, Department of Epidemiology and Biostatistics<br>Cordero, José ; University of Georgia College of Public Health, Department of Epidemiology and Biostatistics<br>Wang, Jia-Sheng; University of Georgia College of Public Health, Department of Environmental Health Science<br>Shen, Ye; University of Georgia College of Public Health, Department of Epidemiology and Biostatistics<br>Li, Shengxu; Children's Hospitals and Clinics of Minnesota, Children's Minnesota Research Institute<br>Liang, Lirong; Beijing Chaoyang Hospital<br>Zou, Zhiyong; Peking University School of Public Health, Institute of Child and Adolescent Health<br>Li, Changwei; University of Georgia College of Public Health, Department of Epidemiology and Biostatistics |
| <b>Primary Subject Heading</b>: | Epidemiology                                                                                                                                                                                                                                                                                                                                                                                                                                                                                                                                                                                                                                                                                                                                                                                                            |
| Secondary Subject Heading:      | Public health, Genetics and genomics                                                                                                                                                                                                                                                                                                                                                                                                                                                                                                                                                                                                                                                                                                                                                                                    |
| Keywords:                       | EPIDEMIOLOGY, leptin, lipids, alcohol consumption, genetic risk score                                                                                                                                                                                                                                                                                                                                                                                                                                                                                                                                                                                                                                                                                                                                                   |
|                                 |                                                                                                                                                                                                                                                                                                                                                                                                                                                                                                                                                                                                                                                                                                                                                                                                                         |

SCHOLARONE™  
Manuscripts

1  
2  
3 1 **The association between genetically determined leptin and blood lipids considering alcohol**  
4  
5 **consumption: a Mendelian randomization study**  
6  
7

8 **Running title: Genetically determined leptin and lipids**  
9

10  
11 4 Luqi Shen<sup>a</sup>, José F. Cordero<sup>a</sup>, Jia-Sheng Wang<sup>b</sup>, Ye Shen<sup>a</sup>, Shengxu Li<sup>c</sup>, Lirong Liang<sup>d</sup>, Zhi-  
12  
13 5 Yong Zou<sup>e</sup>, Changwei Li<sup>a</sup>  
14  
15

16  
17 6 Author names and affiliations:  
18

- 19  
20 7 a. Department of Epidemiology and Biostatistics, College of Public Health, University of  
21  
22 8 Georgia, Health Sciences Campus, 101 Buck Road, Athens, GA 30602, USA.  
23  
24 9 b. Department of Environmental Health Science, College of Public Health, University of  
25  
26 10 Georgia, 150 East Green Street, Athens, GA 30602, USA.  
27  
28 11 c. Children's Minnesota Research Institute, Children's Hospitals and Clinics of Minnesota,  
29  
30 12 Minneapolis, MN 55404, USA.  
31  
32 13 d. Clinical Epidemiology and Tobacco Dependence Treatment Research Department,  
33  
34 14 Beijing Institute of Respiratory Medicine, Beijing Chaoyang Hospital, Capital Medical  
35  
36 15 University, Beijing, China;  
37  
38 16 e. Institute of Child and Adolescent Health, School of Public Health, Peking University,  
39  
40 17 The Public Health Building in Peking University Health Science Center, Beijing 100191,  
41  
42 18 China  
43  
44  
45  
46  
47  
48  
49

50 20 **Corresponding authors:**  
51  
52  
53  
54  
55  
56  
57  
58  
59  
60

1 **Changwei Li**, Department of Epidemiology and Biostatistics, College of Public Health,  
2 University of Georgia, 120 B.S. Miller Hall, Health Sciences Campus, 101 Buck Road, Athens,  
3 GA 30602, USA. Telephone: 706.583.0918, Email: [changwei.li@uga.edu](mailto:changwei.li@uga.edu)

4 **Zhi-Yong Zou**, Institute of Child and Adolescent Health, School of Public Health, Peking  
5 University, The Public Health Building in Peking University Health Science Center, 38 Xue  
6 Yuan Road, Haidian District, Beijing 100191, China. Email: [harveyzou2002@bjmu.edu.cn](mailto:harveyzou2002@bjmu.edu.cn);

7  
8 **Word count: 3,356**

## Abstract

**Objectives:** The objective of this study was to evaluate the association of genetically determined leptin with lipids.

**Design:** We conducted a Mendelian randomization study to assess a potential causal relationship between serum leptin and lipid levels. We also evaluated whether alcohol drinking modified the associations of genetically determined leptin with blood lipids.

**Setting and Participants:** 3,860 participants of the Framingham Heart Study 3<sup>rd</sup> Generation cohort.

**Results:** Both genetic risk scores (GRSs), the GRS generated using leptin loci independent of body mass index (BMI) and GRS generated using leptin loci dependent of BMI, were positively associated with log transformed leptin (log-leptin). The BMI independent leptin GRS was associated with log transformed triglycerides (log-TG) ( $\beta=-0.66$ ,  $p=0.01$ ), but not low density lipoprotein cholesterol (LDL-C) ( $p=0.99$ ), high density lipoprotein cholesterol (HDL-C) ( $p=0.44$ ), or total cholesterol (TC) ( $p=0.49$ ). Instrumental variable estimation showed that per unit increase in genetically determined log-leptin was associated with 0.55 (95% confidence interval: 0.05-1.00) units decrease in log-TG. Besides significant association with log-TG ( $\beta=-0.59$ ,  $p=0.009$ ), the BMI dependent GRS was nominally associated with HDL-C ( $\beta=-10.67$ ,  $p=0.09$ ) and TC ( $\beta=-28.05$ ,  $p=0.08$ ). When stratified by drinking status, the BMI dependent GRS was associated with reduced levels of LDL-C ( $p=0.03$ ), log-TG ( $p=0.004$ ), and TC ( $p=0.003$ ) among non-current drinkers only. Significant interactions between the BMI dependent GRS and alcohol drinking were identified for LDL-C ( $p=0.03$ ), TG ( $p=0.03$ ), and TC ( $p=0.02$ ).

**Conclusion:** These findings together indicated that genetically determined leptin was negatively associated with lipid levels and the association may be modified by alcohol consumption.

1  
2  
3 **1 Keywords:** leptin, lipids, alcohol consumption, genetic risk score  
4  
5

6 **2 Strengths and limitations of this study:**  
7

- 8  
9 • Population-based Mendelian randomization studies may offer an opportunity to provide  
10  
11 better evidence for the association of leptin with lipid metabolism in the adult population  
12  
13 compared with observational epidemiology studies.  
14  
15  
16 • The stringent quality control methods were used in measuring genotypes, phenotype, and  
17  
18 covariates in the current study to reduce measurement error and increase the statistical  
19  
20 power.  
21  
22  
23 • Pleiotropy effects of SNPs included in the leptin genetic risk score (GRS) may confound  
24  
25 the leptin GRS and lipids associations.  
26  
27  
28 • Our analyses were restricted to individuals of European ancestry.  
29  
30  
31  
32  
33  
34  
35  
36  
37  
38  
39  
40  
41  
42  
43  
44  
45  
46  
47  
48  
49  
50  
51  
52  
53  
54  
55  
56  
57  
58  
59  
60

## Introduction

1  
2  
3  
4  
5  
6  
7  
8  
9  
10  
11  
12  
13  
14  
15  
16  
17  
18  
19  
20  
21  
22  
23  
24  
25  
26  
27  
28  
29  
30  
31  
32  
33  
34  
35  
36  
37  
38  
39  
40  
41  
42  
43  
44  
45  
46  
47  
48  
49  
50  
51  
52  
53  
54  
55  
56  
57  
58  
59  
60

1  
2  
3  
4  
5  
6  
7  
8  
9  
10  
11  
12  
13  
14  
15  
16  
17  
18  
19  
20  
21  
22  
23  
24  
25  
26  
27  
28  
29  
30  
31  
32  
33  
34  
35  
36  
37  
38  
39  
40  
41  
42  
43  
44  
45  
46  
47  
48  
49  
50  
51  
52  
53  
54  
55  
56  
57  
58  
59  
60

Leptin is a key hormone that regulates appetite and food intake, body weight, and energy balance.<sup>1 2</sup> Leptin is secreted primarily from the stomach, placenta, and adipose tissue.<sup>3</sup> Biological studies have demonstrated that elevated leptin levels may play an important role in the pathogenesis of lipid accumulation.<sup>4-9</sup> As an active endocrine organ, the adipose tissue secretes leptin and plays a key role in immunometabolism.<sup>10</sup> Leptin can regulate both innate and adaptive immune responses<sup>11 12</sup> and subsequently regulate lipid profiles. Animal study demonstrated that hyperleptinemia decreases the expression of SREBP-1c, a master regulator of lipid metabolism, in liver and adenovirus-induced hyperleptinemia decreases triglyceride synthesis through SREBP-1c down-regulation.<sup>13</sup> Meanwhile, SREBP-1c is involved in innate immune response in Macrophages<sup>14</sup>. Therefore, it is rational to see immune connects with leptin in respect of lipid regulation. Case reports and case series have documented that leptin therapy can improve lipid profiles among patients with lipoatrophy or congenital leptin deficiency.<sup>15-19</sup> On contrary, in a cross-sectional survey of 12-16 years old high school students, plasma leptin was positively associated with total cholesterol (TC), high density lipoprotein cholesterol (HDL-C), low-density lipoprotein cholesterol (LDL-C), and triglycerides (TG).<sup>20</sup> Since observational epidemiologic studies cannot rule out all confounding effects, it is unclear whether such an association is causal. On the other hand, there are studies that demonstrate a neutral effect of leptin on blood lipid levels.<sup>21</sup> A small clinical trial that involved 17 patients with HIV-associated lipodystrophy suggested that leptin treatment did not improve fasting lipid kinetics.<sup>21</sup> Population-based Mendelian randomization studies may offer an opportunity to provide better evidence for the effect of leptin on lipid metabolism in the adult population. Recently, a large-scale genome-wide association study (GWAS) meta-analysis identified five genomic loci associated with circulating

1 leptin,<sup>22</sup> which provides an opportunity to conduct a Mendelian randomization study to delineate  
2 the association between serum leptin and lipids levels. In addition, alcohol consumption has been  
3 shown to influence leptin secretion in both human and animal models.<sup>23-36</sup> In rodent models,  
4 leptin has been demonstrated to be increased<sup>26-28</sup> or decreased<sup>29 30</sup> after alcohol intake.  
5 Similarly, leptin levels in human was decreased,<sup>32</sup> increased,<sup>31 33</sup> or even unchanged<sup>34-36</sup> after  
6 drinking. It is unclear whether alcohol consumption modifies the association of genetically  
7 determined leptin with lipid levels.<sup>37 38</sup>

8 Therefore, the objectives of the current study were to evaluate the relationship between  
9 genetically determined leptin and lipid levels and to explore whether the leptin-lipids  
10 associations could be modified by alcohol consumption among participants of the Framingham  
11 Heart Study (FHS) 3<sup>rd</sup> generation cohort.

## 12 **Materials and Methods**

### 13 **Data Sources and Study Participants**

14 The FHS was designed to identify common factors or characteristics that contribute to  
15 cardiovascular disease (CVD) by tracking the development of CVD over a long period of time.  
16 Participants of the FHS were free from overt symptoms of CVD or stroke at baseline. Later on,  
17 the FHS was extended to including offspring and third generation of the original participants. A  
18 detailed description of the FHS 3<sup>rd</sup> generation cohort has been outlined in previous  
19 publications.<sup>39</sup> Genotype and phenotype data of the FHS are cataloged on the database of  
20 genotype and phenotype (dbGaP) at the National Center for Biotechnology Information (NCBI).  
21 We have received approval to use the FHS data by the Institutional Review Boards at the  
22 University of Georgia and the NCBI. Circulating leptin levels, genotypes, lipid levels, and



1 important covariates were available for 3,860 (94.7%) participants of the 3<sup>rd</sup> generation cohort at  
2 baseline in 2002-2005 (**Table 1**). Those participants were included in the current analyses.

### 3 **Genotyping and Genetic Risk Score**

4 Genetic loci for circulating leptin levels have been reported in a large genome-wide  
5 association studies (GWAS) meta-analysis by Kilpelainen and colleagues.<sup>22</sup> This study included  
6 32,161 individuals of European ancestry and identified three single-nucleotide polymorphisms  
7 (SNPs), *GCKR* rs780093, *LEP* rs10487505, and *SLC32A1* rs6071166, that were robustly  
8 associated with body mass index (BMI) adjusted leptin at a genome-wide significance level  
9 ( $p < 5 \times 10^{-08}$ ). In addition, *GCKR* rs780093, *CCNLI* rs900400, and *FTO* rs8043757 were  
10 associated with circulating leptin without adjustment for BMI.<sup>22</sup> We assumed the additive  
11 genetic model for each SNP and constructed two genetic risk scores (GRSs) for leptin by  
12 combining leptin-increasing alleles for SNPs weighted by their corresponding effect sizes on  
13 logarithmically transformed leptin (log-leptin) as reported in the original GWAS meta-analysis.<sup>22</sup>  
14 The first score, GRS1, was generated using the three SNPs associated with BMI adjusted leptin,  
15 and the second score, GRS2, using the three SNPs associated with leptin unadjusted for BMI.

16 Genome-wide SNPs were genotyped using Affymetrix and Illumina platforms in the  
17 FHS. The 1000 Genome genotype data for the FHS was already imputed and cataloged on the  
18 dbGaP. According to the document of the FHS,<sup>40</sup> before imputation, quality control removed  
19 SNPs with a Hardy-Weinberg equilibrium  $p < 1 \times 10^{-6}$ , a missing rate  $> 3.1\%$ , a minor allele  
20 frequency (MAF)  $< 1\%$ , a missing physical position or cannot mapped to build 37 positions,  
21 Mendelian errors  $> 1000$ , or duplicate SNPs. MACH software was used for genotype phasing,  
22 followed by imputation using MiniMac software.<sup>41 42</sup> Imputation results were summarized as

1 dosage scores, which represent the expected numbers of copies of the coded allele for each SNP,  
2 ranging from 0 to 2. After imputation, SNPs with  $r^2 < 0.30$ , an MAF  $< 1\%$ , or a Hardy-Weinberg  
3 equilibrium  $p < 1 \times 10^{-6}$  were removed. We retrieved genotypes of the SNPs for GRSs from the  
4 imputed data for all study participants (**Supplemental Table S1 and Supplemental Table S2**).

### 5 **Leptin and Lipids measurement**

6 In the FHS, blood samples were collected after overnight fasting and analyzed following  
7 standard protocols.<sup>43</sup> Serum leptin levels were determined by enzyme-linked immunosorbent  
8 assay (ELISA) method at R&D Systems using the Quantikine Human Leptin Immunoassay.<sup>43</sup>  
9 Leptin was logarithmically transformed for analyses in the current study so that the data  
10 distribution can meet the assumptions of linear regression models.

11 Fasting blood lipids, including TC, HDL-C, and TG, were measured using automated  
12 enzymatic assays.<sup>43</sup> For participants taking lipid-lowering medications, TC was adjusted as  
13 TC/0.8.<sup>44</sup> After adjustment, LDL-C was calculated using the Friedewald formula.<sup>45</sup> The adjusted  
14 TC and LDL-C were used for analyses in the current study. Triglycerides were logarithmically  
15 transformed (log-TG) in the current study so that the data distribution can meet the assumptions  
16 of linear regression models.

### 17 **Covariates**

18 Demographic and health behavioral variables, including age, gender, education, smoking,  
19 and drinking, were based on self-report. Education levels were categorized into “no more than  
20 high school,” “some college,” and “bachelor’s degree or above.” Smoking was categorized into  
21 “current smoker” or “not a current smoker” and drinking status into “current drinker” and “not a

1 current drinker.” Physical activity was measured with the physical activity index composite  
2 score, which was calculated by summing the number of hours spent in each activity intensity  
3 level weighted by their corresponding weight factor derived from the estimated oxygen  
4 consumption requirement for each intensity level.<sup>46</sup> BMI was calculated as weight in kilograms  
5 divided by the square of height in meters. Waist circumference was measured to next lower 1/4  
6 inch by regional anthropometry.

## 7 **Statistical Analysis**

8 Weighted GRSs for leptin were calculated for each participant as the sum of the products  
9 of the participant’s dosage scores for each SNP and the SNP’s estimated effect size. Since  
10 obesity is highly associated with both leptin and blood lipids, our main focus was on GRS1, the  
11 score generated using loci associated with leptin independent of BMI. The GRS1 for participants  
12 was then categorized into quartiles. Means and standard deviations for continuous and  
13 frequencies and percentages for categorical characteristics at baseline were calculated for each  
14 quartile of the GRS1. *p* values for linear trends in those variables across quartiles of the GRS1  
15 were estimated.

16 Three multivariate linear regression models were used to assess associations between log-  
17 leptin and lipids, leptin GRS and log-leptin, and the leptin GRS and lipids, respectively. All  
18 models were adjusted for age, sex, BMI, and waist circumference. To test robustness of the  
19 leptin GRS and lipids associations, we additionally controlled for education, smoking, drinking,  
20 and physical activity index score in the fully adjusted models. To explore whether associations  
21 between the leptin GRS and lipids levels were modified by alcohol consumption, we performed  
22 stratified analyses by drinking status. In each stratum of the drinking status, we tested

1 associations between leptin GRS and lipids by adjusting for age, sex, BMI, and waist  
2 circumference in the base model and additionally adjusting for education, smoking, and physical  
3 activity in the full model. Interactions between the leptin GRS and alcohol consumption were  
4 tested among the overall participants by adding drinking and the interaction term, GRS×drinking,  
5 to the models. All the above analyses were done for GRS1 and GRS2 separately. We quantified  
6 the strength of the causal association of leptin with lipids using the instrumental variable  
7 estimator.<sup>47</sup> The estimator was calculated as the ratio of the coefficient for leptin GRS and lipids  
8 association to the coefficient for the leptin GRS and log-leptin association from the base models.

9 To rule out the effect of lipid-lowering medications, sensitivity analyses were performed  
10 among those not taking lipid medication. To rule out the effect of both diabetes and lipid-  
11 lowering medications, sensitivity analyses were performed among those not taking lipid- or  
12 glucose-lowering medications. All analyses were performed using SAS software (version 9.4;  
13 SAS Institute Inc., Cary, North Carolina). Two-sided *p* values were provided, and *p*<0.05 was  
14 considered significant.

## 15 **Participant and Public Involvement**

16 Neither patients or public were directly involved in the development, design or  
17 recruitment of the study. Results will not be disseminated directly to study participants.

## 18 **Results**

19 Characteristics of the study participants are presented in **Table 1**. Participants were on  
20 average 40.2 years old at baseline. There were slightly more females (53.2%), and only 15.4%  
21 had less than a high school education. The majority (89.1%) of the participants were current

1 drinkers, and 15.6% were current smokers. Participants were on average over weighted, with a  
2 mean BMI of 26.9 kg/m<sup>2</sup> and mean waist girth of 36.6 inches. About 6.9% of the participants  
3 were treated for dyslipidemia, and 1.9% were treated for diabetes. The BMI independent leptin  
4 GRS1 was not associated with age ( $p=0.23$ ), sex ( $p=0.89$ ), education ( $p=0.22$ ), smoking  
5 ( $p=0.53$ ), drinking ( $p=0.32$ ), BMI ( $p=0.94$ ), waist circumference ( $p=0.70$ ), lipid-lowering  
6 medication usage ( $p=0.26$ ), or the physical activity index score ( $p=0.51$ ), but with diabetes-  
7 lowering medication usage ( $p=0.03$ ). As expected, the GRS1 was positively associated with age,  
8 sex, BMI, and waist circumference adjusted log-leptin ( $p=4.56\times 10^{-5}$ ).

### 9 **BMI independent leptin GRS1 and blood lipids**

10 After controlling for age, sex, BMI, and waist circumference, log-leptin was positively  
11 associated with TC ( $\beta=8.56$ ,  $p=6.35\times 10^{-18}$ ), LDL-C ( $\beta=6.46$ ,  $p=1.85\times 10^{-13}$ ), and log-TG ( $\beta=0.13$ ,  
12  $p=1.59\times 10^{-20}$ ), but was not associated with HDL-C ( $\beta=-0.62$ ,  $p=0.11$ ) (**Figure 1 and**  
13 **Supplemental Figure S1**). Per unit increase in the leptin GRS1 was associated with a 1.21-unit  
14 increase in the age, sex, BMI, and waist circumference adjusted log-leptin ( $p=4.56\times 10^{-5}$ ). The  
15 leptin GRS1 was inversely associated with age, sex, BMI, and waist circumference adjusted log-  
16 TG ( $\beta=-0.66$ ,  $p=0.01$ ) (**Figure 1**). When further adjusting for education, smoking, drinking, and  
17 physical activity, the GRS1 and log-TG association was still significant ( $\beta=-0.69$ ,  $p=0.008$ ,  
18 **Table 2**). Instrumental variable estimation indicated that log-TG levels decreased by 0.55 (95%  
19 CI: 0.05, 1.00,  $p=0.02$ ) per unit increase of genetically determined log-leptin level (**Figure 1**).  
20 The leptin GRS1 was inversely associated with TC ( $\beta=-12.50$ ,  $p=0.49$ ) and LDL-C ( $\beta=-0.11$ ,  
21  $p=0.99$ ) and positively associated with HDL-C ( $\beta=5.42$ ,  $p=0.44$ ), however, the correlations were

1 not significant. The GRS1 and blood lipids associations were not modified by drinking status  
2 (Table 2).

### 3 **BMI dependent leptin GRS2 and blood lipids**

4 As expected, the BMI dependent leptin GRS2 was not associated with any covariate  
5 except for the BMI ( $p=0.02$ ) and waist circumference ( $p=0.03$ ). In the analyses controlling for  
6 age, sex, BMI, and waist circumference, the GRS2 was significantly associated with lower levels  
7 of log-TG ( $p=0.009$ ) and nominally associated with lower levels of HDL-C ( $p=0.09$ ) and TC  
8 ( $p=0.08$ ) (Supplemental Figure S2). When stratified by drinking status, the leptin GRS2 was  
9 negatively associated with LDL-C ( $\beta=-92.51$ ,  $p=0.03$ ), log-TG ( $\beta=-2.07$ ,  $p=0.004$ ), and TC ( $\beta=-$   
10  $144.68$ ,  $p=0.003$ ) only among non-current drinkers (Table 3). When further adjusting for  
11 education, smoking, drinking, and physical activity, those associations persisted (Table 3).  
12 Furthermore, significant interactions between leptin GRS2 and alcohol drinking were identified  
13 for LDL-C ( $p=0.03$ ), log-TG ( $p=0.03$ ), and TC ( $p=0.02$ ) (Table 3).

14 When restricting to participants not taking lipid-lowering medication and those not taking  
15 lipid- or glucose-lowering medications, respectively, the associations of GRS1 and GRS2 with  
16 blood lipids were similar to those as shown above (Supplemental Table S3, S4, S5 and S6).

## 17 **Discussion**

18 To the best of our knowledge, the current study is the first Mendelian randomization  
19 analysis on leptin and blood lipids. We provide robust evidence to support a potentially causal  
20 relation between leptin and reduced levels of triglycerides among a majority of overweight and  
21 obese population of European ancestry. Furthermore, we demonstrated that alcohol consumption

1  
2  
3 1 modified the association of BMI dependent GRS2 with lipids in that genetically determined  
4  
5 2 leptin levels were inversely associated with LDL-C, log-TG, and TC, but only among individuals  
6  
7  
8 3 who were not current drinkers.  
9

10  
11 4 Both the BMI dependent- and independent- GRSs were associated with lower level of  
12  
13 5 log-TG in the current study. Inconsistent associations between leptin and blood lipids have been  
14  
15 6 observed in previous studies. In a small study of 80 postmenopausal women, serum leptin was  
16  
17 7 positively associated with HDL-C, TG, and TC, and inversely associated with LDL-C.<sup>48</sup> Another  
18  
19 8 study conducted with 294 healthy school children reported that leptin was only associated with  
20  
21 9 increased TG.<sup>49</sup> However, a study of 476 residents from Cameroon reported a positive  
22  
23 10 correlation between leptin, LDL-C, and TC, and a positive association between leptin and TC,  
24  
25 11 but no association between leptin and HDL-C or TG.<sup>50</sup> In a more recent study of 134 physically  
26  
27 12 active postmenopausal women, no significant correlation was detected for leptin and blood  
28  
29 13 lipids.<sup>51</sup> The divergent results of previous studies make it impossible to infer a relationship  
30  
31 14 between leptin and blood lipids. Possible reasons for the divergent findings include varying  
32  
33 15 sample sizes, failure to account for residual and unmeasured confounding, and the genetic  
34  
35 16 background of the study population. Through Mendelian randomization analyses, we  
36  
37 17 demonstrated that genetically determined leptin was inversely associated with log-TG. It is well  
38  
39 18 known that alleles, such as risk alleles for leptin, are randomly assigned at meiosis and therefore,  
40  
41 19 are independent of non-genetic confounders. The association between leptin GRS and log-TG in  
42  
43 20 the current study was less prone to confounding. This also highlights the importance of using  
44  
45 21 Mendelian randomization to delineate causal relationships. Our finding is further supported by  
46  
47 22 previous physiologic studies, among which, leptin was demonstrated to inhibit lipogenesis,  
48  
49 23 stimulate lipolysis, and reduce triglyceride uptake.<sup>52</sup> However, the association of HDL-C and TC  
50  
51  
52  
53  
54  
55  
56  
57  
58  
59  
60

1 were only nominally significant with BMI dependent GRS2 in the current study. It could be due  
2 to lack of statistical power or existing interaction of leptin and drinking. Therefore, we cannot  
3 rule out causal relationships between leptin and those lipid measures. Future large-scale  
4 Mendelian randomization studies are warranted to evaluate associations of leptin GRS with  
5 HDL-C, LDL-C, and TC.

6 The BMI independent GRS1 was only associated with log-TG, while the BMI dependent  
7 GRS2 was also in nominal associations with HDL-C and TC. In addition, alcohol drinking  
8 modified the GRS2-lipids associations but not the GRS1-lipids associations. This indicated that  
9 the role of leptin in blood lipids regulation may be through multiple mechanisms. The BMI  
10 dependent GRS2 were inversely associated with LDL-C, log-TG, and TC only among non-  
11 current drinkers, but not among current drinkers. Although future studies are warranted to  
12 confirm these interactions, previous physiological studies may provide a reasonable explanation.  
13 Singh and colleagues demonstrated that the increased expression of caveolin-1 impairs leptin  
14 signaling and attenuates leptin-dependent effect to prevent lipid accumulation in human white  
15 pre-adipocytes.<sup>53</sup> Meanwhile, Caveolin-1 can be increased by alcohol drinking.<sup>54</sup>

16 Our study represents the first Mendelian randomization analyses for leptin and blood  
17 lipids in a population of European ancestry. A major strength of this study is the stringent quality  
18 control methods used in measuring genotypes, phenotype, and covariates in the FHS 3<sup>rd</sup>  
19 Generation Cohort. Those methods can reduce measurement error and increase the statistical  
20 power needed to identify associations between leptin GRS and lipids. We also identify some  
21 limitations. First, pleiotropy effects of SNPs included in the leptin GRS may confound the leptin  
22 GRS and lipids associations. It is possible that our results may represent a shared genetic basis



1  
2  
3 1 between leptin and lipids rather than a causal relationship. Second, we may not have sufficient  
4  
5 2 power to detect associations between genetically determined leptin levels and LDL-C, HDL-C,  
6  
7 3 and TC. Larger Mendelian randomization studies are warranted to evaluate associations between  
8  
9 4 leptin and LDL-C, HDL-C, and TC. Third, we did not control for total energy intake in our  
10  
11 5 analyses because food frequency questionnaire survey was not conducted in the third generation  
12  
13 6 cohort at baseline when leptin was measured. However, leptin combines with receptors in the  
14  
15 7 hypothalamus to reduce appetite and increase energy expenditure. Therefore, total energy intake  
16  
17 8 is in the pathway from leptin to lipids metabolism and may not meet the criteria of being a  
18  
19 9 confounder. Forth, the type of alcohol consumed was not measured and cannot be considered in  
20  
21 10 the current analyses. It is possible that the alcohol consumed in the studied population is mainly  
22  
23 11 wine and/or beers, which contain high level of resveratrol and phytochemical. The two chemicals  
24  
25 12 may benefit lipid metabolism.<sup>55 56</sup> However, the two chemicals do not share similar genetic  
26  
27 13 profile with leptin, and consequently, they should not be correlated with leptin and cannot affect  
28  
29 14 the associations between leptin GRS and blood lipids. Fifth, genetically determined ratio of  
30  
31 15 leptin to leptin receptor may be a better measure to study the role of leptin in lipid metabolism.  
32  
33 16 However, we could not find a genome-wide study on the ratio of leptin to leptin receptor,  
34  
35 17 therefore, a GRS on the ratio cannot be calculated. Future genome-wide studies on the ratio of  
36  
37 18 leptin to leptin receptor are warranted. Finally, our analyses were restricted to individuals of  
38  
39 19 European ancestry. Our findings may not be generalizable to populations of other ancestries.

40  
41  
42  
43  
44  
45  
46  
47  
48 20 In summary, the present study provided robust evidence for a potential causal effect of  
49  
50 21 leptin on reduced triglycerides. In addition, genetically determined leptin may regulate blood  
51  
52 22 lipids through different mechanisms, and the association between leptin and lipid metabolism  
53  
54 23 may be modified by alcohol consumption.

## 1 **Acknowledgements**

2 We acknowledge editorial assistance of Ms. Jessica Ho.

## 3 **Author Contributions**

4 Conceptualization, Changwei Li, José Cordero, Jia-Sheng Wang, Shengxu Li, and Zhi-  
5 Yong Zou; Formal analysis, Luqi Shen and Ye Shen; Supervision, Changwei Li, José Cordero,  
6 Jia-Sheng Wang, Shengxu Li, and Zhi-Yong-Zou; Writing – original draft, Luqi Shen; Writing –  
7 review & editing, Changwei Li, José Cordero, Luqi Shen, Lirong Liang, and Zhi-Yong Zou.

## 8 **Conflict of interest**

9 Conflicts of interest and disclosures: none.

## 10 **Funding sources**

11 This study was supported by National Natural Science Foundation of China (81773454)  
12 and China Scholarship Council (201806015008).

## 13 **Data sharing statement**

14 The deidentified dataset supporting this study is available on the database of genotype  
15 and phenotype (dbGaP) at the National Center for Biotechnology Information (NCBI).  
16 [https://www.ncbi.nlm.nih.gov/projects/gap/cgi-bin/study.cgi?study\\_id=phs000007.v30.p11](https://www.ncbi.nlm.nih.gov/projects/gap/cgi-bin/study.cgi?study_id=phs000007.v30.p11). The  
17 researchers are able to reuse the dataset on the condition that they get the approval from dbGaP  
18 and their institution.

## References

1. Campfield LA, Smith FJ, Guisez Y, et al. Recombinant mouse OB protein: evidence for a peripheral signal linking adiposity and central neural networks. *Science* 1995;269(5223):546-9.
2. Halaas JL, Gajiwala KS, Maffei M, et al. Weight-reducing effects of the plasma protein encoded by the obese gene. *Science* 1995;269(5223):543-6.
3. Zhang Y, Proenca R, Maffei M, et al. Positional cloning of the mouse obese gene and its human homologue. *Nature* 1994;372(6505):425-32. doi: 10.1038/372425a0
4. Sainz N, Barrenetxe J, Moreno-Aliaga MJ, et al. Leptin resistance and diet-induced obesity: central and peripheral actions of leptin. *Metabolism: clinical and experimental* 2015;64(1):35-46. doi: 10.1016/j.metabol.2014.10.015
5. Wang MY, Lee Y, Unger RH. Novel form of lipolysis induced by leptin. *The Journal of biological chemistry* 1999;274(25):17541-4.
6. Harris RB. Direct and indirect effects of leptin on adipocyte metabolism. *Biochimica et biophysica acta* 2014;1842(3):414-23. doi: 10.1016/j.bbadis.2013.05.009
7. Enser M, Ashwell M. Fatty acid composition of triglycerides from adipose tissue transplanted between obese and lean mice. *Lipids* 1983;18(11):776-80.
8. Selenscig D, Rossi A, Chicco A, et al. Increased leptin storage with altered leptin secretion from adipocytes of rats with sucrose-induced dyslipidemia and insulin resistance: effect of dietary fish oil. *Metabolism: clinical and experimental* 2010;59(6):787-95. doi: 10.1016/j.metabol.2009.09.025
9. Kosztaczky B, Foris G, Paragh G, Jr., et al. Leptin stimulates endogenous cholesterol synthesis in human monocytes: New role of an old player in atherosclerotic plaque

- 1  
2  
3 1 formation. Leptin-induced increase in cholesterol synthesis. *The international journal of*  
4  
5 2 *biochemistry & cell biology* 2007;39(9):1637-45. doi: 10.1016/j.biocel.2007.04.012  
6  
7  
8 3 10. Francisco V, Pino J, Campos-Cabaleiro V, et al. Obesity, Fat Mass and Immune System:  
9  
10 4 Role for Leptin. *Front Physiol* 2018;9:640. doi: 10.3389/fphys.2018.00640 [published  
11  
12 5 Online First: 2018/06/01]  
13  
14  
15 6 11. La Cava A. Leptin in inflammation and autoimmunity. *Cytokine* 2017;98:51-58. doi:  
16  
17 7 10.1016/j.cyto.2016.10.011  
18  
19 8 12. Maurya R, Bhattacharya P, Dey R, et al. Leptin Functions in Infectious Diseases. *Front*  
20  
21 9 *Immunol* 2018;9:2741. doi: 10.3389/fimmu.2018.02741 [published Online First:  
22  
23 10 2018/11/26]  
24  
25  
26 11 13. Kakuma T, Lee Y, Higa M, et al. Leptin, troglitazone, and the expression of sterol regulatory  
27  
28 12 element binding proteins in liver and pancreatic islets. *Proc Natl Acad Sci U S A*  
29  
30 13 2000;97(15):8536-41. doi: 10.1073/pnas.97.15.8536  
31  
32  
33 14 14. Im SS, Yousef L, Blaschitz C, et al. Linking lipid metabolism to the innate immune response  
34  
35 15 in macrophages through sterol regulatory element binding protein-1a. *Cell Metab*  
36  
37 16 2011;13(5):540-9. doi: 10.1016/j.cmet.2011.04.001  
38  
39  
40 17 15. Paz-Filho G, Mastronardi CA, Licinio J. Leptin treatment: facts and expectations.  
41  
42 18 *Metabolism: clinical and experimental* 2015;64(1):146-56. doi:  
43  
44 19 10.1016/j.metabol.2014.07.014  
45  
46  
47 20 16. Park JY, Javor ED, Cochran EK, et al. Long-term efficacy of leptin replacement in patients  
48  
49 21 with Dunnigan-type familial partial lipodystrophy. *Metabolism: clinical and*  
50  
51 22 *experimental* 2007;56(4):508-16. doi: 10.1016/j.metabol.2006.11.010  
52  
53  
54  
55  
56  
57  
58  
59  
60

- 1  
2  
3 1 17. Javor ED, Cochran EK, Musso C, et al. Long-term efficacy of leptin replacement in patients  
4  
5 2 with generalized lipodystrophy. *Diabetes* 2005;54(7):1994-2002.  
6  
7  
8 3 18. Ebihara K, Kusakabe T, Hirata M, et al. Efficacy and safety of leptin-replacement therapy  
9  
10 4 and possible mechanisms of leptin actions in patients with generalized lipodystrophy. *The*  
11  
12 5 *Journal of clinical endocrinology and metabolism* 2007;92(2):532-41. doi:  
13  
14 6 10.1210/jc.2006-1546  
15  
16  
17 7 19. Kamran F, Rother KI, Cochran E, et al. Consequences of stopping and restarting leptin in an  
18  
19 8 adolescent with lipodystrophy. *Hormone research in paediatrics* 2012;78(5-6):320-5.  
20  
21 9 doi: 10.1159/000341398  
22  
23  
24 10 20. Wu DM, Shen MH, Chu NF. Relationship between plasma leptin levels and lipid profiles  
25  
26 11 among school children in Taiwan--the Taipei Children Heart Study. *European journal of*  
27  
28 12 *epidemiology* 2001;17(10):911-6.  
29  
30  
31 13 21. Sekhar RV, Jahoor F, Iyer D, et al. Leptin replacement therapy does not improve the  
32  
33 14 abnormal lipid kinetics of hypoleptinemic patients with HIV-associated lipodystrophy  
34  
35 15 syndrome. *Metabolism* 2012;61(10):1395-403. doi: 10.1016/j.metabol.2012.03.013  
36  
37 [published Online First: 2012/04/28]  
38  
39  
40 17 22. Kilpelainen TO, Carli JF, Skowronski AA, et al. Genome-wide meta-analysis uncovers novel  
41  
42 18 loci influencing circulating leptin levels. *Nature communications* 2016;7:10494. doi:  
43  
44 19 10.1038/ncomms10494  
45  
46  
47 20 23. Rojdmarm S, Calissendorff J, Brismar K. Alcohol ingestion decreases both diurnal and  
48  
49 21 nocturnal secretion of leptin in healthy individuals. *Clinical endocrinology*  
50  
51 22 2001;55(5):639-47.  
52  
53  
54  
55  
56  
57  
58  
59  
60

- 1  
2  
3 1 24. Roth MJ, Baer DJ, Albert PS, et al. Relationship between serum leptin levels and alcohol  
4  
5 2 consumption in a controlled feeding and alcohol ingestion study. *Journal of the National*  
6  
7 3 *Cancer Institute* 2003;95(22):1722-5.  
8  
9  
10 4 25. Otaka M, Konishi N, Odashima M, et al. Effect of alcohol consumption on leptin level in  
11  
12 5 serum, adipose tissue, and gastric mucosa. *Digestive diseases and sciences*  
13  
14 6 2007;52(11):3066-9. doi: 10.1007/s10620-006-9635-x  
15  
16  
17 7 26. Pravdova E, Macho L, Fickova M. Alcohol intake modifies leptin, adiponectin and resistin  
18  
19 8 serum levels and their mRNA expressions in adipose tissue of rats. *Endocrine regulations*  
20  
21 9 2009;43(3):117-25.  
22  
23  
24 10 27. Slomiany BL, Slomiany A. Role of epidermal growth factor receptor transactivation in the  
25  
26 11 activation of cytosolic phospholipase A(2) in leptin protection of salivary gland acinar  
27  
28 12 cells against ethanol cytotoxicity. *Journal of physiology and pharmacology : an official*  
29  
30 13 *journal of the Polish Physiological Society* 2009;60(2):49-55.  
31  
32  
33 14 28. Yu HC, Li SY, Cao MF, et al. Effects of chronic ethanol consumption on levels of  
34  
35 15 adipokines in visceral adipose tissues and sera of rats. *Acta pharmacologica Sinica*  
36  
37 16 2010;31(4):461-9. doi: 10.1038/aps.2010.12  
38  
39  
40 17 29. Maddalozzo GF, Turner RT, Edwards CH, et al. Alcohol alters whole body composition,  
41  
42 18 inhibits bone formation, and increases bone marrow adiposity in rats. *Osteoporosis*  
43  
44 19 *international : a journal established as result of cooperation between the European*  
45  
46 20 *Foundation for Osteoporosis and the National Osteoporosis Foundation of the USA*  
47  
48 21 2009;20(9):1529-38. doi: 10.1007/s00198-009-0836-y  
49  
50  
51  
52  
53  
54  
55  
56  
57  
58  
59  
60

- 1  
2  
3 1 30. Tan X, Sun X, Li Q, et al. Leptin deficiency contributes to the pathogenesis of alcoholic fatty  
4  
5 2 liver disease in mice. *The American journal of pathology* 2012;181(4):1279-86. doi:  
6  
7 3 10.1016/j.ajpath.2012.06.013  
8  
9  
10 4 31. Henriksen JH, Holst JJ, Moller S, et al. Increased circulating leptin in alcoholic cirrhosis:  
11  
12 5 relation to release and disposal. *Hepatology* 1999;29(6):1818-24. doi:  
13  
14 6 10.1002/hep.510290601  
15  
16  
17 7 32. Santolaria F, Perez-Cejas A, Aleman MR, et al. Low serum leptin levels and malnutrition in  
18  
19 8 chronic alcohol misusers hospitalized by somatic complications. *Alcohol and alcoholism*  
20  
21 9 2003;38(1):60-6.  
22  
23  
24 10 33. Nicolas JM, Fernandez-Sola J, Fatjo F, et al. Increased circulating leptin levels in chronic  
25  
26 11 alcoholism. *Alcoholism, clinical and experimental research* 2001;25(1):83-8.  
27  
28  
29 12 34. Beulens JW, de Zoete EC, Kok FJ, et al. Effect of moderate alcohol consumption on  
30  
31 13 adipokines and insulin sensitivity in lean and overweight men: a diet intervention study.  
32  
33 14 *European journal of clinical nutrition* 2008;62(9):1098-105. doi:  
34  
35 15 10.1038/sj.ejcn.1602821  
36  
37  
38 16 35. Voican CS, Njike-Nakseu M, Boujedidi H, et al. Alcohol withdrawal alleviates adipose tissue  
39  
40 17 inflammation in patients with alcoholic liver disease. *Liver international : official journal*  
41  
42 18 *of the International Association for the Study of the Liver* 2015;35(3):967-78. doi:  
43  
44 19 10.1111/liv.12575  
45  
46  
47 20 36. Greco AV, Mingrone G, Favuzzi A, et al. Serum leptin levels in post-hepatitis liver cirrhosis.  
48  
49 21 *Journal of hepatology* 2000;33(1):38-42.  
50  
51  
52  
53  
54  
55  
56  
57  
58  
59  
60

- 1  
2  
3 1 37. Wannamethee SG, Tchernova J, Whincup P, et al. Plasma leptin: associations with  
4  
5 2 metabolic, inflammatory and haemostatic risk factors for cardiovascular disease.  
6  
7 3 *Atherosclerosis* 2007;191(2):418-26. doi: 10.1016/j.atherosclerosis.2006.04.012  
8  
9  
10 4 38. Balasubramaniyan V, Nalini N. Intraperitoneal leptin regulates lipid metabolism in ethanol  
11  
12 5 supplemented *Mus musculus* heart. *Life sciences* 2006;78(8):831-7. doi:  
13  
14 6 10.1016/j.lfs.2005.05.079  
15  
16  
17 7 39. Splansky GL, Corey D, Yang Q, et al. The Third Generation Cohort of the National Heart,  
18  
19 8 Lung, and Blood Institute's Framingham Heart Study: design, recruitment, and initial  
20  
21 9 examination. *American journal of epidemiology* 2007;165(11):1328-35. doi:  
22  
23 10 10.1093/aje/kwm021  
24  
25  
26 11 40. 1000 Genome imputation based on the November 2010 release 1000 genome imputation  
27  
28 12 general procedure, 2010.  
29  
30  
31 13 41. Auton A, Brooks LD, Durbin RM, et al. A global reference for human genetic variation.  
32  
33 14 *Nature* 2015;526(7571):68-74. doi: 10.1038/nature15393  
34  
35  
36 15 42. Das S, Forer L, Schön herr S, et al. Next-generation genotype imputation service and  
37  
38 16 methods. *Nat Genet* 2016;48(10):1284-7. doi: 10.1038/ng.3656 [published Online First:  
39  
40 17 2016/08/29]  
41  
42  
43 18 43. Andersson C, Lyass A, Larson MG, et al. Low-density-lipoprotein cholesterol concentrations  
44  
45 19 and risk of incident diabetes: epidemiological and genetic insights from the Framingham  
46  
47 20 Heart Study. *Diabetologia* 2015;58(12):2774-80. doi: 10.1007/s00125-015-3762-x  
48  
49  
50 21 44. Rao DC, Sung YJ, Winkler TW, et al. Multiancestry Study of Gene-Lifestyle Interactions for  
51  
52 22 Cardiovascular Traits in 610 475 Individuals From 124 Cohorts: Design and Rationale.  
53  
54 23 *Circ Cardiovasc Genet* 2017;10(3) doi: 10.1161/CIRCGENETICS.116.001649  
55  
56  
57  
58  
59  
60



- 1  
2  
3 1 45. Friedewald WT, Levy RI, Fredrickson DS. Estimation of the concentration of low-density  
4  
5 2 lipoprotein cholesterol in plasma, without use of the preparative ultracentrifuge. *Clinical*  
6  
7 3 *chemistry* 1972;18(6):499-502.  
8  
9  
10 4 46. Kannel WB, Sorlie P. Some health benefits of physical activity. The Framingham Study.  
11  
12 5 *Archives of internal medicine* 1979;139(8):857-61.  
13  
14  
15 6 47. Palmer TM, Sterne JA, Harbord RM, et al. Instrumental variable estimation of causal risk  
16  
17 7 ratios and causal odds ratios in Mendelian randomization analyses. *Am J Epidemiol*  
18  
19 8 2011;173(12):1392-403. doi: 10.1093/aje/kwr026 [published Online First: 2011/05/09]  
20  
21  
22 9 48. Jaleel F, Jaleel A, Rahman MA, et al. Comparison of adiponectin, leptin and blood lipid  
23  
24 10 levels in normal and obese postmenopausal women. *J Pak Med Assoc* 2006;56(9):391-4.  
25  
26 11 49. Kavazarakis E, Moustaki M, Gourgiotis D, et al. Relation of serum leptin levels to lipid  
27  
28 12 profile in healthy children. *Metabolism* 2001;50(9):1091-4. doi:  
29  
30 13 10.1053/meta.2001.25606  
31  
32  
33 14 50. Ayina CN, Noubiap JJ, Etoundi Ngoa LS, et al. Association of serum leptin and adiponectin  
34  
35 15 with anthropomorphic indices of obesity, blood lipids and insulin resistance in a Sub-  
36  
37 16 Saharan African population. *Lipids in health and disease* 2016;15:96. doi:  
38  
39 17 10.1186/s12944-016-0264-x  
40  
41  
42 18 51. Jürimäe T, Jürimäe J, Leppik A, et al. Relationships between adiponectin, leptin, and blood  
43  
44 19 lipids in physically active postmenopausal females. *Am J Hum Biol* 2010;22(5):609-12.  
45  
46 20 doi: 10.1002/ajhb.21052  
47  
48  
49 21 52. Hynes GR, Jones PJ. Leptin and its role in lipid metabolism. *Curr Opin Lipidol*  
50  
51 22 2001;12(3):321-7.  
52  
53  
54  
55  
56  
57  
58  
59  
60

- 1  
2  
3 1 53. Singh P, Peterson TE, Sert-Kuniyoshi FH, et al. Leptin signaling in adipose tissue: role in  
4 lipid accumulation and weight gain. *Circ Res* 2012;111(5):599-603. doi:  
5 2  
6 10.1161/CIRCRESAHA.112.273656 [published Online First: 2012/06/22]  
7 3  
8  
9  
10 4 54. Gao L, Zhou Y, Zhong W, et al. Caveolin-1 is essential for protecting against binge drinking-  
11 induced liver damage through inhibiting reactive nitrogen species. *Hepatology*  
12 5  
13 2014;60(2):687-99. doi: 10.1002/hep.27162 [published Online First: 2014/05/19]  
14 6  
15  
16  
17 7 55. Haghightdoost F, Hariri M. Effect of resveratrol on lipid profile: An updated systematic  
18 review and meta-analysis on randomized clinical trials. *Pharmacol Res* 2018;129:141-50.  
19 8  
20 doi: 10.1016/j.phrs.2017.12.033 [published Online First: 2018/01/02]  
21 9  
22  
23  
24 10 56. Leng E, Xiao Y, Mo Z, et al. Synergistic effect of phytochemicals on cholesterol metabolism  
25 and lipid accumulation in HepG2 cells. *BMC Complement Altern Med* 2018;18(1):122.  
26 11  
27 doi: 10.1186/s12906-018-2189-6 [published Online First: 2018/04/05]  
28 12  
29  
30  
31  
32  
33  
34  
35  
36  
37  
38  
39  
40  
41  
42  
43  
44  
45  
46  
47  
48  
49  
50  
51  
52  
53  
54  
55  
56  
57  
58  
59  
60

1  
2  
3  
4  
5  
6  
7  
8  
9  
10  
11  
12  
13  
14  
15  
16  
17  
18  
19  
20  
21  
22  
23  
24  
25  
26  
27  
28  
29  
30  
31  
32  
33  
34  
35  
36  
37  
38  
39  
40  
41  
42  
43  
44  
45  
46  
47  
48  
49  
50  
51  
52  
53  
54  
55  
56  
57  
58  
59  
60

**Figure legends**

**Figure 1.** The relationship between leptin, genetic risk score for leptin and triglycerides (TG) in Framingham Heart Study the 3<sup>rd</sup> Generation cohort.

For peer review only

**Table 1. Characteristics of the Study Participants by Genetic Risk Score 1 (GRS1)<sup>a</sup> for logarithmically transformed Leptin in Framingham Heart Study 3<sup>rd</sup> Generation Cohort.**

| Covariates                                                   | Overall           | Quartiles of the leptin GRS |                   |                   |                   | P       |
|--------------------------------------------------------------|-------------------|-----------------------------|-------------------|-------------------|-------------------|---------|
|                                                              | (n=3,860)         | Q1 (n=964)                  | Q2 (n=961)        | Q3 (n=977)        | Q4 (n=958)        |         |
| Genetic risk score, mean (SD)                                | 0.07 (0.03)       | 0.03(0.02)                  | 0.06 (0.01)       | 0.08 (0.01)       | 0.11 (0.01)       |         |
| Age, years, mean (SD)                                        | 40.2 (8.9)        | 40.5 (8.7)                  | 39.9 (8.8)        | 40.3 (9.1)        | 39.9 (8.8)        | 0.23    |
| Male, N (%)                                                  | 1808 (46.8)       | 453 (47.0)                  | 437 (45.5)        | 460 (47.1)        | 458 (47.8)        | 0.89    |
| Education levels, N (%)                                      |                   |                             |                   |                   |                   |         |
| <i>No more than high school</i>                              | 591 (15.4)        | 141 (14.7)                  | 146 (15.3)        | 157 (16.1)        | 147 (15.4)        |         |
| <i>Some college</i>                                          | 1213 (31.5)       | 306 (31.8)                  | 287 (30.0)        | 313 (32.1)        | 307 (32.3)        | 0.22    |
| <i>Bachelor's degree and above</i>                           | 2041 (53.1)       | 514 (53.5)                  | 524 (54.8)        | 505 (51.8)        | 498 (52.3)        |         |
| Current Smoker, N (%)                                        | 603 (15.6)        | 144 (15.0)                  | 152 (15.8)        | 165 (16.9)        | 142 (14.8)        | 0.53    |
| Current Drinker, N (%)                                       | 3419 (89.1)       | 858 (89.4)                  | 853 (89.1)        | 863 (88.9)        | 845 (89.0)        | 0.32    |
| Physical Activities index score, mean(SD)                    | 37.5 (7.9)        | 37.8 (8.0)                  | 37.3 (8.1)        | 37.4 (7.7)        | 37.4 (7.8)        | 0.51    |
| BMI, kg/m <sup>2</sup> , mean (SD)                           | 26.9 (5.5)        | 26.9 (5.5)                  | 26.7 (5.5)        | 26.9 (5.5)        | 27.1 (5.5)        | 0.94    |
| Waist girth, inches, mean (SD)                               | 36.6 (6.0)        | 36.7 (6.0)                  | 36.3 (5.8)        | 36.7 (5.9)        | 36.8 (6.1)        | 0.70    |
| Treated for Lipids, N (%)                                    | 265 (6.9)         | 80 (8.3)                    | 56 (5.8)          | 66 (6.8)          | 63 (6.6)          | 0.26    |
| Treated for Diabetes, N (%)                                  | 72 (1.9)          | 22 (2.3)                    | 23 (2.4)          | 19 (1.9)          | 8 (0.8)           | 0.03    |
| Low Density Lipoprotein, mg/dL, mean (SD)                    | 111.7 (31.4)      | 112.1 (30.5)                | 111.5 (31.1)      | 111.9 (32.4)      | 111.3 (31.8)      | 0.94    |
| High Density Lipoprotein, mg/dL, mean (SD)                   | 54.3 (16.1)       | 54.1 (15.4)                 | 54.4 (15.9)       | 54.5 (16.2)       | 54.4 (16.7)       | 0.62    |
| Triglycerides, mg/dL, median (IQR)                           | 92.0 (65.0-138.0) | 92.0 (65.0-142.0)           | 96.0 (66.0-140.0) | 92.0 (65.0-137.0) | 90.0 (63.0-134.0) | 0.03*   |
| Total Cholesterol, mg/dL, mean (SD)                          | 188.8 (35.5)      | 189.1 (34.1)                | 188.9 (37.1)      | 189.5 (35.7)      | 187.9 (35.2)      | 0.64    |
| Leptin, ng/dL, median (IQR)                                  | 12.5 (3.5-15.1)   | 6.7 (3.4-14.5)              | 7.2 (3.4-14.8)    | 7.7 (3.7-14.9)    | 7.7 (3.6-16.8)    | 0.02*   |
| Log-leptin, mean (SD)                                        | 2.00 (1.1)        | 1.95 (1.0)                  | 1.98 (1.1)        | 2.00 (1.0)        | 2.06 (1.1)        | 0.02    |
| Age, sex, BMI and waist girth adjusted log-leptin, mean (SD) | 2.0 (1.1)         | 2.0 (1.0)                   | 2.0 (1.1)         | 2.0 (1.0)         | 2.1 (1.1)         | 0.00005 |

BMI=body mass index; Log-leptin=logarithmically transformed leptin; GRS=Genetic Risk Score; SD=standard deviation.

1  
2  
3<sup>a</sup> Genetic risk scores 1(GRS1) for leptin was generated by summing leptin increasing alleles of 3 SNPs adjusted for BMI, weighted by  
4 their corresponding effect sizes reported by Kilpelainen et al.

5  
6 \*Log transformed leptin and triglycerides were used to calculate the *P*-values.  
7  
8  
9  
10  
11  
12  
13  
14  
15  
16  
17  
18  
19  
20  
21  
22  
23  
24  
25  
26  
27  
28  
29  
30  
31  
32  
33  
34  
35  
36  
37  
38  
39  
40  
41  
42  
43  
44  
45  
46  
47

For peer review only

**Table 2. Association of BMI independent Leptin GRS1<sup>a</sup> with Baseline Lipids among Overall, Drinking, and Non-Drinking Participants of the Framingham Heart Study 3<sup>rd</sup> Generation Cohort, Respectively.**

|                          | Age, sex, BMI, waist adjusted model |      | $P_{\text{interaction}}^b$ | Fully adjusted model <sup>c</sup> |       | $P_{\text{interaction}}^d$ |
|--------------------------|-------------------------------------|------|----------------------------|-----------------------------------|-------|----------------------------|
|                          | Beta( SE)                           | $P$  |                            | Beta( SE)                         | $P$   |                            |
| <b>HDL-C</b>             |                                     |      |                            |                                   |       |                            |
| Overall                  | 5.42 (7.10)                         | 0.44 |                            | 7.79 (7.11)                       | 0.27  |                            |
| Not current drinkers     | 20.42 (18.29)                       | 0.26 | 0.74                       | 22.22 (18.76)                     | 0.24  | 0.71                       |
| Current drinkers         | 6.00 (7.61)                         | 0.43 |                            | 7.02 (7.64)                       | 0.36  |                            |
| <b>LDL-C</b>             |                                     |      |                            |                                   |       |                            |
| Overall                  | -0.11 (16.09)                       | 0.99 |                            | -1.09 (16.24)                     | 0.95  |                            |
| Not current drinkers     | 3.37 (48.63)                        | 0.94 | 0.79                       | -4.18 (50.10)                     | 0.93  | 0.93                       |
| Current drinkers         | -0.14 (17.10)                       | 0.99 |                            | -1.80 (17.18)                     | 0.92  |                            |
| <b>Log-TG</b>            |                                     |      |                            |                                   |       |                            |
| Overall                  | -0.66 (0.26)                        | 0.01 |                            | -0.69 (0.26)                      | 0.008 |                            |
| Not current drinkers     | -1.41 (0.80)                        | 0.08 | 0.31                       | -1.32 (0.82)                      | 0.11  | 0.32                       |
| Current drinkers         | -0.58 (0.27)                        | 0.04 |                            | -0.61 (0.27)                      | 0.03  |                            |
| <b>Total cholesterol</b> |                                     |      |                            |                                   |       |                            |
| Overall                  | -12.50 (18.21)                      | 0.49 |                            | -12.58 (18.31)                    | 0.49  |                            |
| Not current drinkers     | -15.20 (54.11)                      | 0.78 | 0.96                       | -19.13 (55.66)                    | 0.73  | 0.86                       |
| Current drinkers         | -10.20 (19.37)                      | 0.60 |                            | -11.43 (19.42)                    | 0.56  |                            |

GRS=Genetic Risk Score; HDL-C =High-density lipoprotein cholesterol; LDL-C =Low-density lipoprotein cholesterol; log-TG=logarithmically transformed triglycerides; SE=standard error.

<sup>a</sup> Genetic risk scores1 (GRS1) for leptin was generated by summing leptin increasing alleles of 3 SNPs adjusted for body mass index (BMI), weighted by their corresponding effect sizes reported by Kilpelainen et al;

<sup>b</sup> Assessed by adding an interaction term, drinking×GRS along with the drinking variable to the age, sex, BMI and waist adjusted model among the overall participants;

<sup>c</sup> Adjusted for age, sex, education, smoking, drinking, BMI, waist, and physical activity among the overall sample;

<sup>d</sup> Assessed by adding an interaction term, drinking×GRS to the fully adjusted model among the overall participants.

**Table 3. Association of BMI dependent Leptin GRS<sup>2a</sup> with Baseline Lipids among Overall, Drinking, and Non-Drinking Participants of the Framingham Heart Study 3<sup>rd</sup> Generation Cohort, Respectively.**

|                          | Age, sex, BMI, waist adjusted model |       | $P_{\text{interaction}}^b$ | Fully adjusted model <sup>c</sup> |       | $P_{\text{interaction}}^d$ |
|--------------------------|-------------------------------------|-------|----------------------------|-----------------------------------|-------|----------------------------|
|                          | Beta( SE)                           | $P$   |                            | Beta( SE)                         | $P$   |                            |
| <b>HDL-C</b>             |                                     |       |                            |                                   |       |                            |
| Overall                  | -10.67 (6.20)                       | 0.09  |                            | -10.98 (6.22)                     | 0.08  |                            |
| Not current drinkers     | -0.69 (16.31)                       | 0.97  | 0.56                       | 0.82 (16.55)                      | 0.96  | 0.52                       |
| Current drinkers         | -12.15 (6.64)                       | 0.07  |                            | -11.94 (6.68)                     | 0.07  |                            |
| <b>LDL-C</b>             |                                     |       |                            |                                   |       |                            |
| Overall                  | -2.11 (14.05)                       | 0.88  |                            | -2.81 (14.21)                     | 0.84  |                            |
| Not current drinkers     | -92.51 (43.02)                      | 0.03  | 0.03                       | -101.15 (43.78)                   | 0.02  | 0.02                       |
| Current drinkers         | 9.21 (14.91)                        | 0.54  |                            | 7.89 (15.02)                      | 0.60  |                            |
| <b>log-TG</b>            |                                     |       |                            |                                   |       |                            |
| Overall                  | -0.59 (0.23)                        | 0.009 |                            | -0.59 (0.23)                      | 0.01  |                            |
| Not current drinkers     | -2.07 (0.71)                        | 0.004 | 0.03                       | -2.03 (0.72)                      | 0.005 | 0.03                       |
| Current drinkers         | -0.40 (0.24)                        | 0.09  |                            | -0.42 (0.24)                      | 0.08  |                            |
| <b>Total cholesterol</b> |                                     |       |                            |                                   |       |                            |
| Overall                  | -28.05 (15.91)                      | 0.08  |                            | -28.74 (16.02)                    | 0.07  |                            |
| Not current drinkers     | -144.68 (47.61)                     | 0.003 | 0.02                       | -151.32 (48.37)                   | 0.002 | 0.01                       |
| Current drinkers         | -13.19 (16.90)                      | 0.44  |                            | -14.67 (16.98)                    | 0.39  |                            |

GRS=Genetic Risk Score; HDL-C =High-density lipoprotein cholesterol; LDL-C =Low-density lipoprotein cholesterol; log-TG=logarithmically transformed triglycerides; SE=standard error.

<sup>a</sup> Genetic risk scores<sup>2</sup> (GRS<sup>2</sup>) for leptin was generated by summing leptin increasing alleles of 3 SNPs unadjusted for body mass index (BMI), weighted by their corresponding effect sizes reported by Kilpelainen et al;

<sup>b</sup> Assessed by adding an interaction term, drinking×GRS along with the drinking variable to the age, sex, BMI and waist adjusted model among the overall participants;

<sup>c</sup> Adjusted for age, sex, education, smoking, drinking, BMI, waist, and physical activity among the overall sample;

<sup>d</sup> Assessed by adding an interaction term, drinking×GRS to the fully adjusted model among the overall participants.

1  
2  
3  
4  
5  
6  
7  
8  
9  
10  
11  
12  
13  
14  
15  
16  
17  
18  
19  
20  
21  
22  
23  
24  
25  
26  
27  
28  
29  
30  
31  
32  
33  
34  
35  
36  
37  
38  
39  
40  
41  
42  
43  
44  
45  
46  
47  
48  
49  
50  
51  
52  
53  
54  
55  
56  
57  
58  
59  
60



155x127mm (300 x 300 DPI)



1  
2  
3  
4  
5  
6  
7  
8  
9  
10  
11  
12  
13  
14  
15  
16  
17  
18  
19  
20  
21  
22  
23  
24  
25  
26  
27  
28  
29  
30  
31  
32  
33  
34  
35  
36  
37  
38  
39  
40  
41  
42  
43  
44  
45  
46  
47

**Supplemental Table S1. Basic Information of three SNPs for BMI independent leptin GRS1<sup>a</sup> reaching genome-wide significance ( $P < 5 \times 10^{-8}$ )**

| Chromosome  |            | Coded  | Non-coded | Nearest        |                |         |                   |
|-------------|------------|--------|-----------|----------------|----------------|---------|-------------------|
| Position    | rsID       | Allele | Allele    | R <sup>2</sup> | Function       | Gene    | Population        |
| 2:27742603  | rs780093   | C      | T         | 0.995          | intron variant | GCKR    | European American |
| 7:127860163 | rs10487505 | G      | C         | 0.989          | intron variant | LEP     | European American |
| 20:37333012 | rs6071166  | C      | A         | 0.973          | intergenic     | SLC32A1 | European American |

BMI=body mass index

<sup>a</sup> Genetic risk scores 1 (GRS1) for leptin was generated by summing leptin increasing alleles of 3 SNPs adjusted for body mass index (BMI), weighted by their corresponding effect sizes reported by Kilpelainen et al.

**Supplemental Table S2. Basic Information of three SNPs for BMI dependent leptin GRS2<sup>a</sup> reaching genome-wide significance (P<5×10<sup>-8</sup>)**

| Chromosome  |           | Coded  | Non-coded | Nearest        |                      |       |                   |
|-------------|-----------|--------|-----------|----------------|----------------------|-------|-------------------|
| Position    | rsID      | Allele | Allele    | R <sup>2</sup> | Function             | Gene  | Population        |
| 2:27742603  | rs780093  | C      | T         | 0.995          | intron variant       | GCKR  | European American |
| 3:156798775 | rs900400  | T      | C         | 0.691          | upstream variant 2KB | CCNL1 | European American |
| 16:53813450 | rs8043757 | A      | T         | 0.999          | intron variant       | FTO   | European American |

BMI=body mass index

<sup>a</sup> Genetic risk scores 2 (GRS2) for leptin was generated by summing leptin increasing alleles of 3 SNPs unadjusted for body mass index (BMI), weighted by their corresponding effect sizes reported by Kilpelainen et al.

**Supplemental Table S3. Association of BMI independent Leptin GRS1<sup>a</sup> with Baseline Lipids among Overall, Drinking, and Non-Drinking Participants without treating for Lipids of the Framingham Heart Study 3<sup>rd</sup> Generation Cohort, Respectively.**

|                      | Age, sex, BMI, waist adjusted model |          | <i>P</i> <sub>interaction<sup>b</sup></sub> | Fully adjusted model <sup>c</sup> |          | <i>P</i> <sub>interaction<sup>d</sup></sub> |
|----------------------|-------------------------------------|----------|---------------------------------------------|-----------------------------------|----------|---------------------------------------------|
|                      | Beta( SE)                           | <i>P</i> |                                             | Beta( SE)                         | <i>P</i> |                                             |
| <b>HDL-C</b>         |                                     |          |                                             |                                   |          |                                             |
| Overall              | 5.25 (7.44)                         | 0.48     |                                             | 7.59 (7.47)                       | 0.31     |                                             |
| Not current drinkers | 18.83 (19.59)                       | 0.34     | 0.86                                        | 20.43 (20.23)                     | 0.31     | 0.83                                        |
| Current drinkers     | 6.22 (7.97)                         | 0.44     |                                             | 7.19 (8)                          | 0.37     |                                             |
| <b>LDL-C</b>         |                                     |          |                                             |                                   |          |                                             |
| Overall              | 14.86 (16.06)                       | 0.35     |                                             | 13.43 (16.2)                      | 0.41     |                                             |
| Not current drinkers | 36.1 (49.22)                        | 0.46     | 0.51                                        | 27.18 (50.69)                     | 0.59     | 0.61                                        |
| Current drinkers     | 12.19 (17.05)                       | 0.47     |                                             | 10.48 (17.11)                     | 0.54     |                                             |
| <b>log-TG</b>        |                                     |          |                                             |                                   |          |                                             |
| Overall              | -0.69 (0.27)                        | 0.01     |                                             | -0.72 (0.27)                      | 0.007    |                                             |
| Not current drinkers | -1.72 (0.84)                        | 0.04     | 0.20                                        | -1.61 (0.86)                      | 0.06     | 0.21                                        |
| Current drinkers     | -0.58 (0.28)                        | 0.04     |                                             | -0.6 (0.28)                       | 0.03     |                                             |

## Total cholesterol

|                      |               |      |      |               |      |      |
|----------------------|---------------|------|------|---------------|------|------|
| Overall              | -0.09 (18.19) | 1.00 |      | -0.67 (18.26) | 0.97 |      |
| Not current drinkers | 3.78 (55.05)  | 0.95 | 0.94 | -2.29 (56.42) | 0.97 | 0.97 |
| Current drinkers     | 0.98 (19.29)  | 0.96 |      | -0.34 (19.32) | 0.99 |      |

BMI=body mass index; GRS=Genetic Risk Score; HDL-C=High-density lipoprotein cholesterol; LDL-C=Low-density lipoprotein cholesterol; log-TG=logarithmically transformed triglycerides; SE=standard error

<sup>a</sup> Genetic risk scores 1 (GRS1) for leptin was generated by summing leptin increasing alleles of 3 SNPs adjusted for body mass index (BMI), weighted by their corresponding effect sizes reported by Kilpelainen et al;

<sup>b</sup> Assessed by adding an interaction term, drinking×GRS along with the drinking variable to the age, sex, BMI and waist adjusted model among the overall participants;

<sup>c</sup> Adjusted for age, sex, education, smoking, drinking, BMI, waist, and physical activity among the overall sample;

<sup>d</sup> Assessed by adding an interaction term, drinking×GRS to the fully adjusted model among the overall participants.

**Supplemental Table S4. Association of BMI dependent Leptin GRS2<sup>a</sup> with Baseline Lipids among Overall, Drinking, and Non-Drinking Participants without treating for Lipids of the Framingham Heart Study 3<sup>rd</sup> Generation Cohort, Respectively.**

|                          | Age, sex, BMI, waist adjusted model |          |                                              | Fully adjusted model <sup>c</sup> |          |                                              |
|--------------------------|-------------------------------------|----------|----------------------------------------------|-----------------------------------|----------|----------------------------------------------|
|                          | Beta( SE)                           | <i>P</i> | <i>P</i> <sub>interaction</sub> <sup>b</sup> | Beta( SE)                         | <i>P</i> | <i>P</i> <sub>interaction</sub> <sup>d</sup> |
| <b>HDL-C</b>             |                                     |          |                                              |                                   |          |                                              |
| Overall                  | -9.73 (6.50)                        | 0.13     |                                              | -9.66 (6.53)                      | 0.14     |                                              |
| Not current drinkers     | -2.61 (17.44)                       | 0.88     | 0.72                                         | -1.22 (17.77)                     | 0.95     | 0.68                                         |
| Current drinkers         | -10.52 (6.94)                       | 0.13     |                                              | -10.19 (6.99)                     | 0.15     |                                              |
| <b>LDL-C</b>             |                                     |          |                                              |                                   |          |                                              |
| Overall                  | -0.42 (14.02)                       | 0.98     |                                              | -1.56 (14.17)                     | 0.91     |                                              |
| Not current drinkers     | -83.19 (43.58)                      | 0.06     | 0.07                                         | -94.12 (44.22)                    | 0.03     | 0.05                                         |
| Current drinkers         | 9.71 (14.86)                        | 0.51     |                                              | 7.61 (14.96)                      | 0.61     |                                              |
| <b>log-TG</b>            |                                     |          |                                              |                                   |          |                                              |
| Overall                  | -0.63 (0.23)                        | 0.007    |                                              | -0.63 (0.23)                      | 0.007    |                                              |
| Not current drinkers     | -2.09 (0.74)                        | 0.005    | 0.04                                         | -2.00 (0.75)                      | 0.008    | 0.05                                         |
| Current drinkers         | -0.45 (0.25)                        | 0.07     |                                              | -0.47 (0.25)                      | 0.05     |                                              |
| <b>Total cholesterol</b> |                                     |          |                                              |                                   |          |                                              |

|                      |                 |       |      |                 |       |      |
|----------------------|-----------------|-------|------|-----------------|-------|------|
| Overall              | -25.28 (15.87)  | 0.11  |      | -26.38 (15.97)  | 0.10  |      |
| Not current drinkers | -136.15 (48.44) | 0.005 | 0.03 | -144.29 (48.92) | 0.003 | 0.02 |
| Current drinkers     | -10.96 (16.82)  | 0.51  |      | -13.64 (16.90)  | 0.42  |      |

BMI=body mass index; GRS=Genetic Risk Score; HDL-C=High-density lipoprotein cholesterol; LDL-C=Low-density lipoprotein cholesterol; log-TG=logarithmically transformed triglycerides; SE=standard error

<sup>a</sup> Genetic risk scores 2 (GRS2) for leptin was generated by summing leptin increasing alleles of 3 SNPs unadjusted for body mass index (BMI), weighted by their corresponding effect sizes reported by Kilpelainen et al;

<sup>b</sup> Assessed by adding an interaction term, drinking×GRS along with the drinking variable to the age, sex, BMI and waist adjusted model among the overall participants;

<sup>c</sup> Adjusted for age, sex, education, smoking, drinking, BMI, waist, and physical activity among the overall sample;

<sup>d</sup> Assessed by adding an interaction term, drinking×GRS to the fully adjusted model among the overall participants.

**Supplemental Table S5. Association of BMI independent Leptin GRS1<sup>a</sup> with Baseline Lipids among Overall, Drinking, and Non-Drinking Participants without treating for Lipids and Diabetes of the Framingham Heart Study 3<sup>rd</sup> Generation Cohort, Respectively.**

|                      | Age, sex, BMI, waist adjusted model |          |                                              | Fully adjusted model <sup>c</sup> |          |                                              |
|----------------------|-------------------------------------|----------|----------------------------------------------|-----------------------------------|----------|----------------------------------------------|
|                      | Beta( SE)                           | <i>P</i> | <i>P</i> <sub>interaction</sub> <sup>b</sup> | Beta( SE)                         | <i>P</i> | <i>P</i> <sub>interaction</sub> <sup>d</sup> |
| <b>HDL-C</b>         |                                     |          |                                              |                                   |          |                                              |
| Overall              | 5.64 (7.47)                         | 0.45     |                                              | 8.00 (7.49)                       | 0.29     |                                              |
| Not current drinkers | 20.89 (19.62)                       | 0.29     | 0.72                                         | 22.51 (20.25)                     | 0.27     | 0.69                                         |
| Current drinkers     | 6.22 (7.98)                         | 0.44     |                                              | 7.17 (8.02)                       | 0.37     |                                              |
| <b>LDL-C</b>         |                                     |          |                                              |                                   |          |                                              |
| Overall              | 15.29 (16.11)                       | 0.34     |                                              | 13.42 (16.27)                     | 0.41     |                                              |
| Not current drinkers | 33.51 (49.77)                       | 0.50     | 0.58                                         | 24.63 (51.26)                     | 0.63     | 0.68                                         |
| Current drinkers     | 12.68 (17.09)                       | 0.46     |                                              | 10.99 (17.16)                     | 0.52     |                                              |
| <b>log-TG</b>        |                                     |          |                                              |                                   |          |                                              |
| Overall              | -0.66 (0.27)                        | 0.01     |                                              | -0.69 (0.27)                      | 0.01     |                                              |
| Not current drinkers | -1.60 (0.85)                        | 0.06     | 0.23                                         | -1.46 (0.86)                      | 0.09     | 0.25                                         |
| Current drinkers     | -0.57 (0.28)                        | 0.04     |                                              | -0.59 (0.28)                      | 0.04     |                                              |

## Total cholesterol

|                      |              |      |      |              |      |      |
|----------------------|--------------|------|------|--------------|------|------|
| Overall              | 1.17 (18.24) | 0.95 |      | 0.14 (18.33) | 0.99 |      |
| Not current drinkers | 6.19 (55.64) | 0.91 | 0.93 | 1.04 (57.03) | 0.99 | 0.99 |
| Current drinkers     | 1.56 (19.35) | 0.94 |      | 0.26 (19.38) | 0.99 |      |

---

BMI=body mass index; GRS=Genetic Risk Score; HDL-C =High-density lipoprotein cholesterol; LDL-C =Low-density lipoprotein cholesterol; log-TG=logarithmically transformed triglycerides; SE=standard error

<sup>a</sup> Genetic risk scores 1 (GRS1) for leptin was generated by summing leptin increasing alleles of 3 SNPs adjusted for body mass index (BMI), weighted by their corresponding effect sizes reported by Kilpelainen et al;

<sup>b</sup> Assessed by adding an interaction term, drinking×GRS along with the drinking variable to the age, sex, BMI and waist adjusted model among the overall participants;

<sup>c</sup> Adjusted for age, sex, education, smoking, drinking, BMI, waist, and physical activity among the overall sample;

<sup>d</sup> Assessed by adding an interaction term, drinking×GRS to the fully adjusted model among the overall participants.



**Supplemental Table S6. Association of BMI dependent Leptin GRS2<sup>a</sup> with Baseline Lipids among Overall, Drinking, and Non-Drinking Participants without treating for Lipids and Diabetes of the Framingham Heart Study 3<sup>rd</sup> Generation Cohort, respectively.**

|                      | Age, sex, BMI, waist adjusted model |          | <i>P</i> <sub>interaction<sup>b</sup></sub> | Fully adjusted model <sup>c</sup> |          | <i>P</i> <sub>interaction<sup>d</sup></sub> |
|----------------------|-------------------------------------|----------|---------------------------------------------|-----------------------------------|----------|---------------------------------------------|
|                      | Beta( SE)                           | <i>P</i> |                                             | Beta( SE)                         | <i>P</i> |                                             |
| <b>HDL-C</b>         |                                     |          |                                             |                                   |          |                                             |
| Overall              | -10.39 (6.52)                       | 0.11     |                                             | -10.48 (6.55)                     | 0.11     |                                             |
| Not current drinkers | -8.18 (17.54)                       | 0.64     | 0.95                                        | -7.77 (17.87)                     | 0.66     | 0.92                                        |
| Current drinkers     | -10.58 (6.96)                       | 0.13     |                                             | -10.32 (7.01)                     | 0.14     |                                             |
| <b>LDL-C</b>         |                                     |          |                                             |                                   |          |                                             |
| Overall              | -1.58 (14.07)                       | 0.91     |                                             | -3.3 (14.22)                      | 0.82     |                                             |
| Not current drinkers | -95.04 (44.19)                      | 0.03     | 0.04                                        | -105.66 (44.81)                   | 0.02     | 0.03                                        |
| Current drinkers     | 8.84 (14.90)                        | 0.55     |                                             | 6.84 (15.00)                      | 0.65     |                                             |
| <b>log-TG</b>        |                                     |          |                                             |                                   |          |                                             |
| Overall              | -0.62 (0.23)                        | 0.008    |                                             | -0.62 (0.23)                      | 0.008    |                                             |
| Not current drinkers | -2.00 (0.75)                        | 0.008    | 0.06                                        | -1.87 (0.76)                      | 0.01     | 0.08                                        |

|    |                      |                 |       |      |                 |       |      |
|----|----------------------|-----------------|-------|------|-----------------|-------|------|
| 1  |                      |                 |       |      |                 |       |      |
| 2  |                      |                 |       |      |                 |       |      |
| 3  | Current drinkers     | -0.45 (0.25)    | 0.07  |      | -0.48 (0.25)    | 0.05  |      |
| 4  |                      |                 |       |      |                 |       |      |
| 5  | Total cholesterol    |                 |       |      |                 |       |      |
| 6  |                      |                 |       |      |                 |       |      |
| 7  | Overall              | -26.72 (15.92)  | 0.09  |      | -28.67 (16.03)  | 0.07  |      |
| 8  |                      |                 |       |      |                 |       |      |
| 9  | Not current drinkers | -150.52 (49.04) | 0.002 | 0.01 | -158.43 (49.51) | 0.002 | 0.01 |
| 10 |                      |                 |       |      |                 |       |      |
| 11 | Current drinkers     | -12.06 (16.87)  | 0.47  |      | -14.69 (16.95)  | 0.39  |      |
| 12 |                      |                 |       |      |                 |       |      |
| 13 |                      |                 |       |      |                 |       |      |
| 14 |                      |                 |       |      |                 |       |      |

BMI=body mass index; GRS=Genetic Risk Score; HDL-C=High-density lipoprotein cholesterol; LDL-C=Low-density lipoprotein cholesterol; log-TG=logarithmically transformed triglycerides; SE=standard error

<sup>a</sup> Genetic risk scores 2 (GRS2) for leptin was generated by summing leptin increasing alleles of 3 SNPs unadjusted for body mass index (BMI), weighted by their corresponding effect sizes reported by Kilpelainen et al;

<sup>b</sup> Assessed by adding an interaction term, drinking×GRS along with the drinking variable to the age, sex, BMI and waist adjusted model among the overall participants;

<sup>c</sup> Adjusted for age, sex, education, smoking, drinking, BMI, waist, and physical activity among the overall sample;

<sup>d</sup> Assessed by adding an interaction term, drinking×GRS to the fully adjusted model among the overall participants.

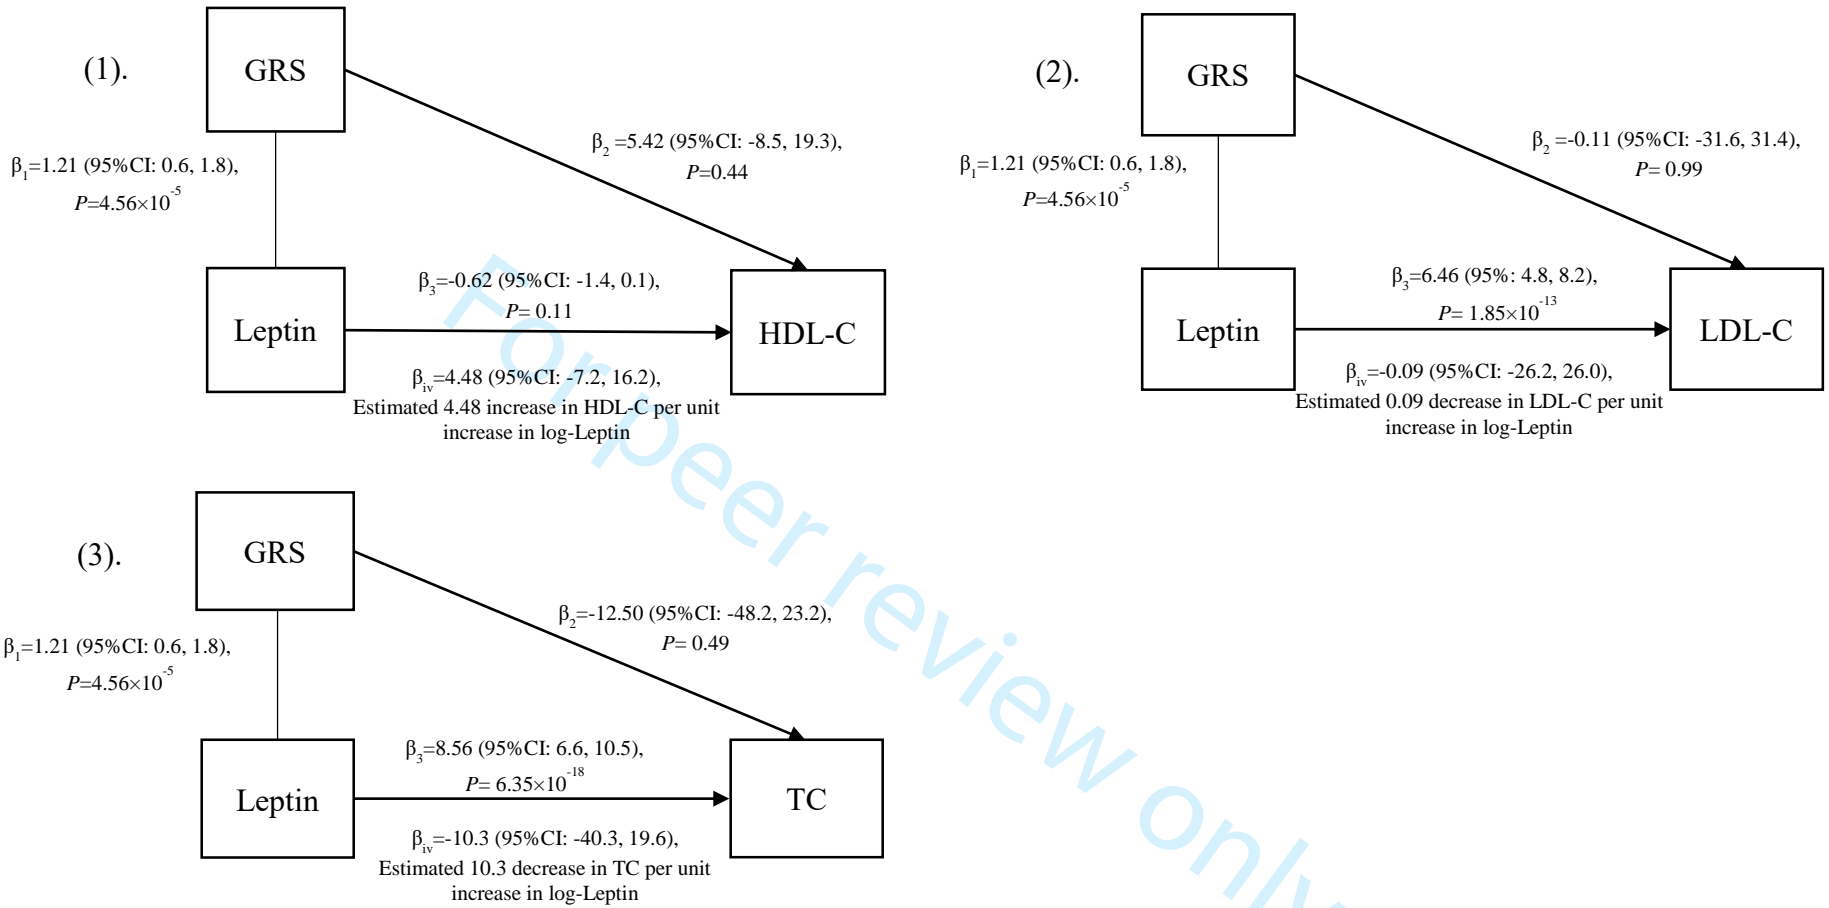

**Supplemental Figure S1. The relationship between Leptin, Genetic Risk Score 1 (GRS1) for Leptin and Lipids in Framingham Heart Study the 3<sup>rd</sup> Generation cohort.**

1. The relationship between leptin, genetic risk score for leptin and high density lipoprotein cholesterol (HDL-C)
2. The relationship between leptin, genetic risk score for leptin and low density lipoprotein cholesterol (LDL-C)
3. The relationship between leptin, genetic risk score for leptin and total cholesterol (TC)

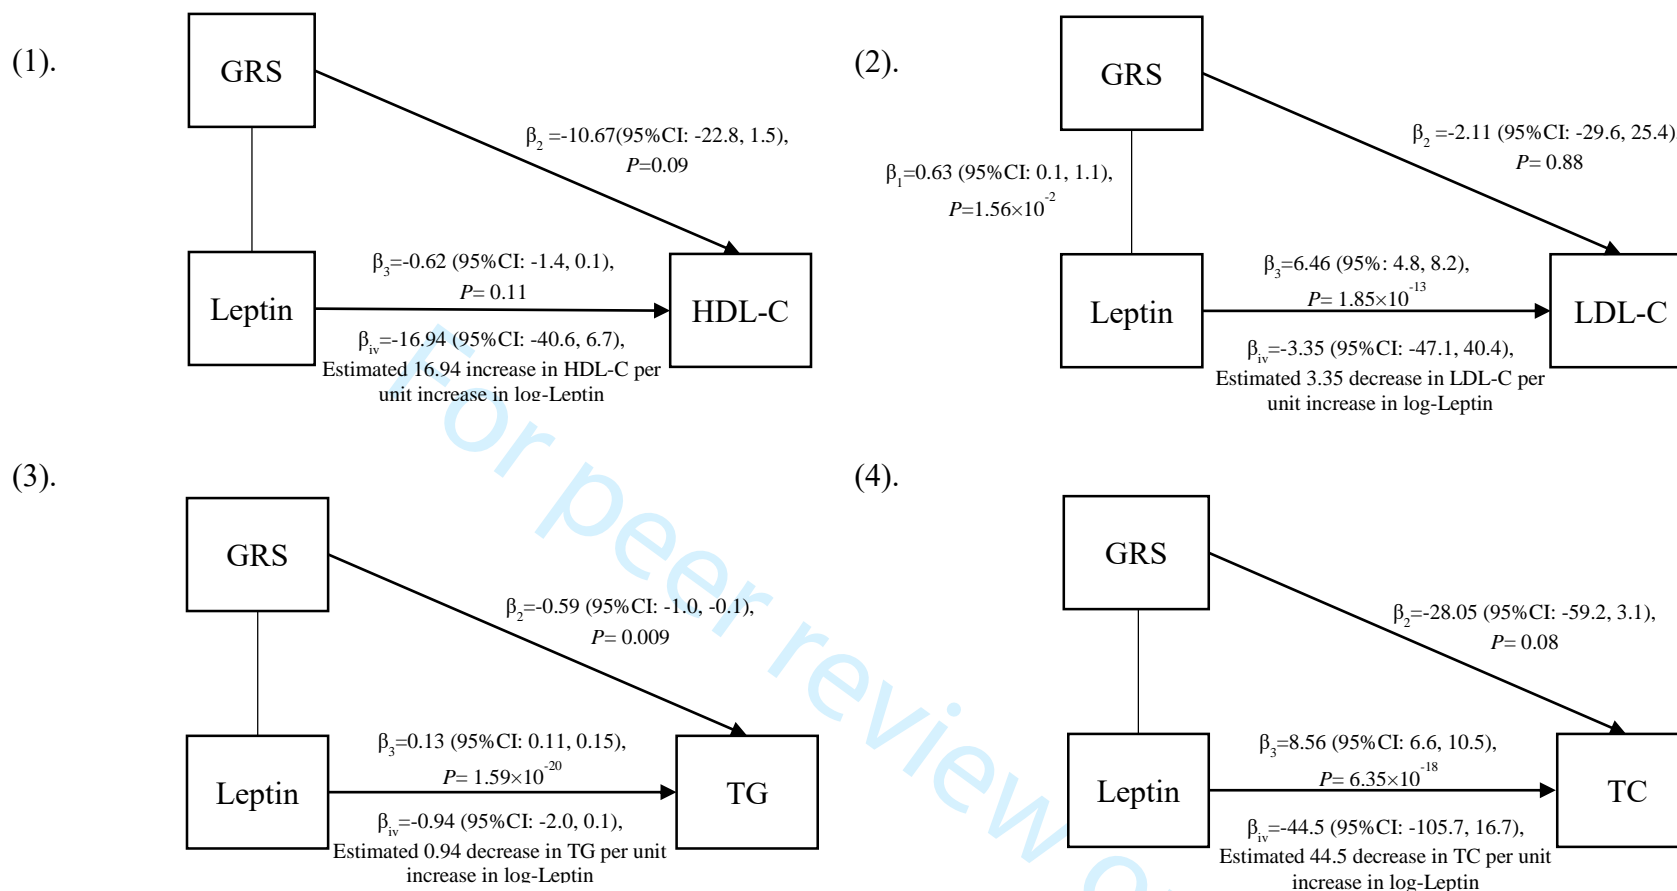

32 **Supplemental Figure S2. The relationship between Leptin, Genetic Risk Score 2 (GRS2) for Leptin and Lipids in Framingham**  
33 **Heart Study the 3<sup>rd</sup> Generation cohort.**

- 34  
35
- 36 1. The relationship between leptin, genetic risk score for leptin and high density lipoprotein cholesterol (HDL-C)
  - 37 2. The relationship between leptin, genetic risk score for leptin and low density lipoprotein cholesterol (LDL-C)
  - 38 3. The relationship between leptin, genetic risk score for leptin and triglycerides (TG)
- 39  
40  
41  
42  
43  
44

1  
2  
3  
4  
5  
6  
7  
8  
9  
10  
11  
12  
13  
14  
15  
16  
17  
18  
19  
20  
21  
22  
23  
24  
25  
26  
27  
28  
29  
30  
31  
32  
33  
34  
35  
36  
37  
38  
39  
40  
41  
42  
43  
44  
45  
46  
47

4. The relationship between leptin, genetic risk score for leptin and total cholesterol (TC)

For peer review only

# Reporting checklist for genetic association study.

Based on the STREGA guidelines.

## Instructions to authors

Complete this checklist by entering the page numbers from your manuscript where readers will find each of the items listed below.

Your article may not currently address all the items on the checklist. Please modify your text to include the missing information. If you are certain that an item does not apply, please write "n/a" and provide a short explanation.

Upload your completed checklist as an extra file when you submit to a journal.

In your methods section, say that you used the STREGA reporting guidelines, and cite them as:

Little J, Higgins JP, Ioannidis JP, Moher D, Gagnon F, von Elm E, Khoury MJ, Cohen B, Davey-Smith G, Grimshaw J, Scheet P, Gwinn M, Williamson RE, Zou GY, Hutchings K, Johnson CY, Tait V, Wiens M, Golding J, van Duijn C, McLaughlin J, Paterson A, Wells G, Fortier I, Freedman M, Zecevic M, King R, Infante-Rivard C, Stewart A, Birkett N; STrengthening the REporting of Genetic Association Studies. STrengthening the REporting of Genetic Association Studies (STREGA): An Extension of the STROBE Statement.

|          |     | Reporting Item                                                                                                                                                    | Page Number |
|----------|-----|-------------------------------------------------------------------------------------------------------------------------------------------------------------------|-------------|
| Title    | #1a | Indicate the study's design with a commonly used term in the title or the abstract                                                                                | 1           |
| Abstract | #1b | Provide in the abstract an informative and balanced summary of what was done and what was found                                                                   | 2           |
|          | #2  | Explain the scientific background and rationale for the investigation being reported                                                                              | 4           |
|          | #3  | State specific objectives, including any prespecified hypotheses. State if the study is the first report of a genetic association, a replication effort, or both. | 5           |
|          | #4  | Present key elements of study design early in the paper                                                                                                           | 5           |
|          | #5  | Describe the setting, locations, and relevant dates, including periods of recruitment, exposure, follow-up, and data collection                                   | 5-6         |

|    |      |                                                                                                                                            |     |
|----|------|--------------------------------------------------------------------------------------------------------------------------------------------|-----|
| 1  | #6a  | Cohort study – Give the eligibility criteria, and the sources and methods                                                                  | 5-6 |
| 2  |      | of selection of participants. Describe methods of follow-up. Case-control                                                                  |     |
| 3  |      | study – Give the eligibility criteria, and the sources and methods of case                                                                 |     |
| 4  |      | ascertainment and control selection. Give the rationale for the choice of                                                                  |     |
| 5  |      | cases and controls. Cross-sectional study – Give the eligibility criteria,                                                                 |     |
| 6  |      | and the sources and methods of selection of participants. Give                                                                             |     |
| 7  |      | information on the criteria and methods for selection of subsets of                                                                        |     |
| 8  |      | participants from a larger study, when relevant.                                                                                           |     |
| 9  |      |                                                                                                                                            |     |
| 10 |      |                                                                                                                                            |     |
| 11 |      |                                                                                                                                            |     |
| 12 |      |                                                                                                                                            |     |
| 13 |      |                                                                                                                                            |     |
| 14 | #6b  | Cohort study – For matched studies, give matching criteria and number                                                                      | n/a |
| 15 |      | of exposed and unexposed. Case-control study – For matched studies,                                                                        |     |
| 16 |      | give matching criteria and the number of controls per case.                                                                                |     |
| 17 |      |                                                                                                                                            |     |
| 18 |      |                                                                                                                                            |     |
| 19 | #7a  | Clearly define all outcomes, exposures, predictors, potential                                                                              | 7-8 |
| 20 |      | confounders, and effect modifiers. Give diagnostic criteria, if applicable                                                                 |     |
| 21 |      |                                                                                                                                            |     |
| 22 |      |                                                                                                                                            |     |
| 23 | #7b  | Clearly define genetic exposures (genetic variants) using a widely-used                                                                    | 6-7 |
| 24 |      | nomenclature system. Identify variables likely to be associated with                                                                       |     |
| 25 |      | population stratification (confounding by ethnic origin).                                                                                  |     |
| 26 |      |                                                                                                                                            |     |
| 27 |      |                                                                                                                                            |     |
| 28 | #8a  | For each variable of interest give sources of data and details of methods                                                                  | 5-6 |
| 29 |      | of assessment (measurement). Describe comparability of assessment                                                                          |     |
| 30 |      | methods if there is more than one group. Give information separately for                                                                   |     |
| 31 |      | for exposed and unexposed groups if applicable.                                                                                            |     |
| 32 |      |                                                                                                                                            |     |
| 33 |      |                                                                                                                                            |     |
| 34 |      |                                                                                                                                            |     |
| 35 | #8b  | Describe laboratory methods, including source and storage of DNA,                                                                          | 6-7 |
| 36 |      | genotyping methods and platforms (including the allele calling algorithm                                                                   |     |
| 37 |      | used, and its version), error rates and call rates. State the laboratory /                                                                 |     |
| 38 |      | centre where genotyping was done. Describe comparability of laboratory                                                                     |     |
| 39 |      | methods if there is more than one group. Specify whether genotypes                                                                         |     |
| 40 |      | were assigned using all of the data from the study simultaneously or in                                                                    |     |
| 41 |      | smaller batches.                                                                                                                           |     |
| 42 |      |                                                                                                                                            |     |
| 43 |      |                                                                                                                                            |     |
| 44 |      |                                                                                                                                            |     |
| 45 |      |                                                                                                                                            |     |
| 46 | #9a  | Describe any efforts to address potential sources of bias                                                                                  | 8-9 |
| 47 |      |                                                                                                                                            |     |
| 48 | #9b  | Describe any efforts to address potential sources of bias                                                                                  | 8-9 |
| 49 |      |                                                                                                                                            |     |
| 50 |      |                                                                                                                                            |     |
| 51 | #10  | Explain how the study size was arrived at                                                                                                  | 5-6 |
| 52 |      |                                                                                                                                            |     |
| 53 | #11  | Explain how quantitative variables were handled in the analyses. If                                                                        | 6   |
| 54 |      | applicable, describe which groupings were chosen, and why. If                                                                              |     |
| 55 |      | applicable, describe how effects of treatment were dealt with.                                                                             |     |
| 56 |      |                                                                                                                                            |     |
| 57 |      |                                                                                                                                            |     |
| 58 |      |                                                                                                                                            |     |
| 59 | #12a | Describe all statistical methods, including those used to control for                                                                      | 8-9 |
| 60 |      | For peer review only - <a href="http://bmjopen.bmj.com/site/about/guidelines.xhtml">http://bmjopen.bmj.com/site/about/guidelines.xhtml</a> |     |

|    |                                                                                 |      |
|----|---------------------------------------------------------------------------------|------|
| 1  | confounding. State software version used and options (or settings)              |      |
| 2  | chosen.                                                                         |      |
| 3  |                                                                                 |      |
| 4  | #12b Describe any methods used to examine subgroups and interactions            | 9    |
| 5  |                                                                                 |      |
| 6  | #12c Explain how missing data were addressed                                    | 9    |
| 7  |                                                                                 |      |
| 8  | #12d If applicable, explain how loss to follow-up was addressed                 | n/a  |
| 9  |                                                                                 |      |
| 10 |                                                                                 |      |
| 11 | #12e Describe any sensitivity analyses                                          | 9    |
| 12 |                                                                                 |      |
| 13 | #12f State whether Hardy-Weinberg equilibrium was considered and, if so,        | 7    |
| 14 | how.                                                                            |      |
| 15 |                                                                                 |      |
| 16 |                                                                                 |      |
| 17 | #12g Describe any methods used for inferring genotypes or haplotypes            | 7    |
| 18 |                                                                                 |      |
| 19 | #12h Describe any methods used to assess or address population                  | 7    |
| 20 | stratification.                                                                 |      |
| 21 |                                                                                 |      |
| 22 |                                                                                 |      |
| 23 | #12i Describe any methods used to address multiple comparisons or to            | 7    |
| 24 | control risk of false positive findings.                                        |      |
| 25 |                                                                                 |      |
| 26 |                                                                                 |      |
| 27 | #12j Describe any methods used to address and correct for relatedness           | n/a  |
| 28 | among subjects                                                                  |      |
| 29 |                                                                                 |      |
| 30 |                                                                                 |      |
| 31 | #13a Report numbers of individuals at each stage of study—eg numbers            | 5-6  |
| 32 | potentially eligible, examined for eligibility, confirmed eligible, included in |      |
| 33 | the study, completing follow-up, and analysed. Give information                 |      |
| 34 | separately for for exposed and unexposed groups if applicable. Report           |      |
| 35 | numbers of individuals in whom genotyping was attempted and numbers             |      |
| 36 | of individuals in whom genotyping was successful.                               |      |
| 37 |                                                                                 |      |
| 38 |                                                                                 |      |
| 39 |                                                                                 |      |
| 40 |                                                                                 |      |
| 41 | #13b Give reasons for non-participation at each stage                           | n/a  |
| 42 |                                                                                 |      |
| 43 | #13c Consider use of a flow diagram                                             | n/a  |
| 44 |                                                                                 |      |
| 45 | #14a Give characteristics of study participants (eg demographic, clinical,      | 9-10 |
| 46 | social) and information on exposures and potential confounders. Give            |      |
| 47 | information separately for exposed and unexposed groups if applicable.          |      |
| 48 | Consider giving information by genotype                                         |      |
| 49 |                                                                                 |      |
| 50 |                                                                                 |      |
| 51 |                                                                                 |      |
| 52 | #14b Indicate number of participants with missing data for each variable of     | 9-10 |
| 53 | interest                                                                        |      |
| 54 |                                                                                 |      |
| 55 |                                                                                 |      |
| 56 | #14c Cohort study – Summarize follow-up time, e.g. average and total            | n/a  |
| 57 | amount.                                                                         |      |
| 58 |                                                                                 |      |
| 59 |                                                                                 |      |
| 60 |                                                                                 |      |



- 1 #15 Cohort study Report numbers of outcome events or summary measures 9/10  
 2 over time. Give information separately for exposed and unexposed  
 3 groups if applicable. Report outcomes (phenotypes) for each genotype  
 4 category over time Case-control study – Report numbers in each  
 5 exposure category, or summary measures of exposure. Give information  
 6 separately for cases and controls . Report numbers in each genotype  
 7 category. Cross-sectional study – Report numbers of outcome events or  
 8 summary measures. Give information separately for exposed and  
 9 unexposed groups if applicable. Report outcomes (phenotypes) for each  
 10 genotype category  
 11  
 12  
 13  
 14  
 15  
 16  
 17 #16a Give unadjusted estimates and, if applicable, confounder-adjusted 10-11  
 18 estimates and their precision (eg, 95% confidence interval). Make clear  
 19 which confounders were adjusted for and why they were included  
 20  
 21  
 22 #16b Report category boundaries when continuous variables were categorized 10-11  
 23  
 24 #16c If relevant, consider translating estimates of relative risk into absolute 10-11  
 25 risk for a meaningful time period  
 26  
 27  
 28 #16d Report results of any adjustments for multiple comparisons 10-11  
 29  
 30 #17a Report other analyses done—e.g., analyses of subgroups and 10-11  
 31 interactions, and sensitivity analyses  
 32  
 33 #17b Report other analyses done—e.g., analyses of subgroups and 10-11  
 34 interactions, and sensitivity analyses  
 35  
 36 #17c Report other analyses done—e.g., analyses of subgroups and 10-11  
 37 interactions, and sensitivity analyses  
 38  
 39  
 40 #18 Summarise key results with reference to study objectives 11-13  
 41  
 42  
 43 #19 Discuss limitations of the study, taking into account sources of potential 13-14  
 44 bias or imprecision. Discuss both direction and magnitude of any  
 45 potential bias.  
 46  
 47  
 48 #20 Give a cautious overall interpretation considering objectives, limitations, 14  
 49 multiplicity of analyses, results from similar studies, and other relevant  
 50 evidence.  
 51  
 52  
 53 #21 Discuss the generalisability (external validity) of the study results 14  
 54  
 55  
 56 #22 Give the source of funding and the role of the funders for the present 15  
 57  
 58  
 59

1 study and, if applicable, for the original study on which the present article  
2 is based  
3

4 The STREGA checklist is distributed under the terms of the Creative Commons Attribution License  
5 CC-BY. This checklist was completed on 22. September 2018 using <http://www.goodreports.org/>, a  
6 tool made by the [EQUATOR Network](#) in collaboration with [Penelope.ai](#)  
7  
8  
9  
10  
11  
12  
13  
14  
15  
16  
17  
18  
19  
20  
21  
22  
23  
24  
25  
26  
27  
28  
29  
30  
31  
32  
33  
34  
35  
36  
37  
38  
39  
40  
41  
42  
43  
44  
45  
46  
47  
48  
49  
50  
51  
52  
53  
54  
55  
56  
57  
58  
59  
60
