# Supplementary material for: Association between genetically determined leptin and blood lipids considering alcohol consumption: a Mendelian randomisation study
Source: PubMed Central journal article supplement — BMJ Open. 2019 Nov 7;9(11):e026860. doi: 10.1136/bmjopen-2018-026860 (PMC6858149; doi:10.1136/bmjopen-2018-026860), 2019-11-07
Supplement: bmjopen-2018-026860supp001.pdf [file bmjopen-2018-026860supp001.pdf]

**Supplemental Table S1. Basic Information of three SNPs for BMI independent leptin GRS1<sup>a</sup> reaching genome-wide significance ( $P < 5 \times 10^{-8}$ )**

| <b>Chromosome</b> |             | <b>Coded</b>  | <b>Non-coded</b> |                      |                 | <b>Nearest</b> |                   |
|-------------------|-------------|---------------|------------------|----------------------|-----------------|----------------|-------------------|
| <b>Position</b>   | <b>rsID</b> | <b>Allele</b> | <b>Allele</b>    | <b>R<sup>2</sup></b> | <b>Function</b> | <b>Gene</b>    | <b>Population</b> |
| 2:27742603        | rs780093    | C             | T                | 0.995                | intron variant  | GCKR           | European American |
| 7:127860163       | rs10487505  | G             | C                | 0.989                | intron variant  | LEP            | European American |
| 20:37333012       | rs6071166   | C             | A                | 0.973                | intergenic      | SLC32A1        | European American |

BMI=body mass index

<sup>a</sup> Genetic risk scores 1 (GRS1) for leptin was generated by summing leptin increasing alleles of 3 SNPs adjusted for body mass index (BMI), weighted by their corresponding effect sizes reported by Kilpelainen et al.

**Supplemental Table S2. Basic Information of three SNPs for BMI dependent leptin GRS2<sup>a</sup> reaching genome-wide significance (P<5×10<sup>-8</sup>)**

| Chromosome  |           | Coded  | Non-coded |                |                      | Nearest |                   |
|-------------|-----------|--------|-----------|----------------|----------------------|---------|-------------------|
| Position    | rsID      | Allele | Allele    | R <sup>2</sup> | Function             | Gene    | Population        |
| 2:27742603  | rs780093  | C      | T         | 0.995          | intron variant       | GCKR    | European American |
| 3:156798775 | rs900400  | T      | C         | 0.691          | upstream variant 2KB | CCNL1   | European American |
| 16:53813450 | rs8043757 | A      | T         | 0.999          | intron variant       | FTO     | European American |

BMI=body mass index

<sup>a</sup> Genetic risk scores 2 (GRS2) for leptin was generated by summing leptin increasing alleles of 3 SNPs unadjusted for body mass index (BMI), weighted by their corresponding effect sizes reported by Kilpelainen et al.

**Supplemental Table S3. Association of BMI independent Leptin GRS1<sup>a</sup> with Baseline Lipids among Overall, Drinking, and Non-Drinking Participants without treating for Lipids of the Framingham Heart Study 3<sup>rd</sup> Generation Cohort, Respectively.**

|                      | Age, sex, BMI, waist adjusted model |      | $P_{\text{interaction}}^b$ | Fully adjusted model <sup>c</sup> |       | $P_{\text{interaction}}^d$ |
|----------------------|-------------------------------------|------|----------------------------|-----------------------------------|-------|----------------------------|
|                      | Beta( SE)                           | $P$  |                            | Beta( SE)                         | $P$   |                            |
| <b>HDL-C</b>         |                                     |      |                            |                                   |       |                            |
| Overall              | 5.25 (7.44)                         | 0.48 |                            | 7.59 (7.47)                       | 0.31  |                            |
| Not current drinkers | 18.83 (19.59)                       | 0.34 | 0.86                       | 20.43 (20.23)                     | 0.31  | 0.83                       |
| Current drinkers     | 6.22 (7.97)                         | 0.44 |                            | 7.19 (8)                          | 0.37  |                            |
| <b>LDL-C</b>         |                                     |      |                            |                                   |       |                            |
| Overall              | 14.86 (16.06)                       | 0.35 |                            | 13.43 (16.2)                      | 0.41  |                            |
| Not current drinkers | 36.1 (49.22)                        | 0.46 | 0.51                       | 27.18 (50.69)                     | 0.59  | 0.61                       |
| Current drinkers     | 12.19 (17.05)                       | 0.47 |                            | 10.48 (17.11)                     | 0.54  |                            |
| <b>log-TG</b>        |                                     |      |                            |                                   |       |                            |
| Overall              | -0.69 (0.27)                        | 0.01 |                            | -0.72 (0.27)                      | 0.007 |                            |
| Not current drinkers | -1.72 (0.84)                        | 0.04 | 0.20                       | -1.61 (0.86)                      | 0.06  | 0.21                       |
| Current drinkers     | -0.58 (0.28)                        | 0.04 |                            | -0.6 (0.28)                       | 0.03  |                            |

## Total cholesterol

|                      |               |      |      |               |      |      |
|----------------------|---------------|------|------|---------------|------|------|
| Overall              | -0.09 (18.19) | 1.00 |      | -0.67 (18.26) | 0.97 |      |
| Not current drinkers | 3.78 (55.05)  | 0.95 | 0.94 | -2.29 (56.42) | 0.97 | 0.97 |
| Current drinkers     | 0.98 (19.29)  | 0.96 |      | -0.34 (19.32) | 0.99 |      |

---

BMI=body mass index; GRS=Genetic Risk Score; HDL-C=High-density lipoprotein cholesterol; LDL-C=Low-density lipoprotein cholesterol; log-TG=logarithmically transformed triglycerides; SE=standard error

---

<sup>a</sup> Genetic risk scores 1 (GRS1) for leptin was generated by summing leptin increasing alleles of 3 SNPs adjusted for body mass index (BMI), weighted by their corresponding effect sizes reported by Kilpelainen et al;

<sup>b</sup> Assessed by adding an interaction term, drinking×GRS along with the drinking variable to the age, sex, BMI and waist adjusted model among the overall participants;

<sup>c</sup> Adjusted for age, sex, education, smoking, drinking, BMI, waist, and physical activity among the overall sample;

<sup>d</sup> Assessed by adding an interaction term, drinking×GRS to the fully adjusted model among the overall participants.

**Supplemental Table S4. Association of BMI dependent Leptin GRS2<sup>a</sup> with Baseline Lipids among Overall, Drinking, and Non-Drinking Participants without treating for Lipids of the Framingham Heart Study 3<sup>rd</sup> Generation Cohort, Respectively.**

|                          | Age, sex, BMI, waist adjusted model |          |                                             | Fully adjusted model <sup>c</sup> |          |                                             |
|--------------------------|-------------------------------------|----------|---------------------------------------------|-----------------------------------|----------|---------------------------------------------|
|                          | Beta( SE)                           | <i>P</i> | <i>P</i> <sub>interaction<sup>b</sup></sub> | Beta( SE)                         | <i>P</i> | <i>P</i> <sub>interaction<sup>d</sup></sub> |
| <b>HDL-C</b>             |                                     |          |                                             |                                   |          |                                             |
| Overall                  | -9.73 (6.50)                        | 0.13     |                                             | -9.66 (6.53)                      | 0.14     |                                             |
| Not current drinkers     | -2.61 (17.44)                       | 0.88     | 0.72                                        | -1.22 (17.77)                     | 0.95     | 0.68                                        |
| Current drinkers         | -10.52 (6.94)                       | 0.13     |                                             | -10.19 (6.99)                     | 0.15     |                                             |
| <b>LDL-C</b>             |                                     |          |                                             |                                   |          |                                             |
| Overall                  | -0.42 (14.02)                       | 0.98     |                                             | -1.56 (14.17)                     | 0.91     |                                             |
| Not current drinkers     | -83.19 (43.58)                      | 0.06     | 0.07                                        | -94.12 (44.22)                    | 0.03     | 0.05                                        |
| Current drinkers         | 9.71 (14.86)                        | 0.51     |                                             | 7.61 (14.96)                      | 0.61     |                                             |
| <b>log-TG</b>            |                                     |          |                                             |                                   |          |                                             |
| Overall                  | -0.63 (0.23)                        | 0.007    |                                             | -0.63 (0.23)                      | 0.007    |                                             |
| Not current drinkers     | -2.09 (0.74)                        | 0.005    | 0.04                                        | -2.00 (0.75)                      | 0.008    | 0.05                                        |
| Current drinkers         | -0.45 (0.25)                        | 0.07     |                                             | -0.47 (0.25)                      | 0.05     |                                             |
| <b>Total cholesterol</b> |                                     |          |                                             |                                   |          |                                             |

|                      |                 |       |      |                 |       |      |
|----------------------|-----------------|-------|------|-----------------|-------|------|
| Overall              | -25.28 (15.87)  | 0.11  |      | -26.38 (15.97)  | 0.10  |      |
| Not current drinkers | -136.15 (48.44) | 0.005 | 0.03 | -144.29 (48.92) | 0.003 | 0.02 |
| Current drinkers     | -10.96 (16.82)  | 0.51  |      | -13.64 (16.90)  | 0.42  |      |

BMI=body mass index; GRS=Genetic Risk Score; HDL-C=High-density lipoprotein cholesterol; LDL-C=Low-density lipoprotein cholesterol; log-TG=logarithmically transformed triglycerides; SE=standard error

<sup>a</sup> Genetic risk scores 2 (GRS2) for leptin was generated by summing leptin increasing alleles of 3 SNPs unadjusted for body mass index (BMI), weighted by their corresponding effect sizes reported by Kilpelainen et al;

<sup>b</sup> Assessed by adding an interaction term, drinking×GRS along with the drinking variable to the age, sex, BMI and waist adjusted model among the overall participants;

<sup>c</sup> Adjusted for age, sex, education, smoking, drinking, BMI, waist, and physical activity among the overall sample;

<sup>d</sup> Assessed by adding an interaction term, drinking×GRS to the fully adjusted model among the overall participants.

**Supplemental Table S5. Association of BMI independent Leptin GRS1<sup>a</sup> with Baseline Lipids among Overall, Drinking, and Non-Drinking Participants without treating for Lipids and Diabetes of the Framingham Heart Study 3<sup>rd</sup> Generation Cohort, Respectively.**

|                      | Age, sex, BMI, waist adjusted model |          | <i>P</i> <sub>interaction<sup>b</sup></sub> | Fully adjusted model <sup>c</sup> |          | <i>P</i> <sub>interaction<sup>d</sup></sub> |
|----------------------|-------------------------------------|----------|---------------------------------------------|-----------------------------------|----------|---------------------------------------------|
|                      | Beta( SE)                           | <i>P</i> |                                             | Beta( SE)                         | <i>P</i> |                                             |
| <b>HDL-C</b>         |                                     |          |                                             |                                   |          |                                             |
| Overall              | 5.64 (7.47)                         | 0.45     |                                             | 8.00 (7.49)                       | 0.29     |                                             |
| Not current drinkers | 20.89 (19.62)                       | 0.29     | 0.72                                        | 22.51 (20.25)                     | 0.27     | 0.69                                        |
| Current drinkers     | 6.22 (7.98)                         | 0.44     |                                             | 7.17 (8.02)                       | 0.37     |                                             |
| <b>LDL-C</b>         |                                     |          |                                             |                                   |          |                                             |
| Overall              | 15.29 (16.11)                       | 0.34     |                                             | 13.42 (16.27)                     | 0.41     |                                             |
| Not current drinkers | 33.51 (49.77)                       | 0.50     | 0.58                                        | 24.63 (51.26)                     | 0.63     | 0.68                                        |
| Current drinkers     | 12.68 (17.09)                       | 0.46     |                                             | 10.99 (17.16)                     | 0.52     |                                             |
| <b>log-TG</b>        |                                     |          |                                             |                                   |          |                                             |
| Overall              | -0.66 (0.27)                        | 0.01     |                                             | -0.69 (0.27)                      | 0.01     |                                             |
| Not current drinkers | -1.60 (0.85)                        | 0.06     | 0.23                                        | -1.46 (0.86)                      | 0.09     | 0.25                                        |
| Current drinkers     | -0.57 (0.28)                        | 0.04     |                                             | -0.59 (0.28)                      | 0.04     |                                             |

## Total cholesterol

|                      |              |      |      |              |      |      |
|----------------------|--------------|------|------|--------------|------|------|
| Overall              | 1.17 (18.24) | 0.95 |      | 0.14 (18.33) | 0.99 |      |
| Not current drinkers | 6.19 (55.64) | 0.91 | 0.93 | 1.04 (57.03) | 0.99 | 0.99 |
| Current drinkers     | 1.56 (19.35) | 0.94 |      | 0.26 (19.38) | 0.99 |      |

---

BMI=body mass index; GRS=Genetic Risk Score; HDL-C =High-density lipoprotein cholesterol; LDL-C =Low-density lipoprotein cholesterol; log-TG=logarithmically transformed triglycerides; SE=standard error

---

<sup>a</sup> Genetic risk scores 1 (GRS1) for leptin was generated by summing leptin increasing alleles of 3 SNPs adjusted for body mass index (BMI), weighted by their corresponding effect sizes reported by Kilpelainen et al;

<sup>b</sup> Assessed by adding an interaction term, drinking×GRS along with the drinking variable to the age, sex, BMI and waist adjusted model among the overall participants;

<sup>c</sup> Adjusted for age, sex, education, smoking, drinking, BMI, waist, and physical activity among the overall sample;

<sup>d</sup> Assessed by adding an interaction term, drinking×GRS to the fully adjusted model among the overall participants.



**Supplemental Table S6. Association of BMI dependent Leptin GRS2<sup>a</sup> with Baseline Lipids among Overall, Drinking, and Non-Drinking Participants without treating for Lipids and Diabetes of the Framingham Heart Study 3<sup>rd</sup> Generation Cohort, respectively.**

|                      | Age, sex, BMI, waist adjusted model |          |                                             | Fully adjusted model <sup>c</sup> |          |                                             |
|----------------------|-------------------------------------|----------|---------------------------------------------|-----------------------------------|----------|---------------------------------------------|
|                      | Beta( SE)                           | <i>P</i> | <i>P</i> <sub>interaction<sup>b</sup></sub> | Beta( SE)                         | <i>P</i> | <i>P</i> <sub>interaction<sup>d</sup></sub> |
| <b>HDL-C</b>         |                                     |          |                                             |                                   |          |                                             |
| Overall              | -10.39 (6.52)                       | 0.11     |                                             | -10.48 (6.55)                     | 0.11     |                                             |
| Not current drinkers | -8.18 (17.54)                       | 0.64     | 0.95                                        | -7.77 (17.87)                     | 0.66     | 0.92                                        |
| Current drinkers     | -10.58 (6.96)                       | 0.13     |                                             | -10.32 (7.01)                     | 0.14     |                                             |
| <b>LDL-C</b>         |                                     |          |                                             |                                   |          |                                             |
| Overall              | -1.58 (14.07)                       | 0.91     |                                             | -3.3 (14.22)                      | 0.82     |                                             |
| Not current drinkers | -95.04 (44.19)                      | 0.03     | 0.04                                        | -105.66 (44.81)                   | 0.02     | 0.03                                        |
| Current drinkers     | 8.84 (14.90)                        | 0.55     |                                             | 6.84 (15.00)                      | 0.65     |                                             |
| <b>log-TG</b>        |                                     |          |                                             |                                   |          |                                             |
| Overall              | -0.62 (0.23)                        | 0.008    |                                             | -0.62 (0.23)                      | 0.008    |                                             |
| Not current drinkers | -2.00 (0.75)                        | 0.008    | 0.06                                        | -1.87 (0.76)                      | 0.01     | 0.08                                        |

|                      |                 |       |      |                 |       |      |
|----------------------|-----------------|-------|------|-----------------|-------|------|
| Current drinkers     | -0.45 (0.25)    | 0.07  |      | -0.48 (0.25)    | 0.05  |      |
| Total cholesterol    |                 |       |      |                 |       |      |
| Overall              | -26.72 (15.92)  | 0.09  |      | -28.67 (16.03)  | 0.07  |      |
| Not current drinkers | -150.52 (49.04) | 0.002 | 0.01 | -158.43 (49.51) | 0.002 | 0.01 |
| Current drinkers     | -12.06 (16.87)  | 0.47  |      | -14.69 (16.95)  | 0.39  |      |

---

BMI=body mass index; GRS=Genetic Risk Score; HDL-C=High-density lipoprotein cholesterol; LDL-C=Low-density lipoprotein cholesterol; log-TG=logarithmically transformed triglycerides; SE=standard error

---

<sup>a</sup> Genetic risk scores 2 (GRS2) for leptin was generated by summing leptin increasing alleles of 3 SNPs unadjusted for body mass index (BMI), weighted by their corresponding effect sizes reported by Kilpelainen et al;

<sup>b</sup> Assessed by adding an interaction term, drinking×GRS along with the drinking variable to the age, sex, BMI and waist adjusted model among the overall participants;

<sup>c</sup> Adjusted for age, sex, education, smoking, drinking, BMI, waist, and physical activity among the overall sample;

<sup>d</sup> Assessed by adding an interaction term, drinking×GRS to the fully adjusted model among the overall participants.

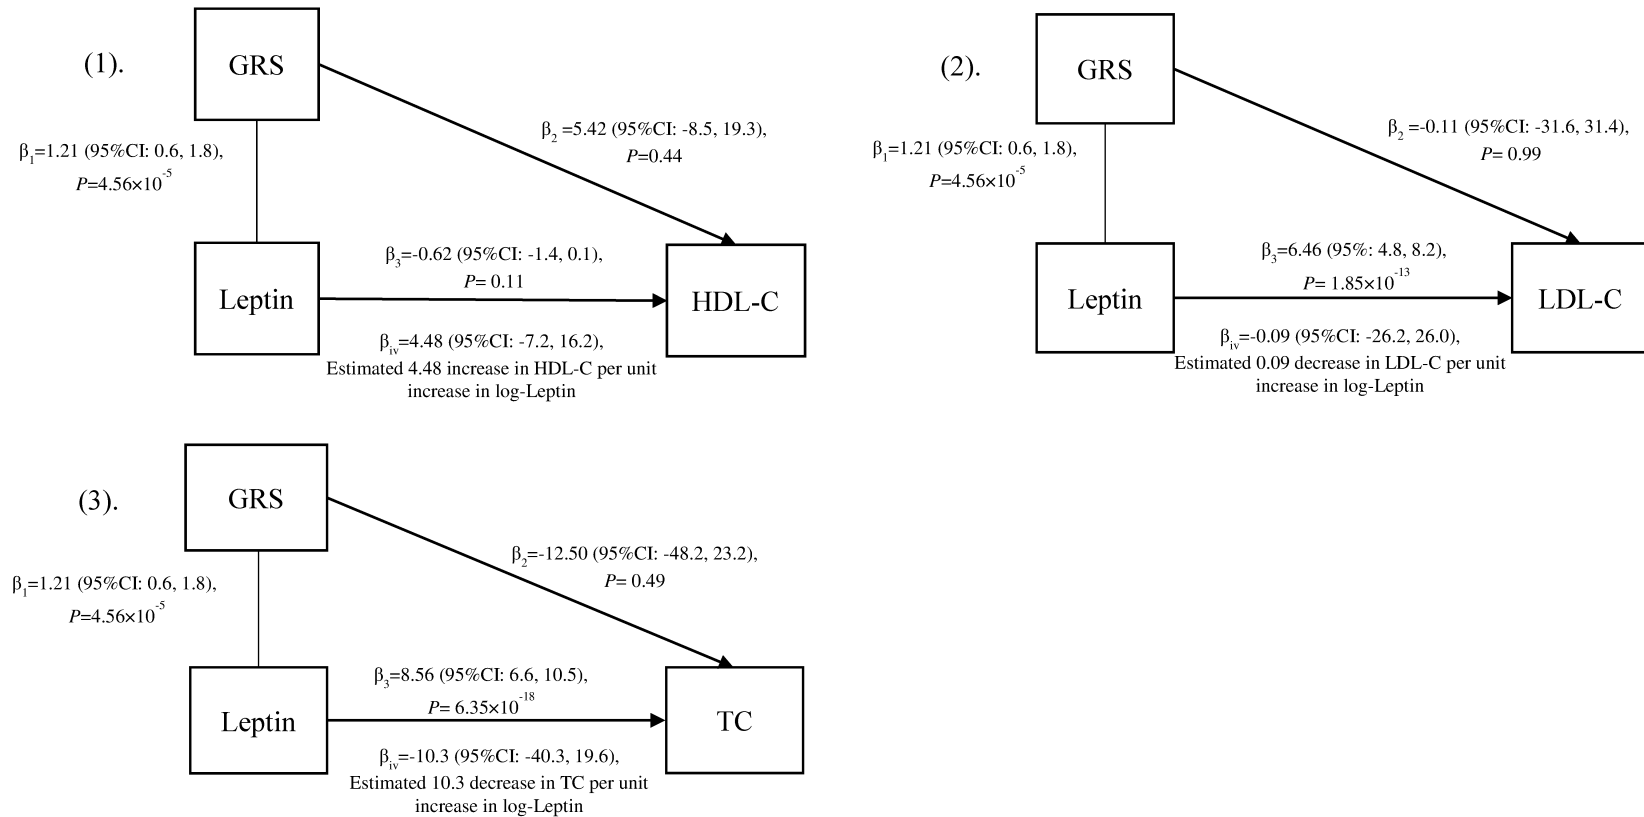

**Supplemental Figure S1. The relationship between Leptin, Genetic Risk Score 1 (GRS1) for Leptin and Lipids in Framingham Heart Study the 3<sup>rd</sup> Generation cohort.**

1. The relationship between leptin, genetic risk score for leptin and high density lipoprotein cholesterol (HDL-C)
2. The relationship between leptin, genetic risk score for leptin and low density lipoprotein cholesterol (LDL-C)
3. The relationship between leptin, genetic risk score for leptin and total cholesterol (TC)

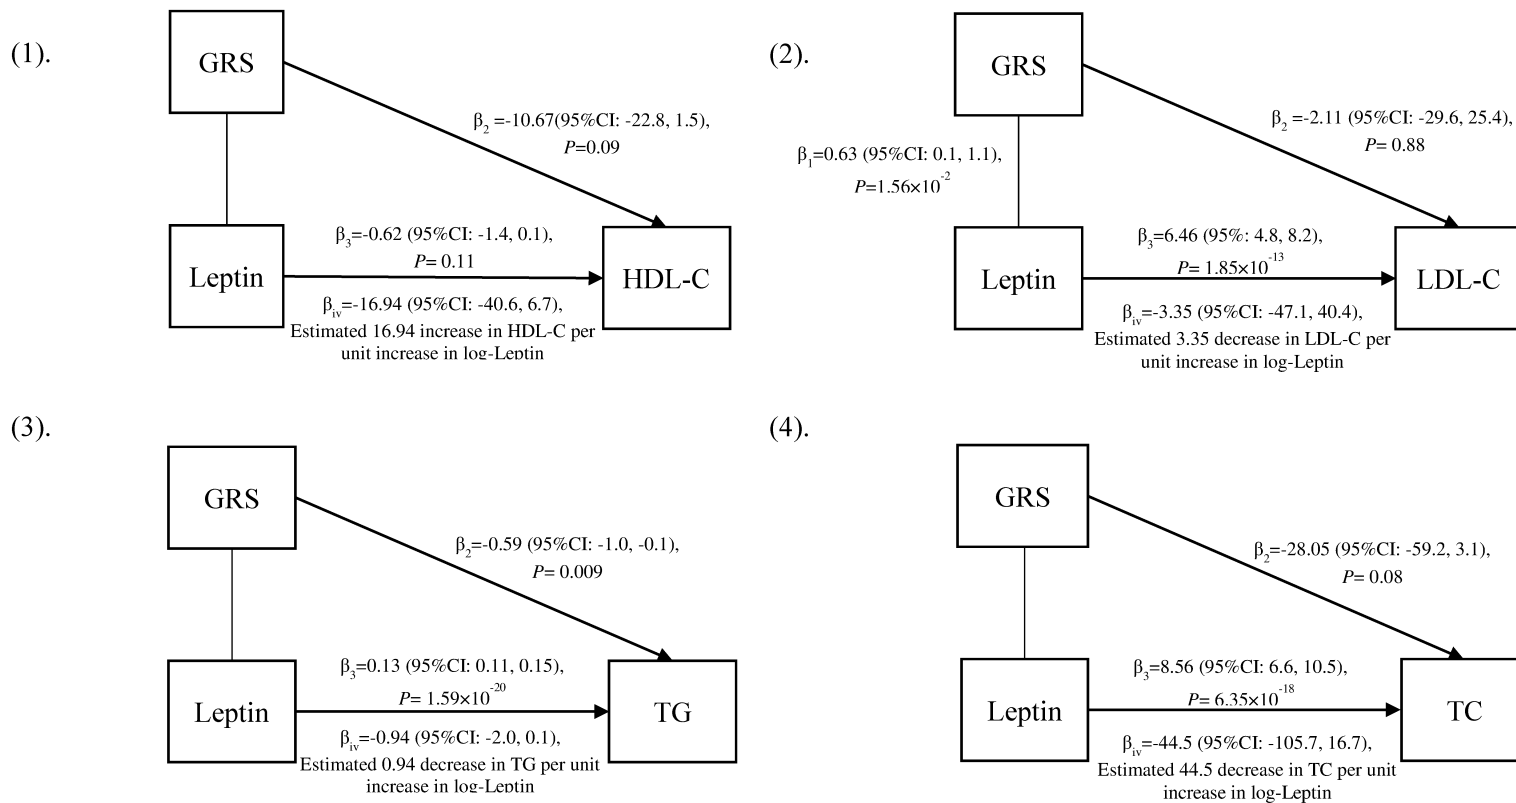

**Supplemental Figure S2. The relationship between Leptin, Genetic Risk Score 2 (GRS2) for Leptin and Lipids in Framingham Heart Study the 3<sup>rd</sup> Generation cohort.**

1. The relationship between leptin, genetic risk score for leptin and high density lipoprotein cholesterol (HDL-C)
2. The relationship between leptin, genetic risk score for leptin and low density lipoprotein cholesterol (LDL-C)
3. The relationship between leptin, genetic risk score for leptin and triglycerides (TG)

4. The relationship between leptin, genetic risk score for leptin and total cholesterol (TC)
